# Supplementary material for: Xylitol for the prevention of acute otitis media episodes in children aged 2–4 years: protocol for a pragmatic randomised controlled trial
Source: PubMed Central journal article supplement — BMJ Open. 2018 Aug 5;8(8):e020941. doi: 10.1136/bmjopen-2017-020941 (PMC6078241; doi:10.1136/bmjopen-2017-020941), 2018-08-05
Supplement: bmjopen-2017-020941.draft_revisions.pdf [file bmjopen-2017-020941.draft_revisions.pdf]

# BMJ Open

BMJ Open is committed to open peer review. As part of this commitment we make the peer review history of every article we publish publicly available.

When an article is published we post the peer reviewers' comments and the authors' responses online. We also post the versions of the paper that were used during peer review. These are the versions that the peer review comments apply to.

The versions of the paper that follow are the versions that were submitted during the peer review process. They are not the versions of record or the final published versions. They should not be cited or distributed as the published version of this manuscript.

BMJ Open is an open access journal and the full, final, typeset and author-corrected version of record of the manuscript is available on our site with no access controls, subscription charges or pay-per-view fees (<http://bmjopen.bmj.com>).

If you have any questions on BMJ Open's open peer review process please email [info.bmjopen@bmj.com](mailto:info.bmjopen@bmj.com)

# BMJ Open

## Xylitol for the prevention of acute otitis media episodes in children aged 2-4 years: Protocol for a pragmatic randomized controlled trial

|                                 |                                                                                                                                                                                                                                                                                                                                                                                                                                                                                                                                                                                                                                                                                                                                                                                                                                                                                                                                                                                                                                                                                                                                                                                                                                                                                                                                                             |
|---------------------------------|-------------------------------------------------------------------------------------------------------------------------------------------------------------------------------------------------------------------------------------------------------------------------------------------------------------------------------------------------------------------------------------------------------------------------------------------------------------------------------------------------------------------------------------------------------------------------------------------------------------------------------------------------------------------------------------------------------------------------------------------------------------------------------------------------------------------------------------------------------------------------------------------------------------------------------------------------------------------------------------------------------------------------------------------------------------------------------------------------------------------------------------------------------------------------------------------------------------------------------------------------------------------------------------------------------------------------------------------------------------|
| Journal:                        | <i>BMJ Open</i>                                                                                                                                                                                                                                                                                                                                                                                                                                                                                                                                                                                                                                                                                                                                                                                                                                                                                                                                                                                                                                                                                                                                                                                                                                                                                                                                             |
| Manuscript ID                   | bmjopen-2017-020941                                                                                                                                                                                                                                                                                                                                                                                                                                                                                                                                                                                                                                                                                                                                                                                                                                                                                                                                                                                                                                                                                                                                                                                                                                                                                                                                         |
| Article Type:                   | Protocol                                                                                                                                                                                                                                                                                                                                                                                                                                                                                                                                                                                                                                                                                                                                                                                                                                                                                                                                                                                                                                                                                                                                                                                                                                                                                                                                                    |
| Date Submitted by the Author:   | 04-Dec-2017                                                                                                                                                                                                                                                                                                                                                                                                                                                                                                                                                                                                                                                                                                                                                                                                                                                                                                                                                                                                                                                                                                                                                                                                                                                                                                                                                 |
| Complete List of Authors:       | <p>Persaud, Nav; St. Michael's Hospital, Li Ka Shing Knowledge Institute<br/>         Laupacis, Andreas; St. Michael's Hospital, Li Ka Shing Knowledge Institute; University of Toronto, Department of Family and Community Medicine<br/>         Azarpazhooh, Amir; Faculty of Dentistry, University of Toronto<br/>         Birken, Catherine; University of Toronto<br/>         Hoch, Jeffrey; University of Davis, Center for Health Policy and Research<br/>         Isaranuwatthai, Wanrudee; St. Michael's Hospital, Li Ka Shing Knowledge Institute, Knowledge Translation<br/>         Maguire, Jonathan; Hospital for Sick Children, Department of Paediatrics<br/>         Mamdani, Muhammad; St. Michael's Hospital, Applied Health Research Centre, Li Ka Shing Knowledge Institute<br/>         Thorpe, Kevin; University of Toronto Dalla Lana School of Public Health<br/>         Allen, Christopher; Li Ka Shing Knowledge Institute, The Applied Health Research Centre<br/>         Mason, Dalah; Hospital for Sick Children, Child Health Evaluative Sciences<br/>         Kowal, Christine; Hospital for Sick Children, Child Health Evaluative Sciences<br/>         Bazeghi, Farnaz; St. Michael's Hospital, Li Ka Shing Knowledge Institute<br/>         Parkin, Patricia; The Hospital for Sick Children, Pediatric Medicine</p> |
| <b>Primary Subject Heading</b>: | General practice / Family practice                                                                                                                                                                                                                                                                                                                                                                                                                                                                                                                                                                                                                                                                                                                                                                                                                                                                                                                                                                                                                                                                                                                                                                                                                                                                                                                          |
| Secondary Subject Heading:      | Paediatrics                                                                                                                                                                                                                                                                                                                                                                                                                                                                                                                                                                                                                                                                                                                                                                                                                                                                                                                                                                                                                                                                                                                                                                                                                                                                                                                                                 |
| Keywords:                       | otitis media, upper respiratory tract infection, dental caries, xylitol, sorbitol                                                                                                                                                                                                                                                                                                                                                                                                                                                                                                                                                                                                                                                                                                                                                                                                                                                                                                                                                                                                                                                                                                                                                                                                                                                                           |
|                                 |                                                                                                                                                                                                                                                                                                                                                                                                                                                                                                                                                                                                                                                                                                                                                                                                                                                                                                                                                                                                                                                                                                                                                                                                                                                                                                                                                             |

SCHOLARONE™  
Manuscripts

Xylitol for the prevention of acute otitis media episodes in children aged 2-4 years: Protocol for a pragmatic randomized controlled trial

Nav Persaud,<sup>1, 2,3</sup> Andreas Laupacis,<sup>1, 2, 4</sup> Amir Azarpazhooh,<sup>5, 6,7, 8</sup> Catherine Birken,<sup>7,9,10,11,12,13</sup> Jeffrey S Hoch,<sup>2,4,7,14,15,16,17</sup> Wanrudee Isaranuwachai,<sup>7,18</sup> Jonathon L Maguire,<sup>9,10,19,20</sup> Muhammad Mamdani,<sup>2,4,7,16, 21,22</sup> Kevin Thorpe,<sup>2,23</sup> Christopher Allen,<sup>10</sup> Dalah Mason,<sup>13</sup> Christine Kowal,<sup>13</sup> Farnaz Bazeghi,<sup>2,13</sup> Patricia Parkin,<sup>7, 9,11,12,13</sup> and The TARGet Kids! Collaboration

### Author affiliations

1. Department of Family and Community Medicine, St Michael's Hospital, Toronto, Canada
2. Li Ka Shing Knowledge Institute, St Michael's Hospital, Toronto, Ontario, Canada
3. Department of Family and Community Medicine, University of Toronto, Toronto, Ontario, Canada
4. Institute for Clinical Evaluative Sciences (ICES), Toronto, Canada
5. Faculty of Dentistry, University of Toronto, Toronto, Canada.
6. Department of Dentistry, Mount Sinai Hospital, Toronto, Canada.
7. Institute of Health Policy, Management and Evaluation, University of Toronto, Toronto, Ontario Canada.
8. Toronto Health Economics and Technology Assessment Collaborative, University of Toronto, Toronto, Canada.
9. Department of Paediatrics, The Hospital for Sick Children (SickKids), University of Toronto, Canada
10. The Applied Health Research Centre of the Li Ka Shing Knowledge Institute, St Michael's Hospital, Toronto, Canada.
11. Pediatric Outcomes Research Team, Division of Pediatric Medicine, Department of Pediatrics, the Hospital for Sick Children, Toronto, Ontario, Canada
12. Department of Pediatrics, Faculty of Medicine, University of Toronto, Toronto, Ontario, Canada
13. Child Health Evaluative Sciences, SickKids Research Institute, Toronto, Ontario, Canada
14. Department of Public Health Sciences, School of Medicine, University of California, Davis, CA, United States
15. Center for Health Policy and Research, University of California, Davis, CA, United States.
16. Leslie Dan Faculty of Pharmacy, University of Toronto, Toronto, Canada
17. Department of Public Health Sciences, University of California, Davis, CA, United States
18. Centre for Excellence in Economic Analysis Research (CLEAR), St. Michael's Hospital, Toronto, ON, Canada.
19. Paediatric Outcomes Research Team, The Hospital for Sick Children (SickKids), University of Toronto, Canada
20. Department of Paediatrics, St Michael's Hospital, Toronto, Canada.
21. Department of Medicine, University of Toronto Faculty of Medicine, Toronto, Ontario, Canada
22. Centre for Healthcare Analytics Research and Training, St Michael's Hospital, Toronto, Canada
23. Dalla Lana School of Public Health, University of Toronto, Toronto, Ontario, Canada

Key words: otitis media, upper respiratory tract infection, dental caries, xylitol, sorbitol

Correspondence to Dr. Nav Persaud; [nav.persaud@utoronto.ca](mailto:nav.persaud@utoronto.ca).

Word count: 4596

## ABSTRACT

### Introduction

Xylitol (or “birch sugar”) is a naturally occurring sugar with antibacterial properties that has been used as a natural non-sugar sweetener in chewing gums, confectionery, toothpaste and medicines. In this preventative randomized trial, Xylitol will be tested for the prevention of acute otitis media (AOM), a common and costly condition in young children. The primary outcome will be the incidence of AOM. Secondary outcomes will include upper respiratory tract infections (URTIs) and dental caries.

### Methods and analysis

This study will be a pragmatic, blinded (participant and parents, practitioners and analyst), two-armed superiority; placebo randomized controlled trial (RCT) with 1:1 allocation, stratified by clinical site. The trial will be conducted in the eleven primary care group practices participating in the TARGet Kids! research network in Canada. Eligible participants between the ages of 2-4 years will be randomly assigned to the intervention arm of regular xylitol syrup use or the control arm of regular sorbitol use for 6 months. We expect to recruit 236 participants, per treatment arm, to detect a 20% relative risk reduction in AOM episodes. AOM will be identified through chart review. The secondary outcomes of URTIs and dental caries will be identified through monthly phone calls with specified questions.

### Ethics and dissemination

Ethics approval has been obtained from St. Michael's Hospital, and The Hospital for Sick Children for the sites participating in the TARGet Kids! research network. Results will be submitted for publication to a peer-reviewed journal and will be discussed with decision makers.

**Trial registration number:** NCT03055091 (clinicaltrials.gov)

### Strengths and limitations of this study

- This trial has the potential to determine whether a natural sweetener with antimicrobial properties prevents three common conditions during early childhood: otitis media, dental caries and upper respiratory tract infections
- The trial will be conducted through the TARGet Kids! primary care research network
- The six months of treatment and outcome assessment will allow the evaluation of the longer term effects of xylitol
- A challenge for trials with acute otitis media as an outcome is that parents may not distinguish AOM from other URTIs with similar symptoms and may not seek care; we will include both clinician-diagnosed AOM and parent-reported URTIs as separate outcomes.

## INTRODUCTION

Acute otitis media (AOM) is a common and costly condition in young children.<sup>1</sup> The annual global incidence of AOM is 700 million per year and 50% of those affected are children under the age of 5 years.<sup>2</sup> By age 3 years, 84% of children have had at least one episode of AOM and

1  
2  
3 46% have had 3 or more episodes.<sup>3</sup> Antibiotic treatment has only a modest effect on AOM  
4 duration<sup>4</sup> and does not prevent serious complications such as mastoiditis or meningitis which can  
5 rarely be fatal.<sup>5 6</sup> Most (>80%) children with AOM presenting for care have spontaneous  
6 symptom resolution within 3 days and the number needed to treat for antibiotic treatment to  
7 reduce symptom duration is 20 days, which must be balanced by a number needed to harm (with  
8 adverse effects of antibiotics such as diarrhea) of 14 days.<sup>4</sup> The incidence of mastoiditis has not  
9 changed over time despite changes in antibiotic prescribing.<sup>5 6 7</sup> Rare sequelae of AOM include  
10 delayed cognitive development, impaired communication skills and permanent hearing loss.<sup>3</sup>  
11 Parents of children with otitis media report missing 2-3 days of work per episode.<sup>1</sup>

12  
13  
14 Another common and costly infectious disease amongst North American pre-school aged  
15 children is upper respiratory tract infections (URTIs).<sup>8 9 10-12</sup> URTIs are the most common reason  
16 for emergency department visits and unscheduled outpatient visits in Canada, accounting for  
17 10% of emergency department visits for children under 10 years of age.<sup>13 14 15</sup> URTIs are also the  
18 most common reason for unscheduled visits to a care provider and Canadian children experience  
19 3-8 URTIs per year at a cost to the healthcare system of several hundred million dollars per  
20 year.<sup>16 17</sup>

21  
22 Nearly 30% of 2-5 year old children have dental caries.<sup>18</sup> Dental caries may lead to pain,  
23 difficulty eating and speaking, and can harm a child's self-esteem.<sup>19</sup> Treating dental caries in  
24 young children is challenging for practitioners, painful for the children and caries cost thousands  
25 of dollars to treat, with complicated caries requiring hospitalization costing several times more  
26 (and rarely resulting in death).<sup>20 21 22 23 24 25</sup>

27  
28 *In vitro* studies have shown that xylitol can reduce the attachment of bacteria that cause  
29 AOM, URTIs, and dental caries such as *Streptococcus Pneumoniae* and *Haemophilus Influenzae*  
30 to nasopharyngeal cells. AOM occurs when the upper airway is colonized with bacteria, viruses  
31 or a combination of both that travel from the nasopharynx to the middle ear by way of the  
32 Eustachian tube.<sup>26</sup> A Cochrane systematic review of the safety and efficacy of xylitol in  
33 preventing AOM in children up to 12 years of age found that there is fair evidence supporting the  
34 use of xylitol for the prevention of AOM (risk ratio, 0.75; 95% CI, 0.65 to 0.88 based on 3 RCTs  
35 from the same research group, studying 1826 children in total), but concluded that an adequately-  
36 powered, well designed trial is necessary.<sup>27</sup> Previous trials have not established whether regular  
37 xylitol syrup use is effective at preventing AOM in young children (<4 years) who are most  
38 likely to have AOM. Several RCTs of xylitol for the prevention of dental caries indicate that the  
39 antimicrobial effect of xylitol (which is posited to account for its efficacy in preventing AOM)  
40 increases with duration of use.<sup>28 29 30</sup> Therefore, the effect of the same dose of xylitol may be  
41 more effective at preventing AOM over the 6 month study period in the proposed study than it  
42 was in the previous trials that lasted 2 or 3 months.<sup>31</sup> The longer trials of xylitol for the  
43 prevention of dental caries also demonstrate that daily xylitol administration is safe, feasible and  
44 well tolerated for the 6 month study period in the proposed trial.<sup>28 29 30</sup> A pilot study of higher  
45 concentrations of xylitol syrup in young children found good compliance and tolerability.<sup>32</sup> In  
46 summary, regular xylitol syrup used for the 6 month study period is safe and feasible, and there  
47 is clinical equipoise over its effectiveness at preventing AOM in young children. There is no  
48 recommendation for or against the use of xylitol in the United States or in Canada. The paucity  
49 of high quality randomized controlled trials has been cited as a reason for the lack of consistent  
50 recommendations regarding the use of xylitol in young children.<sup>33</sup>

51  
52  
53  
54 The primary purpose of this study is to determine if regular use of xylitol syrup  
55 effectively prevents AOM in unselected 2-4 year old children. Such an intervention could  
56  
57  
58  
59  
60

1  
2  
3 increase the productivity of parents and caregivers, reduce serious complications and reduce the  
4 suffering of young children - each episode of AOM involves several excess hours of crying for  
5 two to seven days.<sup>34</sup> This trial could change clinical practice if the results are positive. In several  
6 other countries xylitol is recommended for the prevention of dental caries. For example, the  
7 *American Academy of Pediatric Dentists* recommends regular xylitol use for the prevention of  
8 dental caries based on the results of eight clinical trials.<sup>35</sup> However, a survey of American  
9 pediatricians found that few physicians (12%) recommend xylitol to patients and that most  
10 would either definitely (68%) or possibly (29%) recommend xylitol if there was additional  
11 evidence that it prevented AOM.<sup>36</sup>  
12  
13

## 14 AIMS AND OBJECTIVES

### 17 Primary Question

18 Does regular xylitol syrup use for 6 months reduce the number of physician-diagnosed AOM  
19 episodes in children aged 2-4 years?  
20  
21

### 22 Secondary Questions

- 23 (1) Does regular xylitol syrup use reduce the number of parent-reported upper respiratory tract  
24 infection (URTI) episodes in children aged 2-4 years?  
25 (2) Does regular xylitol syrup use reduce parent-reported dental caries in children aged 2-4  
26 years?  
27  
28  
29

## 30 METHODS AND ANALYSIS

### 32 Study Design

33 This will be a pragmatic, blinded (participant and parents, practitioners and analyst), two-armed  
34 superiority; placebo controlled randomized trial with 1:1 allocation, stratified by clinical site.  
35  
36

### 37 Setting

38 The trial will be conducted in the eleven primary care group practices currently participating in  
39 the TARGet Kids! research network ([www.targetkids.ca](http://www.targetkids.ca)) in Canada. There are no sites outside of  
40 Canada.  
41  
42

### 43 Eligibility Criteria

44 The patients in this study are healthy children aged 2-4 years who are participants of The  
45 Applied Research Group for Kids (TARGet Kids!), the largest pediatric primary care practice-  
46 based research network in Canada focused on child health ([www.targetkids.ca](http://www.targetkids.ca)).  
47  
48

49 **Inclusion criteria:** age 24-48 months at start of intervention, and parent or care provider able to  
50 give consent for participation including being able to understand the information provided in  
51 English. All children recruited to this study will also be participants in the TARGet Kids!  
52 research network.  
53

54 **Exclusion criteria:** craniofacial malformations, structural middle ear abnormalities, sibling or  
55 any other child living at the same address already enrolled in the trial (in order to prevent  
56  
57  
58  
59  
60

1  
2  
3 contamination), insertion of ventilation tubes prior to study period, current use of a xylitol  
4 product or reported xylitol sensitivity.  
5

### 6 **Intervention arm**

7 Xylitol (or “birch sugar”) is a naturally occurring sugar with antibacterial properties that has  
8 been used as a natural non-sugar sweetener in chewing gums, confectionery, toothpaste and  
9 medicines.<sup>26 37 38</sup>  
10

11 The investigational agents will be provided by XLEAR, a producer of commercial xylitol  
12 products that are sold in Canada. The product specifications used for this agent is that of their  
13 syrup or “tooth gel” products sold in 60 mL tubes. The product is approved by Health Canada as  
14 a food additive. The product has a shelf life of 2 years based on stability studies. Each tube is  
15 labeled with a best before date and a lot number on the tube crimp.  
16

17 The experimental intervention is the provision of xylitol syrup (35% Xylitol concentration per  
18 weight) and instructions to ingest is 3-5 times per day. Each dose will be 5 mL of 350 g/L,  
19 therefore the maximum possible daily dose will be 9 g of xylitol per day. This is the daily dose  
20 that may be effective from previous trials.<sup>31</sup>  
21  
22

### 23 **Control Arm**

24 The control intervention is the provision of sorbitol syrup (looks, smells and tastes like the  
25 xylitol syrup but is not an antimicrobial). Sorbitol is unlikely to have an effect on our primary  
26 outcome of AOM or the secondary outcomes of URTIs and dental caries; therefore it can be used  
27 as a placebo. The sorbitol syrup formulation is the same as the xylitol syrup except the  
28 concentration of sorbitol will be 30% by weight. The instructions for use are 3-5 times per day.  
29 Each dose will be 5 mL of 300 g/L of sorbitol; therefore the maximum daily dose will be 7.5 g of  
30 sorbitol.  
31

32 XLEAR will produce the investigational agents through a dedicated production run and  
33 ship the products to the research pharmacy in a timely manner. This will allow preparation and  
34 shipment of the kits for each participant prior to the intervention period.  
35

36 The data coordinating center will create master randomization tables and send these to  
37 the research pharmacy for dispensing. The study statistician will create the master randomization  
38 table using a computer-generated, site-stratified, block randomization design. The research  
39 pharmacy will use the randomization table for the dispensation of the investigational agents to  
40 each participant.  
41  
42

### 43 **Intervention period**

44 The treatment period will be 6 months for all participants. The intervention will be given during  
45 the winter season.

46 The follow-up period is identical to the treatment period, and so will also be 6 months for all  
47 participants.

48 Conducting the trial during winter months will maximize the efficiency of the trial because  
49 AOM and URTI incidences are highest during that time.<sup>39</sup> Since xylitol is not a treatment for  
50 infections, care will be provided as normal for any suspected infections.  
51  
52  
53  
54  
55  
56  
57  
58  
59  
60

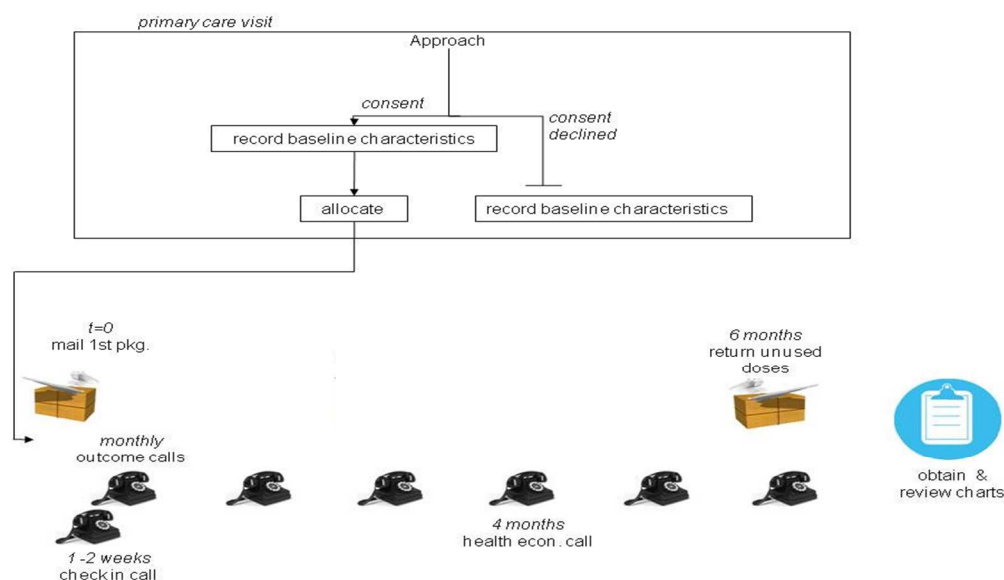

Figure 1. *Timeline for intervention and follow-up.*

### Premature Withdrawal/Discontinuation Criteria

Xylitol is sweet and children generally enjoy consuming it.<sup>32</sup> The number of missed doses in previous trials with frequent daily dosing was around 10%.

Parents will be called two weeks after they have been given the package to discuss any challenges with compliance, as well as during monthly follow-up calls.

Based on data from previous trials conducted in the TARGet Kids! research network and the fact that the primary outcome will be determined using a chart review, we anticipate a low (< 5%) rate of being lost to follow-up in this trial where follow-up does not require any special visits for research purposes only. If a participant leaves the primary care practice, we will attempt to obtain the name of the current care provider and obtain the chart for review. If a participant has left the primary care practice and we are unable to contact the parents or caregivers, we will treat the data as censored. Despite this, the sample size calculation assumes 10% of participants will not complete follow-up.

### Outcome Measures

#### Primary outcome

The primary outcome of the total number of physician-diagnosed AOM episodes will be assessed by reviewing charts of the primary care provider and any other care providers reported by parents or caregiver at monthly phone calls.

Three methods for determining the diagnosis of AOM have been used in trials: clinical signs (bulging and red tympanic membrane), clinical signs with tympanometry, and clinical signs with tympanocentesis.<sup>40</sup> In this trial, the number of AOM episodes will be assessed using both objective clinical signs of AOM recorded in the chart and a physician's diagnosis of AOM. In order to make a diagnosis of AOM for this trial, the chart must contain *both* the documentation of signs of AOM (e.g. erythematous tympanic membrane) plus the practitioners' diagnosis that the patient had AOM. The addition of tympanometry to clinical signs does not improve the accuracy of AOM diagnosis.<sup>41</sup>



1  
2  
3 Further, tympanometry is not employed in routine clinical practice at any of the TARGet  
4 Kids! sites. Tympanocentesis is therapeutic and can prevent subsequent AOM episodes<sup>40</sup> so it  
5 cannot be used in this trial of AOM prevention (and it requires instruments not present in  
6 primary care sites). Four of the five previous trials of xylitol for the prevention of AOM  
7 employed clinical signs with tympanometry, and one used clinical signs to determine the number  
8 of AOM episodes.<sup>31</sup>

9  
10 Previous RCTs of AOM *management* in young children have relied on the diagnoses  
11 made by primary care providers (who are generally the clinicians who diagnose AOM for  
12 clinical purposes).<sup>42 43</sup> The studies, involving longer study periods, used chart reviews to  
13 determine the number of AOM episodes just as we will in this trial (*Appendix 1*).<sup>43</sup>  
14 We have conducted a chart review of 1,637 patients in the TARGet Kids! research network using  
15 a method similar to those in completed RCTs of AOM that involves reviewing charts for  
16 physical examination findings consistent with AOM and a diagnosis or assessment of AOM.<sup>44 42</sup>  
17<sup>43</sup> In all of the episodes, the physical examination findings and the diagnosis were clearly  
18 documented in the chart (the term “AOM” was usually recorded in the assessment portion of the  
19 note), and there was perfect agreement between independent reviewers.

20  
21 In addition to reviews of the patient’s primary care provider medical record, the primary  
22 outcome will also include AOM episodes diagnosed by other care providers (e.g., at walk-in  
23 clinics or emergency rooms). Parental consent for release of this information will be obtained,  
24 and charts will be reviewed upon the end of follow-up period.  
25 The primary analysis will be the total number of AOM episodes during the study period. We will  
26 also summarize the time to first AOM using survival curves.

27  
28 A limitation of employing physician-diagnosed episodes of AOM is that parents may not  
29 seek care when their child has AOM symptoms. This limitation is addressed with the secondary  
30 outcome of parent reported URTIs (*see secondary outcomes below*). Another limitation of  
31 physician-diagnosed AOM is that there is variability in the diagnosis of AOM by clinicians, with  
32 one study of administrative data indicating that some clinicians diagnose AOM twice as often as  
33 others.<sup>40 45</sup> Since the clinicians will be blinded to the allocated group, differences in clinical  
34 assessment will not bias the results.

35  
36 Note that our sample size calculation incorporates the incidence of AOM in the TARGet  
37 Kids! study population and so it takes into consideration the rate of AOM diagnosis by the same  
38 clinicians who will diagnose AOM in these study participants.

### 40 41 Secondary outcomes

42 The secondary outcome parent-reported URTI episodes will be assessed during monthly phone  
43 calls. A challenge in all trials that employ AOM as an outcome is the combined effect of two  
44 factors: (1) parents often decide not to seek care when a child has symptoms that may indicate  
45 AOM and (2) parents cannot distinguish between AOM and other URTIs because the symptoms  
46 are similar. We will address this challenge with our secondary outcome: parent-reported URTIs,  
47 a very common and costly (in aggregate) condition in early childhood.<sup>17 46</sup> The previous shorter  
48 (2 to 3 month) trials of xylitol found a non-significant trend towards fewer URTI episodes in  
49 children receiving xylitol.<sup>31</sup>

50  
51 A cohort study of children aged 2 months to 12 years receiving care at Toronto primary  
52 care sites found that medical consultation was sought in only 56% of episodes of URTI  
53 symptoms.<sup>47</sup> This is not surprising given that guidelines recommend against antibiotics for AOM  
54 and other URTIs in many cases. As many parents are aware of this recommendation from  
55  
56  
57  
58  
59

1  
2  
3 previous clinic visits, they may decide to treat children with analgesics and antipyretics without  
4 seeking care even if they believe the child has an AOM.<sup>48</sup> Thus, information about the total  
5 number of URTI episodes must be obtained directly from parents and caregivers as it will not be  
6 found in a patient's medical record even if it includes records from all institutions and clinics.  
7 Parents may not diagnose AOM accurately based on symptoms because they overlap  
8 substantially with symptoms of URTIs.<sup>49</sup> Irritability and crying are the most common symptoms  
9 in AOM and URTI episodes.<sup>50</sup> Forty percent of children *with* AOM do *not* have an earache and  
10 31% do *not* have a fever,<sup>49</sup> while 72% of children *without* AOM exhibit symptoms of AOM  
11 (crying, fever or ear ache).<sup>50</sup>

12  
13 Like previous studies, we will employ structured telephone interviews to assess the  
14 number of URTI episodes.<sup>51 52 53</sup> Parents or caregivers will be contacted every month and asked  
15 to report the number of URTIs the child has experienced since the last call (or since the  
16 beginning of the trial for the first call) using validated questions (*Appendix 1*).<sup>53</sup> We will employ  
17 the symptoms in the Canadian Acute Respiratory Illness and Flu (CARIF) scale that has been  
18 validated in this population.<sup>54</sup>

19  
20 The secondary outcome, parent-reported dental caries, will also be assessed during the  
21 monthly phone calls. Parents or caregivers will be asked if they have been informed by a dentist  
22 or a physician that their child has or has had at least one or more dental caries (*Appendix 1*). This  
23 question has been used and validated in several epidemiological studies.<sup>55 56 57 58</sup> The dental  
24 caries secondary outcome will be binary (at least one versus none). Those with caries at baseline  
25 will be excluded from this analysis but included in all other analyses.

## 26 27 28 Other measures

29 Health economics measures will be collected for an economic evaluation. We will compare the  
30 cost and effect of the xylitol syrup against the control group using the net benefit regression  
31 framework from the perspective of the parents (who will be the payer for the syrup).<sup>59</sup> Costs will  
32 include costs incurred to the parents or caregivers such as their usual mode of transportation for  
33 attending medical appointments (collected during an extended phone call at the four month call).  
34  
35  
36  
37  
38  
39  
40  
41  
42  
43  
44  
45  
46  
47  
48  
49  
50  
51  
52  
53  
54  
55  
56  
57  
58  
59  
60  
The parent or caregiver hours of productivity (including employment) lost due to the child's  
AOM episodes (including, for example, the days the child could not attend daycare) will also be  
assessed during the monthly calls. The use of net benefit regression allows the economic  
evaluation to be conducted using regression methods (adjusting for potential confounders). The  
main outcome of the economic evaluation will be an incremental net benefit of xylitol syrup (in  
term of cost and number of physician-diagnosed AOM episodes) compared to control. In  
addition, we will estimate incremental cost-effectiveness ratios (e.g., an incremental cost per one  
physician-diagnosed AOM episode avoided and an incremental cost per one URTI episode  
avoided). Statistical uncertainty will be characterized using a 95% confidence interval and cost-  
effectiveness acceptability curves.<sup>60</sup>

Compliance (reported number of doses given per week) will be assessed during the  
monthly calls and by tallying the number of returned doses at the end of the study.

## Sample size rationale

We used the results of three previous RCTs of xylitol for the prevention of AOM and data from  
participants in the TARGet Kids! research network to estimate the sample size.

1  
2  
3 In a chart review of TARGet Kids! research network participants, we found a comparable  
4 event rate as the control groups in the trials above: 670 episodes of AOM in 1637 patients (41%)  
5 over a three month period (0.14 AOM episodes per patient-month).  
6

7 Since the data currently available suggest that the AOM rate is about 1.6 episodes per  
8 patient-year, we will somewhat conservatively assume a control event rate of 1.5. We will aim to  
9 detect a relative risk of 0.8 (i.e. relative risk reduction of 20%) with 80% power and  $\alpha = 0.05$   
10 (two-sided). A 20% RRR was chosen based on previous surveys of reasons physicians do not  
11 currently recommend xylitol and the RRR used in previous trials.<sup>31 36</sup> The sample size  
12 calculations assumed a Poisson distribution for the number of AOM episodes and were based on  
13 the asymptotic distribution of the likelihood ratio test statistic. Calculations were performed in R  
14 (2.15.3) using the *asypow* package and power was confirmed via 10,000 simulations. The  
15 required sample size is 236 per group. (Note that while the number of participants is less than  
16 one of the previous trials<sup>61</sup>, the mean treatment and follow-up period in our study will be  
17 longer.) The above calculations take into consideration non-compliance and a loss to follow-up of  
18 10% of participants only completing 50% of the follow-up period. These calculations assume  
19 there will be no substantial contamination. While xylitol preparations are commercially  
20 available, the dose of xylitol is less than one-tenth the dose found in trials to be effective at  
21 preventing AOM. A survey of TARGet Kids! participants showed that xylitol use is rare (< 5%).  
22 Siblings of those already enrolled in the trial will be excluded since contamination would be  
23 likely if two members of the family are enrolled and allocated to different arms.  
24

25 We expect to recruit 40 participants per month. Thus sufficient patients will be recruited  
26 during two calendar years for the intervention to take place over two winter seasons. A previous  
27 RCT in the TARGet Kids! research network with similar inclusion criteria, exclusion criteria and  
28 recruitment strategy successfully recruited more than 66 children each month for two years when  
29 the network was smaller.<sup>62</sup> Parents of children who are participating in the TARGet Kids!  
30 research network's longitudinal study will be approached by research assistants regarding this  
31 RCT during routine primary care visits throughout the year. Randomization will take place just  
32 before the intervention begins so the small number of patients who are recruited but leave the  
33 practice before the intervention period will not be randomized.  
34

35 We will determine if xylitol is more effective in younger children (24-36 months old  
36 versus >36 months old at time of recruitment).  
37  
38  
39

## 40 **Statistical Analysis**

41 The primary analysis will be performed based on the intention to treat population. The primary  
42 outcome will be analyzed with a Poisson regression model. To account for participants who do  
43 not complete the entire planned follow-up and slight variations in the observation time for  
44 completers, the logarithm of follow-up time will be added as an offset term to the model. The  
45 treatment effect, expressed as a rate ratio (relative risk), and 95% confidence interval will be  
46 obtained from the model. A secondary analysis will adjust for characteristics with an imbalance  
47 between groups at baseline. Patient demographics will be summarized descriptively (e.g., means  
48 and SD or median and IQR for continuous variables and frequency and percentages for  
49 categorical). Although randomization guarantees balance in the long-run, there is a chance of  
50 imbalances in any sample. The demographics will be reviewed for clinically important  
51 imbalances that may be adjusted for in a secondary analysis. The secondary outcomes, number of  
52 URTI episodes and dental caries, will be analyzed similarly to the primary outcome.  
53  
54  
55  
56  
57  
58  
59  
60

## Safety Analysis

A data safety monitoring board is not necessary because xylitol has been demonstrated to be safe in previous trials for the prevention of AOM and dental caries, and the maximum possible efficacy can be estimated from previous trials. We therefore do not anticipate any reason to stop the trial early.

Xylitol can rarely cause osmotic diarrhea and abdominal discomfort. In previous trials, approximately 1% of children exposed to xylitol experienced diarrhea and slightly less than 1% of children exposed to control substances (e.g., sorbitol) experienced diarrhea (difference not statistically significant).<sup>44</sup> The vast majority of children, including 2-4 year olds, are able to tolerate total daily doses of 45g of xylitol without significant gastrointestinal side effects.<sup>63</sup> The maximum total daily dose of xylitol in this trial will be 10g per day.

In previous trials, a total of more than 1000 children were exposed to various formulations of xylitol or control substances and there were no reported episodes of choking or aspiration. The control intervention is the provision of sorbitol syrup which can cause diarrhea but at similar rates as xylitol.<sup>64</sup> Despite this, the consent form will alert parents to the potential of diarrhea.

## Adverse events

All adverse events will be reported to the Hospital for Sick Children or St. Michael's Hospital Research Ethics Board according to their adverse event reporting requirements. All adverse drug reactions to the study medication will be reported to Health Canada within 15 calendar days or for death or life-threatening events, within 7 calendar days. In the latter case, a follow-up report must be filed within 8 calendar days. Serious adverse events and serious unexpected adverse events will be reported to the Natural and Non-prescription Health Products Directorate (NNHPD) in an expedited manner.

To maintain the overall quality of the trial, unblinding will only be performed in exceptional circumstances when knowledge of the actual treatment is essential for management of the patient. If unblinding is deemed to be necessary by the investigator, the investigator will contact the coordinating center by telephone to ascertain the allocation group and communicate this to the participant's clinician and caregiver. The research staff will not be informed of the allocation group. Unblinding will not necessarily be a reason for discontinuation or exclusion from the analysis.

## Management

The Applied Health Research Centre (AHRC) will be responsible for trial data coordination, database development, data management and statistical analysis. Study data and patient surveys will be entered and maintained on a secure password protected database developed using REDCap® ([www.project-redcap.org](http://www.project-redcap.org)) and will be accessible via the internet for data entry purposes. Quality and completeness of data entry will be reviewed as soon as possible after data entry, within 5 business days of data entry for the first 5 participants randomized at each site, and within 15 days of data entry thereafter. Corrections or changes in REDCap® are tracked with the retention of the original data and the corrected data with the date of data entry and submitting personnel.

## Ethics and dissemination

1  
2  
3 The *TARGet Kids!* research platform has been approved by the Research Ethics Board at the  
4 Hospital for Sick Children and St Michael's Hospital, as well as the other affiliated sites. Ethics  
5 approval for this study has been obtained for all participating sites. Results of the study will be  
6 submitted for publication to a peer-reviewed journal and will be discussed policy and decision  
7 makers.  
8  
9

## 10 SUMMARY

11 In summary, AOM, URTIs and dental caries are common and costly conditions in young  
12 children that might be prevented by regular xylitol use. Existing evidence indicates clinical  
13 equipoise on the efficacy of xylitol syrup in preventing AOM, URTIs and dental caries in  
14 preschool aged children. Evidence from previous long-term trials of xylitol for the prevention of  
15 dental caries has demonstrated that the intervention is well tolerated and feasible in this age  
16 group. The *TARGet Kids!* research network has a demonstrated record of conducting RCTs in  
17 young children and its existing research infrastructure will be mobilized to ensure that this trial  
18 will be completed efficiently and on schedule.  
19

20 AOM and URTIs are commonly viewed as unavoidable during early childhood. This trial  
21 has the potential to transform the approach to these three common conditions.  
22  
23

## 24 Author Contributions

25 The following authors contributed substantially to conception and the design of the protocol: NP,  
26 AL, AA, CB, JH, WI, JM, MM, KT, CA, DM, CK, FB, and PP.

27 The following authors drafted the manuscript: NP and FB.

28 The following authors revised the manuscript critically for important intellectual content: NP,  
29 AL, AA, CB, JH, WI, JM, MM, KT, CA, DM, CK, FB, and PP.

30 The following authors approved the final manuscript: NP, AL, AA, CB, JH, WI, JM, MM, KT,  
31 CA, DM, CK, FB, PP.  
32

33 The following authors are accountable for all aspects of the work in ensuring that questions  
34 related to the accuracy or integrity of any part of the work are appropriately investigated and  
35 resolved: NP, AL, AA, CB, JH, WI, JM, MM, KT, CA, DM, CK, FB, and PP.  
36  
37

## 38 Funding

39 The study is funded by the Canadian Institutes of Health Research (CIHR). NP received salary  
40 support from a CIHR RCT training grant and from a PSI Graham Farquharson Knowledge  
41 Translation Fellowship.  
42  
43

## 44 Competing interests

45 There are no competing interests.  
46  
47  
48

## 49 REFERENCES

- 50  
51 1. Dube E, De Wals P, Gilca V, et al. Burden of acute otitis media on Canadian families. *Can Fam*  
52 *Physician* 2011;57(1):60-5.  
53  
54 2. Monasta L, Ronfani L, Marchetti F, et al. Burden of disease caused by otitis media: systematic review  
55 and global estimates. *PLoS One* 2012;7(4):e36226. doi: 10.1371/journal.pone.0036226  
56  
57  
58  
59

3. Teele DW, Klein JO, Rosner B. Epidemiology of otitis media during the first seven years of life in children in greater Boston: a prospective, cohort study. *J Infect Dis* 1989;160(1):83-94.
4. Venekamp RP, Sanders S, Glasziou PP, et al. Antibiotics for acute otitis media in children. *Cochrane Database Syst Rev* 2013(1):CD000219. doi: 10.1002/14651858.CD000219.pub3
5. Anthonsen K, Hostmark K, Hansen S, et al. Acute mastoiditis in children: a 10-year retrospective and validated multicenter study. *Pediatr Infect Dis J* 2013;32(5):436-40. doi: 10.1097/INF.0b013e31828abd13
6. Palma S, Bovo R, Benatti A, et al. Mastoiditis in adults: a 19-year retrospective study. *Eur Arch Otorhinolaryngol* 2014;271(5):925-31. doi: 10.1007/s00405-013-2454-8
7. Kvaerner KJ, Austeng ME, Abdelnoor M. Hospitalization for acute otitis media as a useful marker for disease severity. *Pediatr Infect Dis J* 2013;32(9):946-9. doi: 10.1097/INF.0b013e318297c436
8. Heikkinen T, Jarvinen A. The common cold. *Lancet* 2003;361(9351):51-9. doi: 10.1016/S0140-6736(03)12162-9
9. Lambert SB, Allen KM, Druce JD, et al. Community epidemiology of human metapneumovirus, human coronavirus NL63, and other respiratory viruses in healthy preschool-aged children using parent-collected specimens. *Pediatrics* 2007;120(4):e929-37. doi: 10.1542/peds.2006-3703
10. Lambert SB, Allen KM, Carter RC, et al. The cost of community-managed viral respiratory illnesses in a cohort of healthy preschool-aged children. *Respir Res* 2008;9:11. doi: 10.1186/1465-9921-9-11
11. Kvaerner KJ, Nafstad P, Jaakkola JJ. Upper respiratory morbidity in preschool children: a cross-sectional study. *Arch Otolaryngol Head Neck Surg* 2000;126(10):1201-6.
12. Hendley JO. Epidemiology, pathogenesis, and treatment of the common cold. *Seminars in Pediatric Infectious Diseases* 1998;9(1):50-55. doi: 10.1016/S1045-1870(98)80051-4
13. Burt CW, McCaig LF, Rechtsteiner EA. Ambulatory medical care utilization estimates for 2005. *Adv Data* 2007(388):1-15.
14. Vingilis E, Brown U, Koeppen R, et al. Evaluation of a cold/flu self-care public education campaign. *Health Educ Res* 1998;13(1):33-46.
15. Canadian Institute of Health Information. National Ambulatory Care Reporting System. 2005
16. Shah CP, Chipman ML, Pizzarello LD. The cost of upper respiratory tract infections in Canadian children. *J Otolaryngol* 1976;5(6):505-12.
17. Thomas E. Recent trends in upper respiratory infections, ear infections and asthma among young Canadian children *Health Reports* 2010;21(4)
18. National Center for Caries Disease Prevention and Health Promotion. Oral Health Resources - Children's Oral Health Overview. 2006
19. Nunn ME, Dietrich T, Singh HK, et al. Prevalence of early childhood caries among very young urban Boston children compared with US children. *J Public Health Dent* 2009;69(3):156-62. doi: 10.1111/j.1752-7325.2008.00116.x
20. Griffin SO, Gooch BF, Beltran E, et al. Dental services, costs, and factors associated with hospitalization for Medicaid-eligible children, Louisiana 1996-97. *J Public Health Dent* 2000;60(1):21-7.
21. Casamassimo PS, Thikkurissy S, Edelstein BL, et al. Beyond the dmft: the human and economic cost of early childhood caries. *J Am Dent Assoc* 2009;140(6):650-7.
22. Ettlbrick KL, Webb MD, Seale NS. Hospital charges for dental caries related emergency admissions. *Pediatr Dent* 2000;22(1):21-5.
23. Bruerd B JC, Krise D. Preventing Baby Bottle Tooth Decay and Early Childhood Caries Among AI/AN Infants and Children. *The IHS Primary Care Provider* 1997;23(3):37-39.
24. Association of Dental Surgeons of British Columbia. Children's dentistry task force report. 2001
25. Bertness JH, K. Promoting awareness, preventing pain: Facts on early childhood caries (ECC) (2nd ed.). *National Maternal and Child Oral Health Resource Center* 2004

- 1
- 2
- 3
- 4 26. Kontiokari T, Uhari M, Koskela M. Antiadhesive effects of xylitol on otopathogenic bacteria. *J*
- 5 *Antimicrob Chemother* 1998;41(5):563-5.
- 6 27. Azarpazhooh A, Lawrence HP, Shah PS. Xylitol for preventing acute otitis media in children up to 12
- 7 years of age. *Cochrane Database Syst Rev* 2016(8):CD007095. doi:
- 8 10.1002/14651858.CD007095.pub3
- 9 28. Kandelman D, Gagnon G. A 24-month clinical study of the incidence and progression of dental caries
- 10 in relation to consumption of chewing gum containing xylitol in school preventive programs. *J*
- 11 *Dent Res* 1990;69(11):1771-5. doi: 10.1177/00220345900690111201
- 12 29. Mickenautsch S, Leal SC, Yengopal V, et al. Sugar-free chewing gum and dental caries: a systematic
- 13 review. *J Appl Oral Sci* 2007;15(2):83-8.
- 14 30. Makinen KK, Jarvinen KL, Anttila CH, et al. Topical xylitol administration by parents for the promotion
- 15 of oral health in infants: a caries prevention experiment at a Finnish Public Health Centre. *Int*
- 16 *Dent J* 2013;63(4):210-24. doi: 10.1111/idj.12038
- 17 31. Azarpazhooh A, Limeback H, Lawrence HP, et al. Xylitol for preventing acute otitis media in children
- 18 up to 12 years of age. *Cochrane Database Syst Rev* 2011(11):CD007095. doi:
- 19 10.1002/14651858.CD007095.pub2
- 20 32. Vernacchio L, Vezina RM, Mitchell AA. Tolerability of oral xylitol solution in young children:
- 21 implications for otitis media prophylaxis. *Int J Pediatr Otorhinolaryngol* 2007;71(1):89-94. doi:
- 22 10.1016/j.ijporl.2006.09.008
- 23 33. Soderling E. Controversies around Xylitol. *Eur J Dent* 2009;3(2):81-2.
- 24 34. Tahtinen PA, Laine MK, Ruuskanen O, et al. Delayed versus immediate antimicrobial treatment for
- 25 acute otitis media. *Pediatr Infect Dis J* 2012;31(12):1227-32. doi:
- 26 10.1097/INF.0b013e318266af2c
- 27 35. American Academy of Pediatric Dentistry. Guideline on Xylitol Use in Caries Prevention. 2011
- 28 36. Danhauer JL, Johnson CE, Rotan SN, et al. National survey of pediatricians' opinions about and
- 29 practices for acute otitis media and xylitol use. *J Am Acad Audiol* 2010;21(5):329-46. doi:
- 30 10.3766/jaaa.21.5.5
- 31 37. Ly KA, Milgrom P, Rothen M. The potential of dental-protective chewing gum in oral health
- 32 interventions. *J Am Dent Assoc* 2008;139(5):553-63.
- 33 38. Maguire A, Rugg-Gunn AJ. Xylitol and caries prevention--is it a magic bullet? *Br Dent J*
- 34 2003;194(8):429-36. doi: 10.1038/sj.bdj.4810022
- 35 39. Stockmann C, Ampofo K, Hersh AL, et al. Seasonality of acute otitis media and the role of respiratory
- 36 viral activity in children. *Pediatr Infect Dis J* 2013;32(4):314-9. doi:
- 37 10.1097/INF.0b013e31827d104e
- 38 40. Pichichero ME, Casey JR. Comparison of study designs for acute otitis media trials. *Int J Pediatr*
- 39 *Otorhinolaryngol* 2008;72(6):737-50. doi: 10.1016/j.ijporl.2008.02.020
- 40 41. Spiro DM, King WD, Arnold DH, et al. A randomized clinical trial to assess the effects of
- 41 tympanometry on the diagnosis and treatment of acute otitis media. *Pediatrics*
- 42 2004;114(1):177-81.
- 43 42. Spurling GK, Del Mar CB, Dooley L, et al. Delayed antibiotics for respiratory infections. *Cochrane*
- 44 *Database Syst Rev* 2013(4):CD004417. doi: 10.1002/14651858.CD004417.pub4
- 45 43. Little P, Gould C, Williamson I, et al. Pragmatic randomised controlled trial of two prescribing
- 46 strategies for childhood acute otitis media. *BMJ* 2001;322(7282):336-42.
- 47 44. Uhari M, Kontiokari T, Koskela M, et al. Xylitol chewing gum in prevention of acute otitis media:
- 48 double blind randomised trial. *BMJ* 1996;313(7066):1180-4.
- 49 45. Lyon JL, Ashton A, Turner B, et al. Variation in the diagnosis of upper respiratory tract infections and
- 50 otitis media in an urgent medical care practice. *Arch Fam Med* 1998;7(3):249-54.
- 51 46. Haskins R. Acute illness in day care: how much does it cost? *Bull N Y Acad Med* 1989;65(3):319-43.
- 52
- 53
- 54
- 55
- 56
- 57
- 58
- 59
- 60

- 1
- 2
- 3 47. Saunders NR, Tennis O, Jacobson S, et al. Parents' responses to symptoms of respiratory tract
- 4 infection in their children. *CMAJ* 2003;168(1):25-30.
- 5 48. McWilliams CJ, Goldman RD. Update on acute otitis media in children younger than 2 years of age.
- 6 *Can Fam Physician* 2011;57(11):1283-5.
- 7 49. Heikkinen T, Ruuskanen O. Signs and symptoms predicting acute otitis media. *Arch Pediatr Adolesc*
- 8 *Med* 1995;149(1):26-9.
- 9 50. Niemela M, Uhari M, Mottonen M, et al. Costs arising from otitis media. *Acta Paediatr*
- 10 1999;88(5):553-6.
- 11 51. Dales RE, Cakmak S, Brand K, et al. Respiratory illness in children attending daycare. *Pediatr*
- 12 *Pulmonol* 2004;38(1):64-9. doi: 10.1002/ppul.20034
- 13 52. Quach C, Moore D, Ducharme F, et al. Do pediatric emergency departments pose a risk of infection?
- 14 *BMC Pediatr* 2011;11:2. doi: 10.1186/1471-2431-11-2
- 15 53. Vissing NH, Jensen SM, Bisgaard H. Validity of information on atopic disease and other illness in
- 16 young children reported by parents in a prospective birth cohort study. *BMC Med Res Methodol*
- 17 2012;12:160. doi: 10.1186/1471-2288-12-160
- 18 54. Jacobs B, Young NL, Dick PT, et al. Canadian Acute Respiratory Illness and Flu Scale (CARIFS):
- 19 development of a valid measure for childhood respiratory infections. *J Clin Epidemiol*
- 20 2000;53(8):793-9.
- 21 55. Roberts CR, Warren JJ, Weber-Gasparoni K. Relationships between caregivers' responses to oral
- 22 health screening questions and early childhood caries. *J Public Health Dent* 2009;69(4):290-3.
- 23 doi: 10.1111/j.1752-7325.2009.00126.x
- 24 56. Sealy PA, Farrell N, Hoogenboom A. Caregiver self-report of children's use of the sippy cup among
- 25 children 1 to 4 years of age. *J Pediatr Nurs* 2011;26(3):200-5. doi: 10.1016/j.pedn.2009.11.001
- 26 57. Nelson DE, Holtzman D, Bolen J, et al. Reliability and validity of measures from the Behavioral Risk
- 27 Factor Surveillance System (BRFSS). *Soz Präventivmed* 2001;46 Suppl 1:S3-42.
- 28 58. Toronto Public Health. Toronto Perinatal and Child Health Survey 2003. 2005
- 29 59. Hoch JS, Briggs AH, Willan AR. Something old, something new, something borrowed, something blue:
- 30 a framework for the marriage of health econometrics and cost-effectiveness analysis. *Health*
- 31 *Econ* 2002;11(5):415-30. doi: 10.1002/hec.678
- 32 60. Hoch JS, Rockx MA, Krahn AD. Using the net benefit regression framework to construct cost-
- 33 effectiveness acceptability curves: an example using data from a trial of external loop recorders
- 34 versus Holter monitoring for ambulatory monitoring of "community acquired" syncope. *BMC*
- 35 *Health Serv Res* 2006;6:68. doi: 10.1186/1472-6963-6-68
- 36 61. Hautalahti O, Renko M, Tapiainen T, et al. Failure of xylitol given three times a day for preventing
- 37 acute otitis media. *Pediatr Infect Dis J* 2007;26(5):423-7. doi:
- 38 10.1097/01.inf.0000259956.21859.dd
- 39 62. Maguire JL, Birken CS, Loeb MB, et al. DO IT Trial: vitamin D Outcomes and Interventions in Toddlers
- 40 - a TARGet Kids! randomized controlled trial. *BMC Pediatr* 2014;14:37. doi: 10.1186/1471-2431-
- 41 14-37
- 42 63. Akerblom HK, Koivukangas T, Puukka R, et al. The tolerance of increasing amounts of dietary xylitol
- 43 in children. *Int J Vitam Nutr Res Suppl* 1982;22:53-66.
- 44 64. Vernacchio L, Corwin MJ, Vezina RM, et al. Xylitol syrup for the prevention of acute otitis media.
- 45 *Pediatrics* 2014;133(2):289-95. doi: 10.1542/peds.2013-2373
- 46
- 47
- 48
- 49
- 50
- 51
- 52
- 53
- 54
- 55
- 56
- 57
- 58
- 59
- 60



## Appendix 1. Outcome determinations

### Primary outcome: number of episodes of physician diagnosed AOM

Information will be obtained from the chart review at the end of the study period.

(1) Does chart entry included diagnosis or assessment of “AOM” or “acute otitis media”? [Yes or No]

(2) Does a chart entry within 48 hours record physical examination findings of the tympanic membrane? [Yes or No]

*If, and only if, answers to both question are “Yes”, add one to total number of AOM episodes. Proceed to review the next chart entry until all chart entries during the study period have been reviewed.*

### Secondary outcome: number of parent reported URTIs

Information will be obtained via monthly telephone calls.

(1) Has the child had any of the symptoms for two consecutive days?

- stuffy nose or congestion or rhinorrhea
- cough
- sore throat
- wheeze
- shortness of breath

*If the child has had any of the above symptoms for two consecutive days, add one to the total number of parent reported URTI episodes.*

(2) Was the child well (symptom free) for two consecutive days during the illness?

*If the child was well for two consecutive days, add another one to the total number of parent reported URTI episodes (as this is a separate URTI) and repeat step (2) if needed.*

### Secondary outcome: parent reported dental caries (binary)

Information will be obtained via monthly telephone calls.

Have the parents or caregivers ever been told by a dentist or a physician that the child has or has had:

- dental caries
- multiple dental caries
- early childhood caries or ECC

1  
2  
3 *If the parents or caregivers have been told that the child has any of the above record the child as*  
4 *having dental caries (and in this case the parents and caregivers do not need to be asked about*  
5 *this on subsequent calls).*  
6

7  
8 Note that this outcome will also be assessed at baseline so that children with dental caries at  
9 baseline can be excluded from the dental caries analysis. This is because the outcome is binary  
10 (caries or not). Based on information available about children in the TARGet Kids! network, we  
11 expect 5-8 % of children to have caries at baseline and to be excluded from the dental caries  
12 analysis. Of course, all children will be included in the primary AOM analysis (and in the URTI  
13 analysis) regardless of whether they have had dental caries.  
14  
15  
16  
17  
18  
19  
20  
21  
22  
23  
24  
25  
26  
27  
28  
29  
30  
31  
32  
33  
34  
35  
36  
37  
38  
39  
40  
41  
42  
43  
44  
45  
46  
47  
48  
49  
50  
51  
52  
53  
54  
55  
56  
57  
58  
59  
60

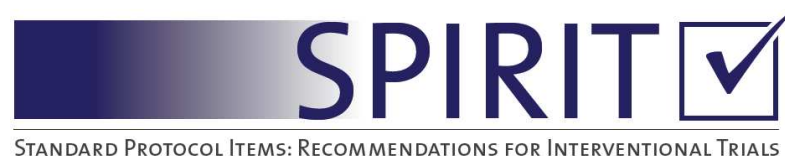

SPIRIT 2013 Checklist: Recommended items to address in a clinical trial protocol and related documents\*

| Section/item                      | Item No | Description                                                                                                                                                                                                                                                                              | Addressed on page number |
|-----------------------------------|---------|------------------------------------------------------------------------------------------------------------------------------------------------------------------------------------------------------------------------------------------------------------------------------------------|--------------------------|
| <b>Administrative information</b> |         |                                                                                                                                                                                                                                                                                          |                          |
| Title                             | 1       | Descriptive title identifying the study design, population, interventions, and, if applicable, trial acronym                                                                                                                                                                             | 1                        |
| Trial registration                | 2a      | Trial identifier and registry name. If not yet registered, name of intended registry                                                                                                                                                                                                     | 2                        |
|                                   | 2b      | All items from the World Health Organization Trial Registration Data Set                                                                                                                                                                                                                 | N/A                      |
| Protocol version                  | 3       | Date and version identifier                                                                                                                                                                                                                                                              | N/A                      |
| Funding                           | 4       | Sources and types of financial, material, and other support                                                                                                                                                                                                                              | 11                       |
| Roles and responsibilities        | 5a      | Names, affiliations, and roles of protocol contributors                                                                                                                                                                                                                                  | 1                        |
|                                   | 5b      | Name and contact information for the trial sponsor                                                                                                                                                                                                                                       | 1                        |
|                                   | 5c      | Role of study sponsor and funders, if any, in study design; collection, management, analysis, and interpretation of data; writing of the report; and the decision to submit the report for publication, including whether they will have ultimate authority over any of these activities | N/A                      |
|                                   | 5d      | Composition, roles, and responsibilities of the coordinating centre, steering committee, endpoint adjudication committee, data management team, and other individuals or groups overseeing the trial, if applicable (see Item 21a for data monitoring committee)                         | 5,10                     |

## Introduction

|                          |    |                                                                                                                                                                                                           |     |
|--------------------------|----|-----------------------------------------------------------------------------------------------------------------------------------------------------------------------------------------------------------|-----|
| Background and rationale | 6a | Description of research question and justification for undertaking the trial, including summary of relevant studies (published and unpublished) examining benefits and harms for each intervention        | 2-4 |
|                          | 6b | Explanation for choice of comparators                                                                                                                                                                     | 2-4 |
| Objectives               | 7  | Specific objectives or hypotheses                                                                                                                                                                         | 4   |
| Trial design             | 8  | Description of trial design including type of trial (eg, parallel group, crossover, factorial, single group), allocation ratio, and framework (eg, superiority, equivalence, noninferiority, exploratory) | 4   |

## Methods: Participants, interventions, and outcomes

|                      |     |                                                                                                                                                                                                                                                                                                                                                                                |      |
|----------------------|-----|--------------------------------------------------------------------------------------------------------------------------------------------------------------------------------------------------------------------------------------------------------------------------------------------------------------------------------------------------------------------------------|------|
| Study setting        | 9   | Description of study settings (eg, community clinic, academic hospital) and list of countries where data will be collected. Reference to where list of study sites can be obtained                                                                                                                                                                                             | 4    |
| Eligibility criteria | 10  | Inclusion and exclusion criteria for participants. If applicable, eligibility criteria for study centres and individuals who will perform the interventions (eg, surgeons, psychotherapists)                                                                                                                                                                                   | 4-5  |
| Interventions        | 11a | Interventions for each group with sufficient detail to allow replication, including how and when they will be administered                                                                                                                                                                                                                                                     | 5-6  |
|                      | 11b | Criteria for discontinuing or modifying allocated interventions for a given trial participant (eg, drug dose change in response to harms, participant request, or improving/worsening disease)                                                                                                                                                                                 | 6    |
|                      | 11c | Strategies to improve adherence to intervention protocols, and any procedures for monitoring adherence (eg, drug tablet return, laboratory tests)                                                                                                                                                                                                                              | 5-6  |
|                      | 11d | Relevant concomitant care and interventions that are permitted or prohibited during the trial                                                                                                                                                                                                                                                                                  | 5,10 |
| Outcomes             | 12  | Primary, secondary, and other outcomes, including the specific measurement variable (eg, systolic blood pressure), analysis metric (eg, change from baseline, final value, time to event), method of aggregation (eg, median, proportion), and time point for each outcome. Explanation of the clinical relevance of chosen efficacy and harm outcomes is strongly recommended | 6-8  |
| Participant timeline | 13  | Time schedule of enrolment, interventions (including any run-ins and washouts), assessments, and visits for participants. A schematic diagram is highly recommended (see Figure)                                                                                                                                                                                               | 5-6  |

|    |                                                                     |     |                                                                                                                                                                                                                                                                                                                                                                                                              |             |
|----|---------------------------------------------------------------------|-----|--------------------------------------------------------------------------------------------------------------------------------------------------------------------------------------------------------------------------------------------------------------------------------------------------------------------------------------------------------------------------------------------------------------|-------------|
| 1  |                                                                     |     |                                                                                                                                                                                                                                                                                                                                                                                                              |             |
| 2  |                                                                     |     |                                                                                                                                                                                                                                                                                                                                                                                                              |             |
| 3  | Sample size                                                         | 14  | Estimated number of participants needed to achieve study objectives and how it was determined, including clinical and statistical assumptions supporting any sample size calculations                                                                                                                                                                                                                        | 8-9         |
| 4  |                                                                     |     |                                                                                                                                                                                                                                                                                                                                                                                                              |             |
| 5  | Recruitment                                                         | 15  | Strategies for achieving adequate participant enrolment to reach target sample size                                                                                                                                                                                                                                                                                                                          | 2,9,        |
| 6  |                                                                     |     |                                                                                                                                                                                                                                                                                                                                                                                                              |             |
| 7  |                                                                     |     |                                                                                                                                                                                                                                                                                                                                                                                                              |             |
| 8  | <b>Methods: Assignment of interventions (for controlled trials)</b> |     |                                                                                                                                                                                                                                                                                                                                                                                                              |             |
| 9  |                                                                     |     |                                                                                                                                                                                                                                                                                                                                                                                                              |             |
| 10 | Allocation:                                                         |     |                                                                                                                                                                                                                                                                                                                                                                                                              |             |
| 11 |                                                                     |     |                                                                                                                                                                                                                                                                                                                                                                                                              |             |
| 12 | Sequence generation                                                 | 16a | Method of generating the allocation sequence (eg, computer-generated random numbers), and list of any factors for stratification. To reduce predictability of a random sequence, details of any planned restriction (eg, blocking) should be provided in a separate document that is unavailable to those who enrol participants or assign interventions                                                     | 4-5,9       |
| 13 |                                                                     |     |                                                                                                                                                                                                                                                                                                                                                                                                              |             |
| 14 |                                                                     |     |                                                                                                                                                                                                                                                                                                                                                                                                              |             |
| 15 |                                                                     |     |                                                                                                                                                                                                                                                                                                                                                                                                              |             |
| 16 |                                                                     |     |                                                                                                                                                                                                                                                                                                                                                                                                              |             |
| 17 | Allocation concealment mechanism                                    | 16b | Mechanism of implementing the allocation sequence (eg, central telephone; sequentially numbered, opaque, sealed envelopes), describing any steps to conceal the sequence until interventions are assigned                                                                                                                                                                                                    | 2, 5, 9, 10 |
| 18 |                                                                     |     |                                                                                                                                                                                                                                                                                                                                                                                                              |             |
| 19 |                                                                     |     |                                                                                                                                                                                                                                                                                                                                                                                                              |             |
| 20 |                                                                     |     |                                                                                                                                                                                                                                                                                                                                                                                                              |             |
| 21 | Implementation                                                      | 16c | Who will generate the allocation sequence, who will enrol participants, and who will assign participants to interventions                                                                                                                                                                                                                                                                                    | 5           |
| 22 |                                                                     |     |                                                                                                                                                                                                                                                                                                                                                                                                              |             |
| 23 |                                                                     |     |                                                                                                                                                                                                                                                                                                                                                                                                              |             |
| 24 | Blinding (masking)                                                  | 17a | Who will be blinded after assignment to interventions (eg, trial participants, care providers, outcome assessors, data analysts), and how                                                                                                                                                                                                                                                                    | 4           |
| 25 |                                                                     |     |                                                                                                                                                                                                                                                                                                                                                                                                              |             |
| 26 |                                                                     |     |                                                                                                                                                                                                                                                                                                                                                                                                              |             |
| 27 |                                                                     | 17b | If blinded, circumstances under which unblinding is permissible, and procedure for revealing a participant's allocated intervention during the trial                                                                                                                                                                                                                                                         | 10          |
| 28 |                                                                     |     |                                                                                                                                                                                                                                                                                                                                                                                                              |             |
| 29 |                                                                     |     |                                                                                                                                                                                                                                                                                                                                                                                                              |             |
| 30 |                                                                     |     |                                                                                                                                                                                                                                                                                                                                                                                                              |             |
| 31 | <b>Methods: Data collection, management, and analysis</b>           |     |                                                                                                                                                                                                                                                                                                                                                                                                              |             |
| 32 |                                                                     |     |                                                                                                                                                                                                                                                                                                                                                                                                              |             |
| 33 | Data collection methods                                             | 18a | Plans for assessment and collection of outcome, baseline, and other trial data, including any related processes to promote data quality (eg, duplicate measurements, training of assessors) and a description of study instruments (eg, questionnaires, laboratory tests) along with their reliability and validity, if known. Reference to where data collection forms can be found, if not in the protocol | 6-8         |
| 34 |                                                                     |     |                                                                                                                                                                                                                                                                                                                                                                                                              |             |
| 35 |                                                                     |     |                                                                                                                                                                                                                                                                                                                                                                                                              |             |
| 36 |                                                                     |     |                                                                                                                                                                                                                                                                                                                                                                                                              |             |
| 37 |                                                                     |     |                                                                                                                                                                                                                                                                                                                                                                                                              |             |
| 38 |                                                                     | 18b | Plans to promote participant retention and complete follow-up, including list of any outcome data to be collected for participants who discontinue or deviate from intervention protocols                                                                                                                                                                                                                    | 6-8         |
| 39 |                                                                     |     |                                                                                                                                                                                                                                                                                                                                                                                                              |             |
| 40 |                                                                     |     |                                                                                                                                                                                                                                                                                                                                                                                                              |             |
| 41 |                                                                     |     |                                                                                                                                                                                                                                                                                                                                                                                                              |             |
| 42 |                                                                     |     |                                                                                                                                                                                                                                                                                                                                                                                                              |             |
| 43 |                                                                     |     |                                                                                                                                                                                                                                                                                                                                                                                                              |             |
| 44 |                                                                     |     |                                                                                                                                                                                                                                                                                                                                                                                                              |             |
| 45 |                                                                     |     |                                                                                                                                                                                                                                                                                                                                                                                                              |             |
| 46 |                                                                     |     |                                                                                                                                                                                                                                                                                                                                                                                                              |             |
| 47 |                                                                     |     |                                                                                                                                                                                                                                                                                                                                                                                                              |             |

|    |                                 |     |                                                                                                                                                                                                                                                                                                                                       |       |
|----|---------------------------------|-----|---------------------------------------------------------------------------------------------------------------------------------------------------------------------------------------------------------------------------------------------------------------------------------------------------------------------------------------|-------|
| 1  |                                 |     |                                                                                                                                                                                                                                                                                                                                       |       |
| 2  |                                 |     |                                                                                                                                                                                                                                                                                                                                       |       |
| 3  | Data management                 | 19  | Plans for data entry, coding, security, and storage, including any related processes to promote data quality (eg, double data entry; range checks for data values). Reference to where details of data management procedures can be found, if not in the protocol                                                                     | 10    |
| 4  |                                 |     |                                                                                                                                                                                                                                                                                                                                       |       |
| 5  |                                 |     |                                                                                                                                                                                                                                                                                                                                       |       |
| 6  |                                 |     |                                                                                                                                                                                                                                                                                                                                       |       |
| 7  | Statistical methods             | 20a | Statistical methods for analysing primary and secondary outcomes. Reference to where other details of the statistical analysis plan can be found, if not in the protocol                                                                                                                                                              | 9     |
| 8  |                                 |     |                                                                                                                                                                                                                                                                                                                                       |       |
| 9  |                                 |     |                                                                                                                                                                                                                                                                                                                                       |       |
| 10 |                                 | 20b | Methods for any additional analyses (eg, subgroup and adjusted analyses)                                                                                                                                                                                                                                                              | 9     |
| 11 |                                 |     |                                                                                                                                                                                                                                                                                                                                       |       |
| 12 |                                 | 20c | Definition of analysis population relating to protocol non-adherence (eg, as randomised analysis), and any statistical methods to handle missing data (eg, multiple imputation)                                                                                                                                                       | 9     |
| 13 |                                 |     |                                                                                                                                                                                                                                                                                                                                       |       |
| 14 |                                 |     |                                                                                                                                                                                                                                                                                                                                       |       |
| 15 | <b>Methods: Monitoring</b>      |     |                                                                                                                                                                                                                                                                                                                                       |       |
| 16 |                                 |     |                                                                                                                                                                                                                                                                                                                                       |       |
| 17 | Data monitoring                 | 21a | Composition of data monitoring committee (DMC); summary of its role and reporting structure; statement of whether it is independent from the sponsor and competing interests; and reference to where further details about its charter can be found, if not in the protocol. Alternatively, an explanation of why a DMC is not needed | N/A   |
| 18 |                                 |     |                                                                                                                                                                                                                                                                                                                                       |       |
| 19 |                                 |     |                                                                                                                                                                                                                                                                                                                                       |       |
| 20 |                                 |     |                                                                                                                                                                                                                                                                                                                                       |       |
| 21 |                                 |     |                                                                                                                                                                                                                                                                                                                                       |       |
| 22 |                                 | 21b | Description of any interim analyses and stopping guidelines, including who will have access to these interim results and make the final decision to terminate the trial                                                                                                                                                               | 10    |
| 23 |                                 |     |                                                                                                                                                                                                                                                                                                                                       |       |
| 24 |                                 |     |                                                                                                                                                                                                                                                                                                                                       |       |
| 25 | Harms                           | 22  | Plans for collecting, assessing, reporting, and managing solicited and spontaneously reported adverse events and other unintended effects of trial interventions or trial conduct                                                                                                                                                     | 10    |
| 26 |                                 |     |                                                                                                                                                                                                                                                                                                                                       |       |
| 27 |                                 |     |                                                                                                                                                                                                                                                                                                                                       |       |
| 28 | Auditing                        | 23  | Frequency and procedures for auditing trial conduct, if any, and whether the process will be independent from investigators and the sponsor                                                                                                                                                                                           | N/A   |
| 29 |                                 |     |                                                                                                                                                                                                                                                                                                                                       |       |
| 30 |                                 |     |                                                                                                                                                                                                                                                                                                                                       |       |
| 31 |                                 |     |                                                                                                                                                                                                                                                                                                                                       |       |
| 32 | <b>Ethics and dissemination</b> |     |                                                                                                                                                                                                                                                                                                                                       |       |
| 33 |                                 |     |                                                                                                                                                                                                                                                                                                                                       |       |
| 34 | Research ethics approval        | 24  | Plans for seeking research ethics committee/institutional review board (REC/IRB) approval                                                                                                                                                                                                                                             | 10-11 |
| 35 |                                 |     |                                                                                                                                                                                                                                                                                                                                       |       |
| 36 |                                 |     |                                                                                                                                                                                                                                                                                                                                       |       |
| 37 | Protocol amendments             | 25  | Plans for communicating important protocol modifications (eg, changes to eligibility criteria, outcomes, analyses) to relevant parties (eg, investigators, REC/IRBs, trial participants, trial registries, journals, regulators)                                                                                                      | 10-11 |
| 38 |                                 |     |                                                                                                                                                                                                                                                                                                                                       |       |
| 39 |                                 |     |                                                                                                                                                                                                                                                                                                                                       |       |
| 40 |                                 |     |                                                                                                                                                                                                                                                                                                                                       |       |
| 41 |                                 |     |                                                                                                                                                                                                                                                                                                                                       |       |
| 42 |                                 |     |                                                                                                                                                                                                                                                                                                                                       |       |
| 43 |                                 |     |                                                                                                                                                                                                                                                                                                                                       |       |
| 44 |                                 |     |                                                                                                                                                                                                                                                                                                                                       |       |
| 45 |                                 |     |                                                                                                                                                                                                                                                                                                                                       |       |
| 46 |                                 |     |                                                                                                                                                                                                                                                                                                                                       |       |
| 47 |                                 |     |                                                                                                                                                                                                                                                                                                                                       |       |

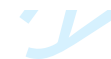

|    |                               |     |                                                                                                                                                                                                                                                                                     |       |
|----|-------------------------------|-----|-------------------------------------------------------------------------------------------------------------------------------------------------------------------------------------------------------------------------------------------------------------------------------------|-------|
| 1  |                               |     |                                                                                                                                                                                                                                                                                     |       |
| 2  |                               |     |                                                                                                                                                                                                                                                                                     |       |
| 3  | Consent or assent             | 26a | Who will obtain informed consent or assent from potential trial participants or authorised surrogates, and how (see Item 32)                                                                                                                                                        | 9     |
| 4  |                               |     |                                                                                                                                                                                                                                                                                     |       |
| 5  |                               |     |                                                                                                                                                                                                                                                                                     |       |
| 6  |                               | 26b | Additional consent provisions for collection and use of participant data and biological specimens in ancillary studies, if applicable                                                                                                                                               | N/A   |
| 7  |                               |     |                                                                                                                                                                                                                                                                                     |       |
| 8  |                               |     |                                                                                                                                                                                                                                                                                     |       |
| 9  | Confidentiality               | 27  | How personal information about potential and enrolled participants will be collected, shared, and maintained in order to protect confidentiality before, during, and after the trial                                                                                                | 6,10  |
| 10 |                               |     |                                                                                                                                                                                                                                                                                     |       |
| 11 |                               |     |                                                                                                                                                                                                                                                                                     |       |
| 12 | Declaration of interests      | 28  | Financial and other competing interests for principal investigators for the overall trial and each study site                                                                                                                                                                       | 11    |
| 13 |                               |     |                                                                                                                                                                                                                                                                                     |       |
| 14 |                               |     |                                                                                                                                                                                                                                                                                     |       |
| 15 | Access to data                | 29  | Statement of who will have access to the final trial dataset, and disclosure of contractual agreements that limit such access for investigators                                                                                                                                     | 10,11 |
| 16 |                               |     |                                                                                                                                                                                                                                                                                     |       |
| 17 |                               |     |                                                                                                                                                                                                                                                                                     |       |
| 18 | Ancillary and post-trial care | 30  | Provisions, if any, for ancillary and post-trial care, and for compensation to those who suffer harm from trial participation                                                                                                                                                       | N/A   |
| 19 |                               |     |                                                                                                                                                                                                                                                                                     |       |
| 20 |                               |     |                                                                                                                                                                                                                                                                                     |       |
| 21 | Dissemination policy          | 31a | Plans for investigators and sponsor to communicate trial results to participants, healthcare professionals, the public, and other relevant groups (eg, via publication, reporting in results databases, or other data sharing arrangements), including any publication restrictions | 11    |
| 22 |                               |     |                                                                                                                                                                                                                                                                                     |       |
| 23 |                               |     |                                                                                                                                                                                                                                                                                     |       |
| 24 |                               |     |                                                                                                                                                                                                                                                                                     |       |
| 25 |                               | 31b | Authorship eligibility guidelines and any intended use of professional writers                                                                                                                                                                                                      | 11    |
| 26 |                               |     |                                                                                                                                                                                                                                                                                     |       |
| 27 |                               | 31c | Plans, if any, for granting public access to the full protocol, participant-level dataset, and statistical code                                                                                                                                                                     | N/A   |
| 28 |                               |     |                                                                                                                                                                                                                                                                                     |       |
| 29 | <b>Appendices</b>             |     |                                                                                                                                                                                                                                                                                     |       |
| 30 |                               |     |                                                                                                                                                                                                                                                                                     |       |
| 31 | Informed consent materials    | 32  | Model consent form and other related documentation given to participants and authorised surrogates                                                                                                                                                                                  | N/A   |
| 32 |                               |     |                                                                                                                                                                                                                                                                                     |       |
| 33 |                               |     |                                                                                                                                                                                                                                                                                     |       |
| 34 | Biological specimens          | 33  | Plans for collection, laboratory evaluation, and storage of biological specimens for genetic or molecular analysis in the current trial and for future use in ancillary studies, if applicable                                                                                      | N/A   |
| 35 |                               |     |                                                                                                                                                                                                                                                                                     |       |
| 36 |                               |     |                                                                                                                                                                                                                                                                                     |       |

37 \*It is strongly recommended that this checklist be read in conjunction with the SPIRIT 2013 Explanation & Elaboration for important clarification on the items.  
 38 Amendments to the protocol should be tracked and dated. The SPIRIT checklist is copyrighted by the SPIRIT Group under the Creative Commons  
 39 "[Attribution-NonCommercial-NoDerivs 3.0 Unported](https://creativecommons.org/licenses/by-nc-nd/3.0/)" license.  
 40

# BMJ Open

## Xylitol for the prevention of acute otitis media episodes in children aged 2-4 years: Protocol for a pragmatic randomized controlled trial

|                                 |                                                                                                                                                                                                                                                                                                                                                                                                                                                                                                                                                                                                                                                                                                                                                                                                                                                                                                                                                                                                                                                                                                                                                                                                                                                                                                                                                                                                                                                             |
|---------------------------------|-------------------------------------------------------------------------------------------------------------------------------------------------------------------------------------------------------------------------------------------------------------------------------------------------------------------------------------------------------------------------------------------------------------------------------------------------------------------------------------------------------------------------------------------------------------------------------------------------------------------------------------------------------------------------------------------------------------------------------------------------------------------------------------------------------------------------------------------------------------------------------------------------------------------------------------------------------------------------------------------------------------------------------------------------------------------------------------------------------------------------------------------------------------------------------------------------------------------------------------------------------------------------------------------------------------------------------------------------------------------------------------------------------------------------------------------------------------|
| Journal:                        | <i>BMJ Open</i>                                                                                                                                                                                                                                                                                                                                                                                                                                                                                                                                                                                                                                                                                                                                                                                                                                                                                                                                                                                                                                                                                                                                                                                                                                                                                                                                                                                                                                             |
| Manuscript ID                   | bmjopen-2017-020941.R1                                                                                                                                                                                                                                                                                                                                                                                                                                                                                                                                                                                                                                                                                                                                                                                                                                                                                                                                                                                                                                                                                                                                                                                                                                                                                                                                                                                                                                      |
| Article Type:                   | Protocol                                                                                                                                                                                                                                                                                                                                                                                                                                                                                                                                                                                                                                                                                                                                                                                                                                                                                                                                                                                                                                                                                                                                                                                                                                                                                                                                                                                                                                                    |
| Date Submitted by the Author:   | 13-Mar-2018                                                                                                                                                                                                                                                                                                                                                                                                                                                                                                                                                                                                                                                                                                                                                                                                                                                                                                                                                                                                                                                                                                                                                                                                                                                                                                                                                                                                                                                 |
| Complete List of Authors:       | <p>Persaud, Nav; St. Michael's Hospital, Li Ka Shing Knowledge Institute<br/>         Laupacis, Andreas; St. Michael's Hospital, Li Ka Shing Knowledge Institute; University of Toronto, Department of Family and Community Medicine<br/>         Azarpazhooh, Amir; Faculty of Dentistry, University of Toronto<br/>         Birken, Catherine; University of Toronto<br/>         Hoch, Jeffrey; University of Davis, Center for Health Policy and Research<br/>         Isaranuwatthai, Wanrudee; St. Michael's Hospital, Li Ka Shing Knowledge Institute, Knowledge Translation<br/>         Maguire, Jonathan; Hospital for Sick Children, Department of Paediatrics<br/>         Mamdani, Muhammad; St. Michael's Hospital, Applied Health Research Centre, Li Ka Shing Knowledge Institute<br/>         Thorpe, Kevin; University of Toronto Dalla Lana School of Public Health<br/>         Allen, Christopher; Li Ka Shing Knowledge Institute, The Applied Health Research Centre<br/>         Mason, Dalah; Hospital for Sick Children, Child Health Evaluative Sciences<br/>         Kowal, Christine; Hospital for Sick Children, Child Health Evaluative Sciences<br/>         Bazeghi, Farnaz; St. Michael's Hospital, Li Ka Shing Knowledge Institute<br/>         Parkin, Patricia; The Hospital for Sick Children, Pediatric Medicine<br/>         TARGET Kids!, Collaboration; Hospital for Sick Children, ; St. Michael's Hospital,</p> |
| <b>Primary Subject Heading</b>: | General practice / Family practice                                                                                                                                                                                                                                                                                                                                                                                                                                                                                                                                                                                                                                                                                                                                                                                                                                                                                                                                                                                                                                                                                                                                                                                                                                                                                                                                                                                                                          |
| Secondary Subject Heading:      | Paediatrics                                                                                                                                                                                                                                                                                                                                                                                                                                                                                                                                                                                                                                                                                                                                                                                                                                                                                                                                                                                                                                                                                                                                                                                                                                                                                                                                                                                                                                                 |
| Keywords:                       | otitis media, upper respiratory tract infection, dental caries, xylitol, sorbitol                                                                                                                                                                                                                                                                                                                                                                                                                                                                                                                                                                                                                                                                                                                                                                                                                                                                                                                                                                                                                                                                                                                                                                                                                                                                                                                                                                           |
|                                 |                                                                                                                                                                                                                                                                                                                                                                                                                                                                                                                                                                                                                                                                                                                                                                                                                                                                                                                                                                                                                                                                                                                                                                                                                                                                                                                                                                                                                                                             |

SCHOLARONE™  
Manuscripts



Xylitol for the prevention of acute otitis media episodes in children aged 2-4 years: Protocol for a pragmatic randomized controlled trial

Nav Persaud,<sup>1, 2,3</sup> Andreas Laupacis,<sup>1, 2, 4</sup> Amir Azarpazhooh,<sup>5, 6,7, 8</sup> Catherine Birken,<sup>7,9,10,11,12,13</sup> Jeffrey S Hoch,<sup>2,4,7,14,15,16,17</sup> Wanrudee Isaranuwachai,<sup>7,18</sup> Jonathon L Maguire,<sup>9,10,19,20</sup> Muhammad Mamdani,<sup>2,4,7,16, 21,22</sup> Kevin Thorpe,<sup>2,23</sup> Christopher Allen,<sup>10</sup> Dalah Mason,<sup>13</sup> Christine Kowal,<sup>13</sup> Farnaz Bazeghi,<sup>2,13</sup> Patricia Parkin,<sup>7, 9,11,12,13</sup> and The TARGet Kids! Collaboration

### Author affiliations

1. Department of Family and Community Medicine, St Michael's Hospital, Toronto, Canada
2. Li Ka Shing Knowledge Institute, St Michael's Hospital, Toronto, Ontario, Canada
3. Department of Family and Community Medicine, University of Toronto, Toronto, Ontario, Canada
4. Institute for Clinical Evaluative Sciences (ICES), Toronto, Canada
5. Faculty of Dentistry, University of Toronto, Toronto, Canada.
6. Department of Dentistry, Mount Sinai Hospital, Toronto, Canada.
7. Institute of Health Policy, Management and Evaluation, University of Toronto, Toronto, Ontario Canada.
8. Toronto Health Economics and Technology Assessment Collaborative, University of Toronto, Toronto, Canada.
9. Department of Paediatrics, The Hospital for Sick Children (SickKids), University of Toronto, Canada
10. The Applied Health Research Centre of the Li Ka Shing Knowledge Institute, St Michael's Hospital, Toronto, Canada.
11. Pediatric Outcomes Research Team, Division of Pediatric Medicine, Department of Pediatrics, the Hospital for Sick Children, Toronto, Ontario, Canada
12. Department of Pediatrics, Faculty of Medicine, University of Toronto, Toronto, Ontario, Canada
13. Child Health Evaluative Sciences, SickKids Research Institute, Toronto, Ontario, Canada
14. Department of Public Health Sciences, School of Medicine, University of California, Davis, CA, United States
15. Center for Health Policy and Research, University of California, Davis, CA, United States.
16. Leslie Dan Faculty of Pharmacy, University of Toronto, Toronto, Canada
17. Department of Public Health Sciences, University of California, Davis, CA, United States
18. Centre for Excellence in Economic Analysis Research (CLEAR), St. Michael's Hospital, Toronto, ON, Canada.
19. Paediatric Outcomes Research Team, The Hospital for Sick Children (SickKids), University of Toronto, Canada
20. Department of Paediatrics, St Michael's Hospital, Toronto, Canada.
21. Department of Medicine, University of Toronto Faculty of Medicine, Toronto, Ontario, Canada
22. Centre for Healthcare Analytics Research and Training, St Michael's Hospital, Toronto, Canada
23. Dalla Lana School of Public Health, University of Toronto, Toronto, Ontario, Canada

Key words: otitis media, upper respiratory tract infection, dental caries, xylitol, sorbitol

Correspondence to Dr. Nav Persaud; [nav.persaud@utoronto.ca](mailto:nav.persaud@utoronto.ca).

Word count: 4596

## ABSTRACT

### Introduction

Xylitol (or “birch sugar”) is a naturally occurring sugar with antibacterial properties that has been used as a natural non-sugar sweetener in chewing gums, confectionery, toothpaste and medicines. In this preventative randomized trial, Xylitol will be tested for the prevention of acute otitis media (AOM), a common and costly condition in young children. The primary outcome will be the incidence of AOM. Secondary outcomes will include upper respiratory tract infections (URTIs) and dental caries.

### Methods and analysis

This study will be a pragmatic, blinded (participant and parents, practitioners and analyst), two-armed superiority; placebo randomized controlled trial (RCT) with 1:1 allocation, stratified by clinical site. The trial will be conducted in the eleven primary care group practices participating in the TARGet Kids! research network in Canada. Eligible participants between the ages of 2-4 years will be randomly assigned to the intervention arm of regular xylitol syrup use or the control arm of regular sorbitol use for 6 months. We expect to recruit 236 participants, per treatment arm, to detect a 20% relative risk reduction in AOM episodes. AOM will be identified through chart review. The secondary outcomes of URTIs and dental caries will be identified through monthly phone calls with specified questions.

### Ethics and dissemination

Ethics approval has been obtained from St. Michael's Hospital, and The Hospital for Sick Children for the sites participating in the TARGet Kids! research network. Results will be submitted for publication to a peer-reviewed journal and will be discussed with decision makers.

**Trial registration number:** NCT03055091 (clinicaltrials.gov)

### Strengths and limitations of this study

- This trial has the potential to determine whether a natural sweetener with antimicrobial properties prevents three common conditions during early childhood: otitis media, dental caries and upper respiratory tract infections
- The trial will be conducted through the TARGet Kids! primary care research network
- The six months of treatment and outcome assessment will allow the evaluation of the longer term effects of xylitol
- A challenge for trials with acute otitis media as an outcome is that parents may not distinguish AOM from other URTIs with similar symptoms and may not seek care; we will include both clinician-diagnosed AOM and parent-reported URTIs as separate outcomes.

## INTRODUCTION

Acute otitis media (AOM) is a common and costly condition in young children.<sup>1</sup> The annual global incidence of AOM is 700 million per year and 50% of those affected are children under the age of 5 years.<sup>2</sup> By age 3 years, 84% of children have had at least one episode of AOM and

1  
2  
3 46% have had 3 or more episodes.<sup>3</sup> Antibiotic treatment has only a modest effect on AOM  
4 duration<sup>4</sup> and does not prevent serious complications such as mastoiditis or meningitis which can  
5 rarely be fatal.<sup>5 6</sup> Most (>80%) children with AOM presenting for care have spontaneous  
6 symptom resolution within 3 days and the number needed to treat for antibiotic treatment to  
7 reduce symptom duration is 20 days, which must be balanced by a number needed to harm (with  
8 adverse effects of antibiotics such as diarrhea) of 14 days.<sup>4</sup> The incidence of mastoiditis has not  
9 changed over time despite changes in antibiotic prescribing.<sup>5 6 7</sup> Rare sequelae of AOM include  
10 delayed cognitive development, impaired communication skills and permanent hearing loss.<sup>3</sup>  
11 Parents of children with otitis media report missing 2-3 days of work per episode.<sup>1</sup>

12  
13  
14 Another common and costly infectious disease amongst North American pre-school aged  
15 children is upper respiratory tract infections (URTIs).<sup>8 9 10-12</sup> URTIs are the most common reason  
16 for emergency department visits and unscheduled outpatient visits in Canada, accounting for  
17 10% of emergency department visits for children under 10 years of age.<sup>13 14 15</sup> URTIs are also the  
18 most common reason for unscheduled visits to a care provider and Canadian children experience  
19 3-8 URTIs per year at a cost to the healthcare system of several hundred million dollars per year.  
20  
21

22 Nearly 30% of 2-5 year old children have dental caries.<sup>19</sup> Dental caries may lead to pain,  
23 difficulty eating and speaking, and can harm a child's self-esteem.<sup>20</sup> Treating dental caries in  
24 young children is challenging for practitioners, painful for the children and caries cost thousands  
25 of dollars to treat, with complicated caries requiring hospitalization costing several times more  
26 (and rarely resulting in death).<sup>21 22 23 24 25 26</sup>

27  
28 *In vitro* studies have shown that xylitol can reduce the attachment of bacteria that cause  
29 AOM, URTIs, and dental caries such as *Streptococcus Pneumoniae* and *Haemophilus Influenzae*  
30 to nasopharyngeal cells. AOM occurs when the upper airway is colonized with bacteria, viruses  
31 or a combination of both that travel from the nasopharynx to the middle ear by way of the  
32 Eustachian tube.<sup>27</sup> A Cochrane systematic review of the safety and efficacy of xylitol in  
33 preventing AOM in children up to 12 years of age found that there is fair evidence supporting the  
34 use of xylitol for the prevention of AOM (risk ratio, 0.75; 95% CI, 0.65 to 0.88 based on 3 RCTs  
35 from the same research group, studying 1826 children in total), but concluded that an adequately-  
36 powered, well designed trial is necessary.<sup>28</sup> Previous trials have not established whether regular  
37 xylitol syrup use is effective at preventing AOM in young children (<4 years) who are most  
38 likely to have AOM. Several RCTs of xylitol for the prevention of dental caries indicate that the  
39 antimicrobial effect of xylitol (which is posited to account for its efficacy in preventing AOM)  
40 increases with duration of use.<sup>29 30 31</sup> Therefore, the effect of the same dose of xylitol may be  
41 more effective at preventing AOM over the 6 month study period in the proposed study than it  
42 was in the previous trials that lasted 2 or 3 months.<sup>32</sup> The longer trials of xylitol for the  
43 prevention of dental caries also demonstrate that daily xylitol administration is safe, feasible and  
44 well tolerated for the 6 month study period in the proposed trial.<sup>29 30 31</sup> A pilot study of higher  
45 concentrations of xylitol syrup in young children found good compliance and tolerability.<sup>33</sup> In  
46 summary, regular xylitol syrup used for the 6 month study period is safe and feasible, and there  
47 is clinical equipoise over its effectiveness at preventing AOM in young children. There is no  
48 recommendation for or against the use of xylitol in the United States or in Canada. The paucity  
49 of high quality randomized controlled trials has been cited as a reason for the lack of consistent  
50 recommendations regarding the use of xylitol in young children.<sup>34</sup>

51  
52  
53  
54 The primary purpose of this study is to determine if regular use of xylitol syrup  
55 effectively prevents AOM in unselected 2-4 year old children. Such an intervention could  
56  
57  
58  
59  
60

1  
2  
3 increase the productivity of parents and caregivers, reduce serious complications and reduce the  
4 suffering of young children - each episode of AOM involves several excess hours of crying for  
5 two to seven days.<sup>35</sup> This trial could change clinical practice if the results are positive. In several  
6 other countries xylitol is recommended for the prevention of dental caries. For example, the  
7 *American Academy of Pediatric Dentists* recommends regular xylitol use for the prevention of  
8 dental caries based on the results of eight clinical trials.<sup>36</sup> However, a survey of American  
9 pediatricians found that few physicians (12%) recommend xylitol to patients and that most  
10 would either definitely (68%) or possibly (29%) recommend xylitol if there was additional  
11 evidence that it prevented AOM.<sup>37</sup>  
12  
13

## 14 AIMS AND OBJECTIVES

### 17 Primary Question

18 Does regular xylitol syrup use for 6 months reduce the number of physician-diagnosed AOM  
19 episodes in children aged 2-4 years?  
20  
21

### 22 Secondary Questions

- 23 (1) Does regular xylitol syrup use reduce the number of parent-reported upper respiratory tract  
24 infection (URTI) episodes in children aged 2-4 years?  
25 (2) Does regular xylitol syrup use reduce parent-reported dental caries in children aged 2-4  
26 years?  
27  
28  
29

## 30 METHODS AND ANALYSIS

### 32 Study Design

33 This will be a pragmatic, blinded (participant and parents, practitioners and analyst), two-armed  
34 superiority; placebo controlled randomized trial with 1:1 allocation, stratified by clinical site.  
35  
36

### 37 Setting

38 The trial will be conducted in the eleven primary care group practices currently participating in  
39 the TARGet Kids! research network ([www.targetkids.ca](http://www.targetkids.ca)) in Canada. There are no sites outside of  
40 Canada.  
41  
42

### 43 Eligibility Criteria

44 The patients in this study are healthy children aged 2-4 years who are participants of The  
45 Applied Research Group for Kids (TARGet Kids!), the largest pediatric primary care practice-  
46 based research network in Canada focused on child health ([www.targetkids.ca](http://www.targetkids.ca)).  
47  
48

49 **Inclusion criteria:** age 24-48 months at start of intervention, and parent or care provider able to  
50 give consent for participation including being able to understand the information provided in  
51 English. All children recruited to this study will also be participants in the TARGet Kids!  
52 research network.  
53

54 **Exclusion criteria:** craniofacial malformations, structural middle ear abnormalities, sibling or  
55 any other child living at the same address already enrolled in the trial (in order to prevent  
56  
57  
58  
59  
60

contamination), insertion of ventilation tubes prior to study period, current use of a xylitol product or reported xylitol sensitivity.

## Consent

Consent will be obtained by one of two methods:

1. For participants with an upcoming scheduled health visit: An invitation to participate will be mailed to participants along with the consent form two weeks prior to their scheduled health visit. At the visit a trained TARGet Kids! Research Assistant will review the eligibility criteria and the consent form with the parents/caregivers. Research Assistants will answer any questions in person.

2. For eligible TARGet Kids! participants without a scheduled visit: An invitation to participate will be mailed to participants along with the consent form. Parents/caregivers will have the opportunity to contact the Study Coordinator at any time (by email/phone) to answer questions. The consent form will be mailed back to the site.

Any participant that no longer wishes to participate in TARGet Kids! will not be approached.

## Intervention arm

Xylitol (or “birch sugar”) is a naturally occurring sugar with antibacterial properties that has been used as a natural non-sugar sweetener in chewing gums, confectionery, toothpaste and medicines.<sup>27 38 39</sup>

The investigational agents will be provided by XLEAR, a producer of commercial xylitol products that are sold in Canada. The product specifications used for this agent is that of their syrup or “tooth gel” products sold in 60 mL tubes. The product is approved by Health Canada as a food additive. The product has a shelf life of 2 years based on stability studies. Each tube is labeled with a best before date and a lot number on the tube crimp.

The experimental intervention is the provision of xylitol syrup (35% Xylitol concentration per weight) and instructions to ingest is 3-5 times per day. Each dose will be 5 mL of 350 g/L, therefore the maximum possible daily dose will be 9 g of xylitol per day. This is the daily dose that may be effective from previous trials.<sup>32</sup>

## Control Arm

The control intervention is the provision of sorbitol syrup (looks, smells and tastes like the xylitol syrup but is not an antimicrobial). Sorbitol is unlikely to have an effect on our primary outcome of AOM or the secondary outcomes of URTIs and dental caries; therefore it can be used as a placebo. The sorbitol syrup formulation is the same as the xylitol syrup except the concentration of sorbitol will be 30% by weight. The instructions for use are 3-5 times per day. Each dose will be 5 mL of 300 g/L of sorbitol; therefore the maximum daily dose will be 7.5 g of sorbitol.

XLEAR will produce the investigational agents through a dedicated production run and ship the products to the research pharmacy in a timely manner. This will allow preparation and shipment of the kits for each participant prior to the intervention period.

The data coordinating center will create master randomization tables and send these to the research pharmacy for dispensing. The study statistician will create the master randomization table using a computer-generated, site-stratified, block randomization design. The research pharmacy will use the randomization table for the dispensation of the investigational agents to each participant.

## Intervention period

The treatment period will be 6 months for all participants. The intervention will be given during the winter season.

The follow-up period is identical to the treatment period, and so will also be 6 months for all participants (see Figure 1).

Conducting the trial during winter months will maximize the efficiency of the trial because AOM and URTI incidences are highest during that time.<sup>40</sup> Since xylitol is not a treatment for infections, care will be provided as normal for any suspected infections.

## Premature Withdrawal/Discontinuation Criteria

Xylitol is sweet and children generally enjoy consuming it.<sup>33</sup> The number of missed doses in previous trials with frequent daily dosing was around 10%.

Parents will be called two weeks after they have been given the package to discuss any challenges with compliance, as well as during monthly follow-up calls.

Based on data from previous trials conducted in the TARGet Kids! research network and the fact that the primary outcome will be determined using a chart review, we anticipate a low (< 5%) rate of being lost to follow-up in this trial where follow-up does not require any special visits for research purposes only. If a participant leaves the primary care practice, we will attempt to obtain the name of the current care provider and obtain the chart for review. If a participant has left the primary care practice and we are unable to contact the parents or caregivers, we will treat the data as missing. Despite this, the sample size calculation assumes 10% of participants will not complete follow-up.

## Outcome Measures

### Primary outcome

The primary outcome of the total number of physician-diagnosed AOM episodes will be assessed by reviewing charts of the primary care provider and any other care providers reported by parents or caregiver at monthly phone calls.

Three methods for determining the diagnosis of AOM have been used in trials: clinical signs (bulging and red tympanic membrane), clinical signs with tympanometry, and clinical signs with tympanocentesis.<sup>41</sup> In this trial, the number of AOM episodes will be assessed using both objective clinical signs of AOM recorded in the chart and a physician's diagnosis of AOM. In order to make a diagnosis of AOM for this trial, the chart must contain *both* the documentation of signs of AOM (e.g. erythematous tympanic membrane) plus the practitioners' diagnosis that the patient had AOM. The addition of tympanometry to clinical signs does not necessarily improve the accuracy of AOM diagnosis.<sup>42</sup> Although tympanometry is recommended by some guidelines, it is not employed in routine clinical practice at any of the TARGet Kids! sites. Tympanocentesis is therapeutic and can prevent subsequent AOM episodes<sup>41</sup> so it cannot be used in this trial of AOM prevention (and it requires instruments not present in primary care sites). Four of the five previous trials of xylitol for the prevention of AOM employed clinical signs with tympanometry, and one used clinical signs to determine the number of AOM episodes.<sup>32</sup>

Previous RCTs of AOM *management* in young children have relied on the diagnoses made by primary care providers (who are generally the clinicians who diagnose AOM for clinical purposes).<sup>43 44</sup> The studies, involving longer study periods, used chart reviews to determine the number of AOM episodes just as we will in this trial (*Appendix 1*).<sup>44</sup>

1  
2  
3 We have conducted a chart review of 1,637 patients in the TARGet Kids! research network using  
4 a method similar to those in completed RCTs of AOM that involves reviewing charts for  
5 physical examination findings consistent with AOM and a diagnosis or assessment of AOM.<sup>45 43</sup>

6<sup>44</sup> In all of the episodes, the physical examination findings and the diagnosis were clearly  
7 documented in the chart (the term “AOM” was usually recorded in the assessment portion of the  
8 note), and there was perfect agreement between independent reviewers.

9  
10 In addition to reviews of the patient’s primary care provider medical record, the primary  
11 outcome will also include AOM episodes diagnosed by other care providers (e.g., at walk-in  
12 clinics or emergency rooms). Parental consent for release of this information will be obtained,  
13 and charts will be reviewed upon the end of follow-up period.

14 The primary analysis will be the total number of AOM episodes during the study period. We will  
15 also summarize the time to first AOM using survival curves.

16  
17 A limitation of employing physician-diagnosed episodes of AOM is that parents may not  
18 seek care when their child has AOM symptoms. This limitation is addressed with the secondary  
19 outcome of parent reported URTIs (*see secondary outcomes below*). Another limitation of  
20 physician-diagnosed AOM is that there is variability in the diagnosis of AOM by clinicians, with  
21 one study of administrative data indicating that some clinicians diagnose AOM twice as often as  
22 others.<sup>41 46 47</sup> Since the clinicians will be blinded to the allocated group, differences in clinical  
23 assessment will not bias the results. If there is a substantial number of incorrect physician  
24 diagnosed episodes of AOM (false positives), there results will be biased against the efficacy of  
25 xylitol.

26  
27 Note that our sample size calculation incorporates the incidence of AOM in the TARGet  
28 Kids! study population and so it takes into consideration the rate of AOM diagnosis by the same  
29 clinicians who will diagnose AOM in these study participants.

### 31 32 Secondary outcomes

33 The secondary outcome parent-reported URTI episodes will be assessed during monthly phone  
34 calls. A challenge in all trials that employ AOM as an outcome is the combined effect of two  
35 factors: (1) parents often decide not to seek care when a child has symptoms that may indicate  
36 AOM and (2) parents cannot distinguish between AOM and other URTIs because the symptoms  
37 are similar. We will address this challenge with our secondary outcome: parent-reported URTIs,  
38 a very common and costly (in aggregate) condition in early childhood.<sup>17 48</sup> The previous shorter  
39 (2 to 3 month) trials of xylitol found a non-significant trend towards fewer URTI episodes in  
40 children receiving xylitol.<sup>32</sup>

41  
42 A cohort study of children aged 2 months to 12 years receiving care at Toronto primary  
43 care sites found that medical consultation was sought in only 56% of episodes of URTI  
44 symptoms.<sup>49</sup> This is not surprising given that guidelines recommend against antibiotics for AOM  
45 and other URTIs in many cases. As many parents are aware of this recommendation from  
46 previous clinic visits, they may decide to treat children with analgesics and antipyretics without  
47 seeking care even if they believe the child has an AOM.<sup>50</sup> Thus, information about the total  
48 number of URTI episodes must be obtained directly from parents and caregivers as it will not be  
49 found in a patient’s medical record even if it includes records from all institutions and clinics.  
50 Parents may not diagnose AOM accurately based on symptoms because they overlap  
51 substantially with symptoms of URTIs.<sup>51</sup> Irritability and crying are the most common symptoms  
52 in AOM and URTI episodes.<sup>52</sup> Forty percent of children *with* AOM do *not* have an earache and  
53  
54  
55  
56  
57  
58  
59

1  
2  
3 31% do *not* have a fever,<sup>51</sup> while 72% of children *without* AOM exhibit symptoms of AOM  
4 (crying, fever or ear ache).<sup>52</sup>

5 Like previous studies, we will employ structured telephone interviews to assess the  
6 number of URTI episodes.<sup>53 54 55</sup> Parents or caregivers will be contacted every month and asked  
7 to report the number of URTIs the child has experienced since the last call (or since the  
8 beginning of the trial for the first call) using validated questions (*Appendix 1*).<sup>55</sup> We will employ  
9 the symptoms in the Canadian Acute Respiratory Illness and Flu (CARIF) scale that has been  
10 validated in this population.<sup>56</sup>

11 The secondary outcome, parent-reported dental caries, will also be assessed during the  
12 monthly phone calls. Parents or caregivers will be asked if they have been informed by a dentist  
13 or a physician that their child has or has had at least one or more dental caries (*Appendix 1*). This  
14 question has been used and validated in several epidemiological studies.<sup>57 58 59 60</sup> The dental  
15 caries secondary outcome will be binary (at least one versus none). Those with caries at baseline  
16 will be excluded from this analysis but included in all other analyses.

## 20 Other measures

21 Health economics measures will be collected for an economic evaluation. We will compare the  
22 cost and effect of the xylitol syrup against the control group using the net benefit regression  
23 framework from the perspective of the parents (who will be the payer for the syrup).<sup>61</sup> Costs will  
24 include costs incurred to the parents or caregivers such as their usual mode of transportation for  
25 attending medical appointments (collected during an extended phone call at the four month call).  
26 <sup>61</sup> The parent or caregiver hours of productivity (including employment) lost due to the child's  
27 AOM episodes (including, for example, the days the child could not attend daycare) will also be  
28 assessed during the monthly calls. The use of net benefit regression allows the economic  
29 evaluation to be conducted using regression methods (adjusting for potential confounders). The  
30 main outcome of the economic evaluation will be an incremental net benefit of xylitol syrup (in  
31 term of cost and number of physician-diagnosed AOM episodes) compared to control. In  
32 addition, we will estimate incremental cost-effectiveness ratios (e.g., an incremental cost per one  
33 physician-diagnosed AOM episode avoided and an incremental cost per one URTI episode  
34 avoided). Statistical uncertainty will be characterized using a 95% confidence interval and cost-  
35 effectiveness acceptability curves.<sup>62</sup>

36 Compliance (reported number of doses given per week) will be assessed during the  
37 monthly calls and by tallying the number of returned doses at the end of the study.

## 42 Sample size rationale

43 We used the results of three previous RCTs of xylitol for the prevention of AOM and data from  
44 participants in the TARGet Kids! research network to estimate the sample size.

45 In a chart review of TARGet Kids! research network participants, we found a comparable  
46 event rate as the control groups in the trials above: 670 episodes of AOM in 1637 patients (41%)  
47 over a three month period (0.14 AOM episodes per patient-month).

48 Since the data currently available suggest that the AOM rate is about 1.6 episodes per  
49 patient-year, we will somewhat conservatively assume a control event rate of 1.5. We will aim to  
50 detect a relative risk of 0.8 (i.e. relative risk reduction of 20%) with 80% power and alpha = 0.05  
51 (two-sided). A 20% RRR was chosen based on previous surveys of reasons physicians do not  
52 currently recommend xylitol and the RRR used in previous trials.<sup>32 37</sup> The sample size  
53 calculations assumed a Poisson distribution for the number of AOM episodes and were based on  
54  
55  
56  
57  
58  
59



1  
2  
3 the asymptotic distribution of the likelihood ratio test statistic. Calculations were performed in *R*  
4 (2.15.3) using the *asypow* package and power was confirmed via 10,000 simulations. The  
5 required sample size is 236 per group. (Note that while the number of participants is less than  
6 one of the previous trials<sup>63</sup>, the mean treatment and follow-up period in our study will be  
7 longer.) The above calculations take into consideration non-compliance and a loss to follow-up  
8 of 10% of participants only completing 50% of the follow-up period. These calculations assume  
9 there will be no substantial contamination. While xylitol preparations are commercially  
10 available, the dose of xylitol is less than one-tenth the dose found in trials to be effective at  
11 preventing AOM. A survey of TARGet Kids! participants showed that xylitol use is rare (< 5%).  
12 Siblings of those already enrolled in the trial will be excluded since contamination would be  
13 likely if two members of the family are enrolled and allocated to different arms.  
14

15  
16 We expect to recruit 40 participants per month. Thus sufficient patients will be recruited  
17 during two calendar years for the intervention to take place over two winter seasons. A previous  
18 RCT in the TARGet Kids! research network with similar inclusion criteria, exclusion criteria and  
19 recruitment strategy successfully recruited more than 66 children each month for two years when  
20 the network was smaller.<sup>64</sup> Parents of children who are participating in the TARGet Kids!  
21 research network's longitudinal study will be approached by research assistants regarding this  
22 RCT during routine primary care visits throughout the year. Randomization will take place just  
23 before the intervention begins so the small number of patients who are recruited but leave the  
24 practice before the intervention period will not be randomized.  
25

26 We will determine if xylitol is more effective in younger children (24-36 months old  
27 versus >36 months old at time of recruitment).  
28

## 29 30 **Statistical Analysis**

31 The primary analysis will be performed based on the intention to treat population. The primary  
32 outcome will be analyzed with a Poisson regression model. To account for participants who do  
33 not complete the entire planned follow-up and slight variations in the observation time for  
34 completers, the logarithm of follow-up time will be added as an offset term to the model. The  
35 treatment effect, expressed as a rate ratio (relative risk), and 95% confidence interval will be  
36 obtained from the model. A secondary analysis will adjust for characteristics with an imbalance  
37 between groups at baseline. Patient demographics will be summarized descriptively (e.g., means  
38 and SD or median and IQR for continuous variables and frequency and percentages for  
39 categorical). Although randomization guarantees balance in the long-run, there is a chance of  
40 imbalances in any sample. The demographics will be reviewed for clinically important  
41 imbalances that may be adjusted for in a secondary analysis. The secondary outcomes, number of  
42 URTI episodes and dental caries, will be analyzed similarly to the primary outcome.  
43  
44

## 45 46 **Safety Analysis**

47 A data safety monitoring board is not necessary because xylitol has been demonstrated to be safe  
48 in previous trials for the prevention of AOM and dental caries, and the maximum possible  
49 efficacy can be estimated from previous trials. We therefore do not anticipate any reason to stop  
50 the trial early.  
51

52 Xylitol can rarely cause osmotic diarrhea and abdominal discomfort. In previous trials,  
53 approximately 1% of children exposed to xylitol experienced diarrhea and slightly less than 1%  
54 of children exposed to control substances (e.g., sorbitol) experienced diarrhea (difference not  
55 statistically significant).<sup>45</sup> The vast majority of children, including 2-4 year olds, are able to  
56  
57  
58  
59

1  
2  
3 tolerate total daily doses of 45g of xylitol without significant gastrointestinal side effects.<sup>32 35</sup> The  
4 maximum total daily dose of xylitol in this trial will be 10g per day.

5  
6 In previous trials, a total of more than 1000 children were exposed to various  
7 formulations of xylitol or control substances and there were no reported episodes of choking or  
8 aspiration. The control intervention is the provision of sorbitol syrup which can cause diarrhea  
9 but at similar rates as xylitol.<sup>65</sup> Despite this, the consent form will alert parents to the potential  
10 of diarrhea.

### 11 12 **Adverse events**

13 All adverse events will be reported to the Hospital for Sick Children or St. Michael's Hospital  
14 Research Ethics Board according to their adverse event reporting requirements. All adverse drug  
15 reactions to the study medication will be reported to Health Canada within 15 calendar days or  
16 for death or life-threatening events, within 7 calendar days. In the latter case, a follow-up report  
17 must be filed within 8 calendar days. Serious adverse events and serious unexpected adverse  
18 events will be reported to the Natural and Non-prescription Health Products Directorate  
19 (NNHPD) in an expedited manner.

20  
21 To maintain the overall quality of the trial, unblinding will only be performed in  
22 exceptional circumstances when knowledge of the actual treatment is essential for management  
23 of the patient. If unblinding is deemed to be necessary by the investigator, the investigator will  
24 contact the coordinating center by telephone to ascertain the allocation group and communicate  
25 this to the participant's clinician and caregiver. The research staff will not be informed of the  
26 allocation group. Unblinding will not necessarily be a reason for discontinuation or exclusion  
27 from the analysis.  
28  
29  
30

### 31 **Management**

32 The Applied Health Research Centre (AHRC) will be responsible for trial data coordination,  
33 database development, data management and statistical analysis. Study data and patient surveys  
34 will be entered and maintained on a secure password protected database developed using  
35 REDCap® ([www.project-redcap.org](http://www.project-redcap.org)) and will be accessible via the internet for data entry  
36 purposes. Quality and completeness of data entry will be reviewed as soon as possible after data  
37 entry, within 5 business days of data entry for the first 5 participants randomized at each site, and  
38 within 15 days of data entry thereafter. Corrections or changes in REDCap® are tracked with  
39 the retention of the original data and the corrected data with the date of data entry and submitting  
40 personnel.  
41  
42  
43

### 44 **Patient and Public Involvement**

45 Patients were not directly involved in the development of the research question or the design of  
46 the study. A written summary of the study results will be sent to participants by email or by mail.  
47 The burden of the intervention on patients was not assessed prior to the start of the trial.  
48  
49

### 50 **Ethics and dissemination**

51 The *TARGet Kids!* research platform has been approved by the Research Ethics Board at the  
52 Hospital for Sick Children and St Michael's Hospital, as well as the other affiliated sites. Ethics  
53 approval for this study has been obtained for all participating sites. Results of the study will be  
54 submitted for publication to a peer-reviewed journal and will be discussed policy and decision  
55 makers.  
56  
57  
58  
59  
60

## SUMMARY

In summary, AOM, URTIs and dental caries are common and costly conditions in young children that might be prevented by regular xylitol use. Existing evidence indicates clinical equipoise on the efficacy of xylitol syrup in preventing AOM, URTIs and dental caries in preschool aged children. Evidence from previous long-term trials of xylitol for the prevention of dental caries has demonstrated that the intervention is well tolerated and feasible in this age group. The TARGet Kids! research network has a demonstrated record of conducting RCTs in young children and its existing research infrastructure will be mobilized to ensure that this trial will be completed efficiently and on schedule.

AOM and URTIs are commonly viewed as unavoidable during early childhood. This trial has the potential to transform the approach to these three common conditions.

### Author Contributions

The following authors contributed substantially to conception and the design of the protocol: NP, AL, AA, CB, JH, WI, JM, MM, KT, CA, DM, CK, FB, and PP.

The following authors drafted the manuscript: NP and FB.

The following authors revised the manuscript critically for important intellectual content: NP, AL, AA, CB, JH, WI, JM, MM, KT, CA, DM, CK, FB, and PP.

The following authors approved the final manuscript: NP, AL, AA, CB, JH, WI, JM, MM, KT, CA, DM, CK, FB, PP.

The following authors are accountable for all aspects of the work in ensuring that questions related to the accuracy or integrity of any part of the work are appropriately investigated and resolved: NP, AL, AA, CB, JH, WI, JM, MM, KT, CA, DM, CK, FB, and PP.

Members of the TARGet Kids! Collaboration contribute to data collection and provide general input on research directions.

### Funding

The study is funded by the Canadian Institutes of Health Research (CIHR). NP received salary support from a CIHR RCT training grant and from a PSI Graham Farquharson Knowledge Translation Fellowship. There was no role of the manufacturer in the concept, design, implementation, data collection and analysis and permission to publish. The products were purchased from the manufacturer using public research funding.

### Competing interests

There are no competing interests. PP reports receiving the following grants unrelated to this study: a grant from Hospital for Sick Children Foundation during the conduct of the study; a grant from Canadian Institutes of Health Research (FRN # 115059) for an ongoing investigator-initiated trial of iron deficiency in young children, for which Mead Johnson Nutrition provides non-financial support (Fer-In-Sol® liquid iron supplement). These agencies had no role in the design, collection, analyses or interpretation of the results of this study or in the preparation, review, or approval of the manuscript.

## REFERENCES

1. Dube E, De Wals P, Gilca V, et al. Burden of acute otitis media on Canadian families. *Can Fam Physician* 2011;57(1):60-5.
2. Monasta L, Ronfani L, Marchetti F, et al. Burden of disease caused by otitis media: systematic review and global estimates. *PLoS One* 2012;7(4):e36226. doi: 10.1371/journal.pone.0036226
3. Teele DW, Klein JO, Rosner B. Epidemiology of otitis media during the first seven years of life in children in greater Boston: a prospective, cohort study. *J Infect Dis* 1989;160(1):83-94.
4. Venekamp RP, Sanders S, Glasziou PP, et al. Antibiotics for acute otitis media in children. *Cochrane Database Syst Rev* 2013(1):CD000219. doi: 10.1002/14651858.CD000219.pub3
5. Anthonsen K, Hostmark K, Hansen S, et al. Acute mastoiditis in children: a 10-year retrospective and validated multicenter study. *Pediatr Infect Dis J* 2013;32(5):436-40. doi: 10.1097/INF.0b013e31828abd13
6. Palma S, Bovo R, Benatti A, et al. Mastoiditis in adults: a 19-year retrospective study. *Eur Arch Otorhinolaryngol* 2014;271(5):925-31. doi: 10.1007/s00405-013-2454-8
7. Kvaerner KJ, Austeng ME, Abdelnoor M. Hospitalization for acute otitis media as a useful marker for disease severity. *Pediatr Infect Dis J* 2013;32(9):946-9. doi: 10.1097/INF.0b013e318297c436
8. Heikkinen T, Jarvinen A. The common cold. *Lancet* 2003;361(9351):51-9. doi: 10.1016/S0140-6736(03)12162-9
9. Lambert SB, Allen KM, Druce JD, et al. Community epidemiology of human metapneumovirus, human coronavirus NL63, and other respiratory viruses in healthy preschool-aged children using parent-collected specimens. *Pediatrics* 2007;120(4):e929-37. doi: 10.1542/peds.2006-3703
10. Lambert SB, Allen KM, Carter RC, et al. The cost of community-managed viral respiratory illnesses in a cohort of healthy preschool-aged children. *Respir Res* 2008;9:11. doi: 10.1186/1465-9921-9-11
11. Kvaerner KJ, Nafstad P, Jaakkola JJ. Upper respiratory morbidity in preschool children: a cross-sectional study. *Arch Otolaryngol Head Neck Surg* 2000;126(10):1201-6.
12. Hendley JO. Epidemiology, pathogenesis, and treatment of the common cold. *Seminars in Pediatric Infectious Diseases* 1998;9(1):50-55. doi: 10.1016/S1045-1870(98)80051-4
13. Burt CW, McCaig LF, Rechtsteiner EA. Ambulatory medical care utilization estimates for 2005. *Adv Data* 2007(388):1-15.
14. Schanzer DL, Langley JM, Tam TW. Hospitalization attributable to influenza and other viral respiratory illnesses in Canadian children. *Pediatr Infect Dis J* 2006;25(9):795-800. doi: 10.1097/01.inf.0000232632.86800.8c
15. Canadian Institute of Health Information. National Ambulatory Care Reporting System. 2005
16. Public Health Agency of Canada. Economic Burden of Illness in Canada, 2005-2008, 2014.
17. Thomas E. Recent trends in upper respiratory infections, ear infections and asthma among young Canadian children *Health Reports* 2010;21(4)
18. Schanzer DL, Langley JM, Tam TW. Role of influenza and other respiratory viruses in admissions of adults to Canadian hospitals. *Influenza Other Respir Viruses* 2008;2(1):1-8. doi: 10.1111/j.1750-2659.2008.00035.x
19. National Center for Caries Disease Prevention and Health Promotion. Oral Health Resources - Children's Oral Health Overview. 2006
20. Nunn ME, Dietrich T, Singh HK, et al. Prevalence of early childhood caries among very young urban Boston children compared with US children. *J Public Health Dent* 2009;69(3):156-62. doi: 10.1111/j.1752-7325.2008.00116.x

21. Griffin SO, Gooch BF, Beltran E, et al. Dental services, costs, and factors associated with hospitalization for Medicaid-eligible children, Louisiana 1996-97. *J Public Health Dent* 2000;60(1):21-7.
22. Casamassimo PS, Thikkurissy S, Edelstein BL, et al. Beyond the dmft: the human and economic cost of early childhood caries. *J Am Dent Assoc* 2009;140(6):650-7.
23. Ettlbrick KL, Webb MD, Seale NS. Hospital charges for dental caries related emergency admissions. *Pediatr Dent* 2000;22(1):21-5.
24. Colak H, Dulgergil CT, Dalli M, et al. Early childhood caries update: A review of causes, diagnoses, and treatments. *J Nat Sci Biol Med* 2013;4(1):29-38. doi: 10.4103/0976-9668.107257
25. Association of Dental Surgeons of British Columbia. Children's dentistry task force report. 2001
26. Bertness JH, K. Promoting awareness, preventing pain: Facts on early childhood caries (ECC) (2nd ed.). *National Maternal and Child Oral Health Resource Center* 2004
27. Kontiokari T, Uhari M, Koskela M. Antiadhesive effects of xylitol on otopathogenic bacteria. *J Antimicrob Chemother* 1998;41(5):563-5.
28. Azarpazhooh A, Lawrence HP, Shah PS. Xylitol for preventing acute otitis media in children up to 12 years of age. *Cochrane Database Syst Rev* 2016(8):CD007095. doi: 10.1002/14651858.CD007095.pub3
29. Kandelman D, Gagnon G. A 24-month clinical study of the incidence and progression of dental caries in relation to consumption of chewing gum containing xylitol in school preventive programs. *J Dent Res* 1990;69(11):1771-5. doi: 10.1177/00220345900690111201
30. Mickenautsch S, Leal SC, Yengopal V, et al. Sugar-free chewing gum and dental caries: a systematic review. *J Appl Oral Sci* 2007;15(2):83-8.
31. Makinen KK, Jarvinen KL, Anttila CH, et al. Topical xylitol administration by parents for the promotion of oral health in infants: a caries prevention experiment at a Finnish Public Health Centre. *Int Dent J* 2013;63(4):210-24. doi: 10.1111/idj.12038
32. Azarpazhooh A, Limeback H, Lawrence HP, et al. Xylitol for preventing acute otitis media in children up to 12 years of age. *Cochrane Database Syst Rev* 2011(11):CD007095. doi: 10.1002/14651858.CD007095.pub2
33. Vernacchio L, Vezina RM, Mitchell AA. Tolerability of oral xylitol solution in young children: implications for otitis media prophylaxis. *Int J Pediatr Otorhinolaryngol* 2007;71(1):89-94. doi: 10.1016/j.ijporl.2006.09.008
34. Soderling E. Controversies around Xylitol. *Eur J Dent* 2009;3(2):81-2.
35. Tahtinen PA, Laine MK, Ruuskanen O, et al. Delayed versus immediate antimicrobial treatment for acute otitis media. *Pediatr Infect Dis J* 2012;31(12):1227-32. doi: 10.1097/INF.0b013e318266af2c
36. American Academy of Pediatric Dentistry. Guideline on Xylitol Use in Caries Prevention. 2011
37. Danhauer JL, Johnson CE, Rotan SN, et al. National survey of pediatricians' opinions about and practices for acute otitis media and xylitol use. *J Am Acad Audiol* 2010;21(5):329-46. doi: 10.3766/jaaa.21.5.5
38. Ly KA, Milgrom P, Rothen M. The potential of dental-protective chewing gum in oral health interventions. *J Am Dent Assoc* 2008;139(5):553-63.
39. Maguire A, Rugg-Gunn AJ. Xylitol and caries prevention--is it a magic bullet? *Br Dent J* 2003;194(8):429-36. doi: 10.1038/sj.bdj.4810022
40. Stockmann C, Ampofo K, Hersh AL, et al. Seasonality of acute otitis media and the role of respiratory viral activity in children. *Pediatr Infect Dis J* 2013;32(4):314-9. doi: 10.1097/INF.0b013e31827d104e
41. Pichichero ME, Casey JR. Comparison of study designs for acute otitis media trials. *Int J Pediatr Otorhinolaryngol* 2008;72(6):737-50. doi: 10.1016/j.ijporl.2008.02.020

42. Spiro DM, King WD, Arnold DH, et al. A randomized clinical trial to assess the effects of tympanometry on the diagnosis and treatment of acute otitis media. *Pediatrics* 2004;114(1):177-81.
43. Spurling GK, Del Mar CB, Dooley L, et al. Delayed antibiotics for respiratory infections. *Cochrane Database Syst Rev* 2013(4):CD004417. doi: 10.1002/14651858.CD004417.pub4
44. Little P, Gould C, Williamson I, et al. Pragmatic randomised controlled trial of two prescribing strategies for childhood acute otitis media. *BMJ* 2001;322(7282):336-42.
45. Uhari M, Kontiokari T, Koskela M, et al. Xylitol chewing gum in prevention of acute otitis media: double blind randomised trial. *BMJ* 1996;313(7066):1180-4.
46. Lyon JL, Ashton A, Turner B, et al. Variation in the diagnosis of upper respiratory tract infections and otitis media in an urgent medical care practice. *Arch Fam Med* 1998;7(3):249-54.
47. Pichichero ME. Acute otitis media: Part I. Improving diagnostic accuracy. *Am Fam Physician* 2000;61(7):2051-6.
48. Canadian Institute for Health Information. The cost of acute care hospital stays by medical condition in Canada: 2004-2005. Canada, 2008.
49. Saunders NR, Tennis O, Jacobson S, et al. Parents' responses to symptoms of respiratory tract infection in their children. *CMAJ* 2003;168(1):25-30.
50. McWilliams CJ, Goldman RD. Update on acute otitis media in children younger than 2 years of age. *Can Fam Physician* 2011;57(11):1283-5.
51. Heikkinen T, Ruuskanen O. Signs and symptoms predicting acute otitis media. *Arch Pediatr Adolesc Med* 1995;149(1):26-9.
52. Niemela M, Uhari M, Mottonen M, et al. Costs arising from otitis media. *Acta Paediatr* 1999;88(5):553-6.
53. Dales RE, Cakmak S, Brand K, et al. Respiratory illness in children attending daycare. *Pediatr Pulmonol* 2004;38(1):64-9. doi: 10.1002/ppul.20034
54. Quach C, Moore D, Ducharme F, et al. Do pediatric emergency departments pose a risk of infection? *BMC Pediatr* 2011;11:2. doi: 10.1186/1471-2431-11-2
55. Vissing NH, Jensen SM, Bisgaard H. Validity of information on atopic disease and other illness in young children reported by parents in a prospective birth cohort study. *BMC Med Res Methodol* 2012;12:160. doi: 10.1186/1471-2288-12-160
56. Jacobs B, Young NL, Dick PT, et al. Canadian Acute Respiratory Illness and Flu Scale (CARIFS): development of a valid measure for childhood respiratory infections. *J Clin Epidemiol* 2000;53(8):793-9.
57. Roberts CR, Warren JJ, Weber-Gasparoni K. Relationships between caregivers' responses to oral health screening questions and early childhood caries. *J Public Health Dent* 2009;69(4):290-3. doi: 10.1111/j.1752-7325.2009.00126.x
58. Sealy PA, Farrell N, Hoogenboom A. Caregiver self-report of children's use of the sippy cup among children 1 to 4 years of age. *J Pediatr Nurs* 2011;26(3):200-5. doi: 10.1016/j.pedn.2009.11.001
59. Nelson DE, Holtzman D, Bolen J, et al. Reliability and validity of measures from the Behavioral Risk Factor Surveillance System (BRFSS). *Soz Praventivmed* 2001;46 Suppl 1:S3-42.
60. Toronto Public Health. Toronto Perinatal and Child Health Survey 2003. 2005
61. Hoch JS, Briggs AH, Willan AR. Something old, something new, something borrowed, something blue: a framework for the marriage of health econometrics and cost-effectiveness analysis. *Health Econ* 2002;11(5):415-30. doi: 10.1002/hec.678
62. Hoch JS, Rockx MA, Krahn AD. Using the net benefit regression framework to construct cost-effectiveness acceptability curves: an example using data from a trial of external loop recorders versus Holter monitoring for ambulatory monitoring of "community acquired" syncope. *BMC Health Serv Res* 2006;6:68. doi: 10.1186/1472-6963-6-68

- 1  
2  
3 63. Hautalahti O, Renko M, Tapiainen T, et al. Failure of xylitol given three times a day for preventing  
4 acute otitis media. *Pediatr Infect Dis J* 2007;26(5):423-7. doi:  
5 10.1097/01.inf.0000259956.21859.dd  
6  
7 64. Maguire JL, Birken CS, Loeb MB, et al. DO IT Trial: vitamin D Outcomes and Interventions in Toddlers  
8 - a TARGet Kids! randomized controlled trial. *BMC Pediatr* 2014;14:37. doi: 10.1186/1471-2431-  
9 14-37  
10  
11 65. Vernacchio L, Corwin MJ, Vezina RM, et al. Xylitol syrup for the prevention of acute otitis media.  
12 *Pediatrics* 2014;133(2):289-95. doi: 10.1542/peds.2013-2373  
13  
14  
15

## 16 **Figure Legend**

17  
18 Figure 1. Timeline for intervention and follow-up.  
19  
20  
21  
22  
23  
24  
25  
26  
27  
28  
29  
30  
31  
32  
33  
34  
35  
36  
37  
38  
39  
40  
41  
42  
43  
44  
45  
46  
47  
48  
49  
50  
51  
52  
53  
54  
55  
56  
57  
58  
59  
60

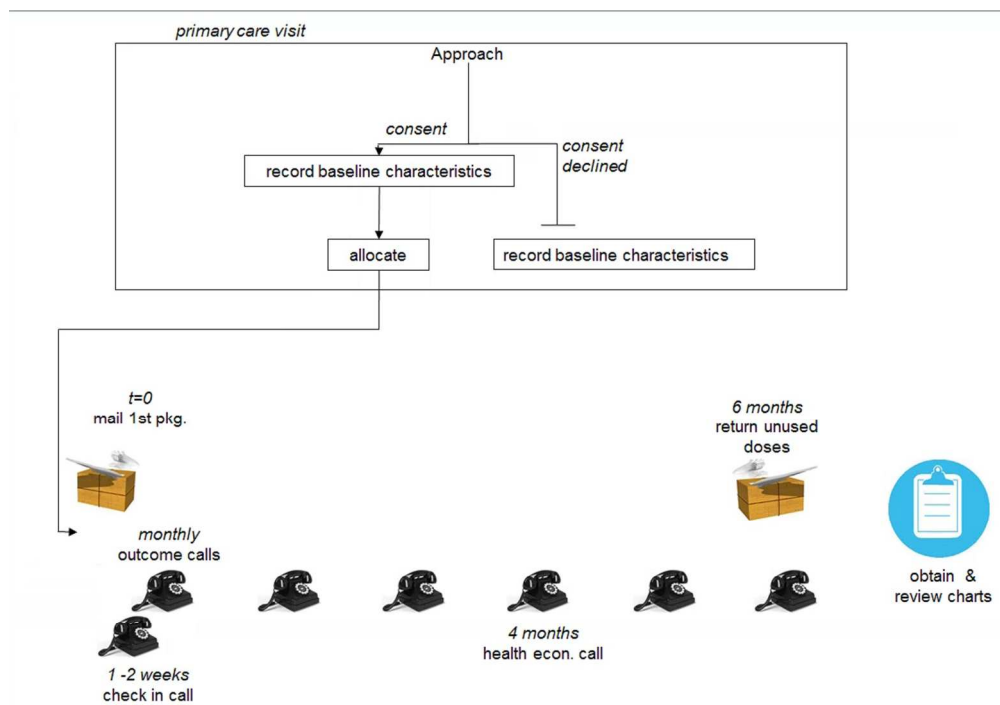

Figure 1. Timeline for intervention and follow up.

169x120mm (300 x 300 DPI)



## Appendix 1. Outcome determinations

### Primary outcome: number of episodes of physician diagnosed AOM

Information will be obtained from the chart review at the end of the study period.

(1) Does chart entry included diagnosis or assessment of “AOM” or “acute otitis media”? [Yes or No]

(2) Does a chart entry within 48 hours record physical examination findings of the tympanic membrane? [Yes or No]

*If, and only if, answers to both question are “Yes”, add one to total number of AOM episodes. Proceed to review the next chart entry until all chart entries during the study period have been reviewed.*

### Secondary outcome: number of parent reported URTIs

Information will be obtained via monthly telephone calls.

(1) Has the child had any of the symptoms for two consecutive days?

- stuffy nose or congestion or rhinorrhea
- cough
- sore throat
- wheeze
- shortness of breath

*If the child has had any of the above symptoms for two consecutive days, add one to the total number of parent reported URTI episodes.*

(2) Was the child well (symptom free) for two consecutive days during the illness?

*If the child was well for two consecutive days, add another one to the total number of parent reported URTI episodes (as this is a separate URTI) and repeat step (2) if needed.*

### Secondary outcome: parent reported dental caries (binary)

Information will be obtained via monthly telephone calls.

Have the parents or caregivers ever been told by a dentist or a physician that the child has or has had:

- dental caries
- multiple dental caries
- early childhood caries or ECC

1  
2  
3 *If the parents or caregivers have been told that the child has any of the above record the child as*  
4 *having dental caries (and in this case the parents and caregivers do not need to be asked about*  
5 *this on subsequent calls).*  
6

7  
8 Note that this outcome will also be assessed at baseline so that children with dental caries at  
9 baseline can be excluded from the dental caries analysis. This is because the outcome is binary  
10 (caries or not). Based on information available about children in the TARGet Kids! network, we  
11 expect 5-8 % of children to have caries at baseline and to be excluded from the dental caries  
12 analysis. Of course, all children will be included in the primary AOM analysis (and in the URTI  
13 analysis) regardless of whether they have had dental caries.  
14  
15  
16  
17  
18  
19  
20  
21  
22  
23  
24  
25  
26  
27  
28  
29  
30  
31  
32  
33  
34  
35  
36  
37  
38  
39  
40  
41  
42  
43  
44  
45  
46  
47  
48  
49  
50  
51  
52  
53  
54  
55  
56  
57  
58  
59  
60

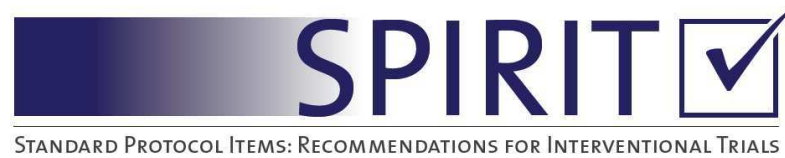

SPIRIT 2013 Checklist: Recommended items to address in a clinical trial protocol and related documents\*

| Section/item                      | Item No | Description                                                                                                                                                                                                                                                                              | Addressed on page number |
|-----------------------------------|---------|------------------------------------------------------------------------------------------------------------------------------------------------------------------------------------------------------------------------------------------------------------------------------------------|--------------------------|
| <b>Administrative information</b> |         |                                                                                                                                                                                                                                                                                          |                          |
| Title                             | 1       | Descriptive title identifying the study design, population, interventions, and, if applicable, trial acronym                                                                                                                                                                             | 1                        |
| Trial registration                | 2a      | Trial identifier and registry name. If not yet registered, name of intended registry                                                                                                                                                                                                     | 2                        |
|                                   | 2b      | All items from the World Health Organization Trial Registration Data Set                                                                                                                                                                                                                 | N/A                      |
| Protocol version                  | 3       | Date and version identifier                                                                                                                                                                                                                                                              | N/A                      |
| Funding                           | 4       | Sources and types of financial, material, and other support                                                                                                                                                                                                                              | 11                       |
| Roles and responsibilities        | 5a      | Names, affiliations, and roles of protocol contributors                                                                                                                                                                                                                                  | 1                        |
|                                   | 5b      | Name and contact information for the trial sponsor                                                                                                                                                                                                                                       | 1                        |
|                                   | 5c      | Role of study sponsor and funders, if any, in study design; collection, management, analysis, and interpretation of data; writing of the report; and the decision to submit the report for publication, including whether they will have ultimate authority over any of these activities | 12                       |
|                                   | 5d      | Composition, roles, and responsibilities of the coordinating centre, steering committee, endpoint adjudication committee, data management team, and other individuals or groups overseeing the trial, if applicable (see Item 21a for data monitoring committee)                         | 5,10                     |

## Introduction

|                          |    |                                                                                                                                                                                                           |     |
|--------------------------|----|-----------------------------------------------------------------------------------------------------------------------------------------------------------------------------------------------------------|-----|
| Background and rationale | 6a | Description of research question and justification for undertaking the trial, including summary of relevant studies (published and unpublished) examining benefits and harms for each intervention        | 2-4 |
|                          | 6b | Explanation for choice of comparators                                                                                                                                                                     | 2-4 |
| Objectives               | 7  | Specific objectives or hypotheses                                                                                                                                                                         | 4   |
| Trial design             | 8  | Description of trial design including type of trial (eg, parallel group, crossover, factorial, single group), allocation ratio, and framework (eg, superiority, equivalence, noninferiority, exploratory) | 4   |

## Methods: Participants, interventions, and outcomes

|                      |     |                                                                                                                                                                                                                                                                                                                                                                                |      |
|----------------------|-----|--------------------------------------------------------------------------------------------------------------------------------------------------------------------------------------------------------------------------------------------------------------------------------------------------------------------------------------------------------------------------------|------|
| Study setting        | 9   | Description of study settings (eg, community clinic, academic hospital) and list of countries where data will be collected. Reference to where list of study sites can be obtained                                                                                                                                                                                             | 4    |
| Eligibility criteria | 10  | Inclusion and exclusion criteria for participants. If applicable, eligibility criteria for study centres and individuals who will perform the interventions (eg, surgeons, psychotherapists)                                                                                                                                                                                   | 4-5  |
| Interventions        | 11a | Interventions for each group with sufficient detail to allow replication, including how and when they will be administered                                                                                                                                                                                                                                                     | 5-6  |
|                      | 11b | Criteria for discontinuing or modifying allocated interventions for a given trial participant (eg, drug dose change in response to harms, participant request, or improving/worsening disease)                                                                                                                                                                                 | 6    |
|                      | 11c | Strategies to improve adherence to intervention protocols, and any procedures for monitoring adherence (eg, drug tablet return, laboratory tests)                                                                                                                                                                                                                              | 5-6  |
|                      | 11d | Relevant concomitant care and interventions that are permitted or prohibited during the trial                                                                                                                                                                                                                                                                                  | 5,10 |
| Outcomes             | 12  | Primary, secondary, and other outcomes, including the specific measurement variable (eg, systolic blood pressure), analysis metric (eg, change from baseline, final value, time to event), method of aggregation (eg, median, proportion), and time point for each outcome. Explanation of the clinical relevance of chosen efficacy and harm outcomes is strongly recommended | 6-8  |
| Participant timeline | 13  | Time schedule of enrolment, interventions (including any run-ins and washouts), assessments, and visits for participants. A schematic diagram is highly recommended (see Figure)                                                                                                                                                                                               | 5-6  |

1  
2  
3  
4  
5  
6  
7  
8  
9  
10  
11  
12  
13  
14  
15  
16  
17  
18  
19  
20  
21  
22  
23  
24  
25  
26  
27  
28  
29  
30  
31  
32  
33  
34  
35  
36  
37  
38  
39  
40  
41  
42  
43  
44  
45  
46  
47

|             |    |                                                                                                                                                                                       |      |
|-------------|----|---------------------------------------------------------------------------------------------------------------------------------------------------------------------------------------|------|
| Sample size | 14 | Estimated number of participants needed to achieve study objectives and how it was determined, including clinical and statistical assumptions supporting any sample size calculations | 8-9  |
| Recruitment | 15 | Strategies for achieving adequate participant enrolment to reach target sample size                                                                                                   | 2,9, |

**Methods: Assignment of interventions (for controlled trials)**

Allocation:

|                                  |     |                                                                                                                                                                                                                                                                                                                                                          |             |
|----------------------------------|-----|----------------------------------------------------------------------------------------------------------------------------------------------------------------------------------------------------------------------------------------------------------------------------------------------------------------------------------------------------------|-------------|
| Sequence generation              | 16a | Method of generating the allocation sequence (eg, computer-generated random numbers), and list of any factors for stratification. To reduce predictability of a random sequence, details of any planned restriction (eg, blocking) should be provided in a separate document that is unavailable to those who enrol participants or assign interventions | 4-5,9       |
| Allocation concealment mechanism | 16b | Mechanism of implementing the allocation sequence (eg, central telephone; sequentially numbered, opaque, sealed envelopes), describing any steps to conceal the sequence until interventions are assigned                                                                                                                                                | 2, 5, 9, 10 |
| Implementation                   | 16c | Who will generate the allocation sequence, who will enrol participants, and who will assign participants to interventions                                                                                                                                                                                                                                | 5           |
| Blinding (masking)               | 17a | Who will be blinded after assignment to interventions (eg, trial participants, care providers, outcome assessors, data analysts), and how                                                                                                                                                                                                                | 4           |
|                                  | 17b | If blinded, circumstances under which unblinding is permissible, and procedure for revealing a participant's allocated intervention during the trial                                                                                                                                                                                                     | 10          |

**Methods: Data collection, management, and analysis**

|                         |     |                                                                                                                                                                                                                                                                                                                                                                                                              |     |
|-------------------------|-----|--------------------------------------------------------------------------------------------------------------------------------------------------------------------------------------------------------------------------------------------------------------------------------------------------------------------------------------------------------------------------------------------------------------|-----|
| Data collection methods | 18a | Plans for assessment and collection of outcome, baseline, and other trial data, including any related processes to promote data quality (eg, duplicate measurements, training of assessors) and a description of study instruments (eg, questionnaires, laboratory tests) along with their reliability and validity, if known. Reference to where data collection forms can be found, if not in the protocol | 6-8 |
|                         | 18b | Plans to promote participant retention and complete follow-up, including list of any outcome data to be collected for participants who discontinue or deviate from intervention protocols                                                                                                                                                                                                                    | 6-8 |

|    |                                 |     |                                                                                                                                                                                                                                                                                                                                       |       |
|----|---------------------------------|-----|---------------------------------------------------------------------------------------------------------------------------------------------------------------------------------------------------------------------------------------------------------------------------------------------------------------------------------------|-------|
| 1  |                                 |     |                                                                                                                                                                                                                                                                                                                                       |       |
| 2  |                                 |     |                                                                                                                                                                                                                                                                                                                                       |       |
| 3  | Data management                 | 19  | Plans for data entry, coding, security, and storage, including any related processes to promote data quality (eg, double data entry; range checks for data values). Reference to where details of data management procedures can be found, if not in the protocol                                                                     | 10    |
| 4  |                                 |     |                                                                                                                                                                                                                                                                                                                                       |       |
| 5  |                                 |     |                                                                                                                                                                                                                                                                                                                                       |       |
| 6  |                                 |     |                                                                                                                                                                                                                                                                                                                                       |       |
| 7  | Statistical methods             | 20a | Statistical methods for analysing primary and secondary outcomes. Reference to where other details of the statistical analysis plan can be found, if not in the protocol                                                                                                                                                              | 9     |
| 8  |                                 |     |                                                                                                                                                                                                                                                                                                                                       |       |
| 9  |                                 |     |                                                                                                                                                                                                                                                                                                                                       |       |
| 10 |                                 | 20b | Methods for any additional analyses (eg, subgroup and adjusted analyses)                                                                                                                                                                                                                                                              | 9     |
| 11 |                                 |     |                                                                                                                                                                                                                                                                                                                                       |       |
| 12 |                                 | 20c | Definition of analysis population relating to protocol non-adherence (eg, as randomised analysis), and any statistical methods to handle missing data (eg, multiple imputation)                                                                                                                                                       | 9     |
| 13 |                                 |     |                                                                                                                                                                                                                                                                                                                                       |       |
| 14 |                                 |     |                                                                                                                                                                                                                                                                                                                                       |       |
| 15 | <b>Methods: Monitoring</b>      |     |                                                                                                                                                                                                                                                                                                                                       |       |
| 16 |                                 |     |                                                                                                                                                                                                                                                                                                                                       |       |
| 17 | Data monitoring                 | 21a | Composition of data monitoring committee (DMC); summary of its role and reporting structure; statement of whether it is independent from the sponsor and competing interests; and reference to where further details about its charter can be found, if not in the protocol. Alternatively, an explanation of why a DMC is not needed | N/A   |
| 18 |                                 |     |                                                                                                                                                                                                                                                                                                                                       |       |
| 19 |                                 |     |                                                                                                                                                                                                                                                                                                                                       |       |
| 20 |                                 |     |                                                                                                                                                                                                                                                                                                                                       |       |
| 21 |                                 |     |                                                                                                                                                                                                                                                                                                                                       |       |
| 22 |                                 | 21b | Description of any interim analyses and stopping guidelines, including who will have access to these interim results and make the final decision to terminate the trial                                                                                                                                                               | 10    |
| 23 |                                 |     |                                                                                                                                                                                                                                                                                                                                       |       |
| 24 |                                 |     |                                                                                                                                                                                                                                                                                                                                       |       |
| 25 | Harms                           | 22  | Plans for collecting, assessing, reporting, and managing solicited and spontaneously reported adverse events and other unintended effects of trial interventions or trial conduct                                                                                                                                                     | 10    |
| 26 |                                 |     |                                                                                                                                                                                                                                                                                                                                       |       |
| 27 |                                 |     |                                                                                                                                                                                                                                                                                                                                       |       |
| 28 | Auditing                        | 23  | Frequency and procedures for auditing trial conduct, if any, and whether the process will be independent from investigators and the sponsor                                                                                                                                                                                           | N/A   |
| 29 |                                 |     |                                                                                                                                                                                                                                                                                                                                       |       |
| 30 |                                 |     |                                                                                                                                                                                                                                                                                                                                       |       |
| 31 |                                 |     |                                                                                                                                                                                                                                                                                                                                       |       |
| 32 | <b>Ethics and dissemination</b> |     |                                                                                                                                                                                                                                                                                                                                       |       |
| 33 |                                 |     |                                                                                                                                                                                                                                                                                                                                       |       |
| 34 | Research ethics approval        | 24  | Plans for seeking research ethics committee/institutional review board (REC/IRB) approval                                                                                                                                                                                                                                             | 10-11 |
| 35 |                                 |     |                                                                                                                                                                                                                                                                                                                                       |       |
| 36 |                                 |     |                                                                                                                                                                                                                                                                                                                                       |       |
| 37 | Protocol amendments             | 25  | Plans for communicating important protocol modifications (eg, changes to eligibility criteria, outcomes, analyses) to relevant parties (eg, investigators, REC/IRBs, trial participants, trial registries, journals, regulators)                                                                                                      | 10-11 |
| 38 |                                 |     |                                                                                                                                                                                                                                                                                                                                       |       |
| 39 |                                 |     |                                                                                                                                                                                                                                                                                                                                       |       |
| 40 |                                 |     |                                                                                                                                                                                                                                                                                                                                       |       |
| 41 |                                 |     |                                                                                                                                                                                                                                                                                                                                       |       |
| 42 |                                 |     |                                                                                                                                                                                                                                                                                                                                       |       |
| 43 |                                 |     |                                                                                                                                                                                                                                                                                                                                       |       |
| 44 |                                 |     |                                                                                                                                                                                                                                                                                                                                       |       |
| 45 |                                 |     |                                                                                                                                                                                                                                                                                                                                       |       |
| 46 |                                 |     |                                                                                                                                                                                                                                                                                                                                       |       |
| 47 |                                 |     |                                                                                                                                                                                                                                                                                                                                       |       |



|    |                               |     |                                                                                                                                                                                                                                                                                     |       |
|----|-------------------------------|-----|-------------------------------------------------------------------------------------------------------------------------------------------------------------------------------------------------------------------------------------------------------------------------------------|-------|
| 1  |                               |     |                                                                                                                                                                                                                                                                                     |       |
| 2  |                               |     |                                                                                                                                                                                                                                                                                     |       |
| 3  | Consent or assent             | 26a | Who will obtain informed consent or assent from potential trial participants or authorised surrogates, and how (see Item 32)                                                                                                                                                        | 9     |
| 4  |                               |     |                                                                                                                                                                                                                                                                                     |       |
| 5  |                               |     |                                                                                                                                                                                                                                                                                     |       |
| 6  |                               | 26b | Additional consent provisions for collection and use of participant data and biological specimens in ancillary studies, if applicable                                                                                                                                               | N/A   |
| 7  |                               |     |                                                                                                                                                                                                                                                                                     |       |
| 8  |                               |     |                                                                                                                                                                                                                                                                                     |       |
| 9  | Confidentiality               | 27  | How personal information about potential and enrolled participants will be collected, shared, and maintained in order to protect confidentiality before, during, and after the trial                                                                                                | 6,10  |
| 10 |                               |     |                                                                                                                                                                                                                                                                                     |       |
| 11 |                               |     |                                                                                                                                                                                                                                                                                     |       |
| 12 | Declaration of interests      | 28  | Financial and other competing interests for principal investigators for the overall trial and each study site                                                                                                                                                                       | 11    |
| 13 |                               |     |                                                                                                                                                                                                                                                                                     |       |
| 14 |                               |     |                                                                                                                                                                                                                                                                                     |       |
| 15 | Access to data                | 29  | Statement of who will have access to the final trial dataset, and disclosure of contractual agreements that limit such access for investigators                                                                                                                                     | 10,11 |
| 16 |                               |     |                                                                                                                                                                                                                                                                                     |       |
| 17 |                               |     |                                                                                                                                                                                                                                                                                     |       |
| 18 | Ancillary and post-trial care | 30  | Provisions, if any, for ancillary and post-trial care, and for compensation to those who suffer harm from trial participation                                                                                                                                                       | N/A   |
| 19 |                               |     |                                                                                                                                                                                                                                                                                     |       |
| 20 |                               |     |                                                                                                                                                                                                                                                                                     |       |
| 21 | Dissemination policy          | 31a | Plans for investigators and sponsor to communicate trial results to participants, healthcare professionals, the public, and other relevant groups (eg, via publication, reporting in results databases, or other data sharing arrangements), including any publication restrictions | 11    |
| 22 |                               |     |                                                                                                                                                                                                                                                                                     |       |
| 23 |                               |     |                                                                                                                                                                                                                                                                                     |       |
| 24 |                               |     |                                                                                                                                                                                                                                                                                     |       |
| 25 |                               | 31b | Authorship eligibility guidelines and any intended use of professional writers                                                                                                                                                                                                      | 11    |
| 26 |                               |     |                                                                                                                                                                                                                                                                                     |       |
| 27 |                               | 31c | Plans, if any, for granting public access to the full protocol, participant-level dataset, and statistical code                                                                                                                                                                     | N/A   |
| 28 |                               |     |                                                                                                                                                                                                                                                                                     |       |
| 29 | <b>Appendices</b>             |     |                                                                                                                                                                                                                                                                                     |       |
| 30 |                               |     |                                                                                                                                                                                                                                                                                     |       |
| 31 | Informed consent materials    | 32  | Model consent form and other related documentation given to participants and authorised surrogates                                                                                                                                                                                  | N/A   |
| 32 |                               |     |                                                                                                                                                                                                                                                                                     |       |
| 33 |                               |     |                                                                                                                                                                                                                                                                                     |       |
| 34 | Biological specimens          | 33  | Plans for collection, laboratory evaluation, and storage of biological specimens for genetic or molecular analysis in the current trial and for future use in ancillary studies, if applicable                                                                                      | N/A   |
| 35 |                               |     |                                                                                                                                                                                                                                                                                     |       |
| 36 |                               |     |                                                                                                                                                                                                                                                                                     |       |

37 \*It is strongly recommended that this checklist be read in conjunction with the SPIRIT 2013 Explanation & Elaboration for important clarification on the items.  
 38 Amendments to the protocol should be tracked and dated. The SPIRIT checklist is copyrighted by the SPIRIT Group under the Creative Commons  
 39 "[Attribution-NonCommercial-NoDerivs 3.0 Unported](https://creativecommons.org/licenses/by-nc-nd/3.0/)" license.  
 40

# BMJ Open

## Xylitol for the prevention of acute otitis media episodes in children aged 2-4 years: Protocol for a pragmatic randomized controlled trial

|                                 |                                                                                                                                                                                                                                                                                                                                                                                                                                                                                                                                                                                                                                                                                                                                                                                                                                                                                                                                                                                                                                                                                                                                                                                                                                                                                                                                                                                                                                                             |
|---------------------------------|-------------------------------------------------------------------------------------------------------------------------------------------------------------------------------------------------------------------------------------------------------------------------------------------------------------------------------------------------------------------------------------------------------------------------------------------------------------------------------------------------------------------------------------------------------------------------------------------------------------------------------------------------------------------------------------------------------------------------------------------------------------------------------------------------------------------------------------------------------------------------------------------------------------------------------------------------------------------------------------------------------------------------------------------------------------------------------------------------------------------------------------------------------------------------------------------------------------------------------------------------------------------------------------------------------------------------------------------------------------------------------------------------------------------------------------------------------------|
| Journal:                        | <i>BMJ Open</i>                                                                                                                                                                                                                                                                                                                                                                                                                                                                                                                                                                                                                                                                                                                                                                                                                                                                                                                                                                                                                                                                                                                                                                                                                                                                                                                                                                                                                                             |
| Manuscript ID                   | bmjopen-2017-020941.R2                                                                                                                                                                                                                                                                                                                                                                                                                                                                                                                                                                                                                                                                                                                                                                                                                                                                                                                                                                                                                                                                                                                                                                                                                                                                                                                                                                                                                                      |
| Article Type:                   | Protocol                                                                                                                                                                                                                                                                                                                                                                                                                                                                                                                                                                                                                                                                                                                                                                                                                                                                                                                                                                                                                                                                                                                                                                                                                                                                                                                                                                                                                                                    |
| Date Submitted by the Author:   | 20-Apr-2018                                                                                                                                                                                                                                                                                                                                                                                                                                                                                                                                                                                                                                                                                                                                                                                                                                                                                                                                                                                                                                                                                                                                                                                                                                                                                                                                                                                                                                                 |
| Complete List of Authors:       | <p>Persaud, Nav; St. Michael's Hospital, Li Ka Shing Knowledge Institute<br/>         Laupacis, Andreas; St. Michael's Hospital, Li Ka Shing Knowledge Institute; University of Toronto, Department of Family and Community Medicine<br/>         Azarpazhooh, Amir; Faculty of Dentistry, University of Toronto<br/>         Birken, Catherine; University of Toronto<br/>         Hoch, Jeffrey; University of Davis, Center for Health Policy and Research<br/>         Isaranuwatthai, Wanrudee; St. Michael's Hospital, Li Ka Shing Knowledge Institute, Knowledge Translation<br/>         Maguire, Jonathan; Hospital for Sick Children, Department of Paediatrics<br/>         Mamdani, Muhammad; St. Michael's Hospital, Applied Health Research Centre, Li Ka Shing Knowledge Institute<br/>         Thorpe, Kevin; University of Toronto Dalla Lana School of Public Health<br/>         Allen, Christopher; Li Ka Shing Knowledge Institute, The Applied Health Research Centre<br/>         Mason, Dalah; Hospital for Sick Children, Child Health Evaluative Sciences<br/>         Kowal, Christine; Hospital for Sick Children, Child Health Evaluative Sciences<br/>         Bazeghi, Farnaz; St. Michael's Hospital, Li Ka Shing Knowledge Institute<br/>         Parkin, Patricia; The Hospital for Sick Children, Pediatric Medicine<br/>         TARGet Kids!, Collaboration; Hospital for Sick Children, ; St. Michael's Hospital,</p> |
| <b>Primary Subject Heading</b>: | General practice / Family practice                                                                                                                                                                                                                                                                                                                                                                                                                                                                                                                                                                                                                                                                                                                                                                                                                                                                                                                                                                                                                                                                                                                                                                                                                                                                                                                                                                                                                          |
| Secondary Subject Heading:      | Paediatrics                                                                                                                                                                                                                                                                                                                                                                                                                                                                                                                                                                                                                                                                                                                                                                                                                                                                                                                                                                                                                                                                                                                                                                                                                                                                                                                                                                                                                                                 |
| Keywords:                       | otitis media, upper respiratory tract infection, dental caries, xylitol, sorbitol                                                                                                                                                                                                                                                                                                                                                                                                                                                                                                                                                                                                                                                                                                                                                                                                                                                                                                                                                                                                                                                                                                                                                                                                                                                                                                                                                                           |
|                                 |                                                                                                                                                                                                                                                                                                                                                                                                                                                                                                                                                                                                                                                                                                                                                                                                                                                                                                                                                                                                                                                                                                                                                                                                                                                                                                                                                                                                                                                             |

SCHOLARONE™  
Manuscripts



Xylitol for the prevention of acute otitis media episodes in children aged 2-4 years: Protocol for a pragmatic randomized controlled trial

Nav Persaud,<sup>1, 2,3</sup> Andreas Laupacis,<sup>1, 2, 4</sup> Amir Azarpazhooh,<sup>5, 6,7, 8</sup> Catherine Birken,<sup>7,9,10,11,12,13</sup> Jeffrey S Hoch,<sup>2,4,7,14,15,16,17</sup> Wanrudee Isaranuwachai,<sup>7,18</sup> Jonathon L Maguire,<sup>9,10,19,20</sup> Muhammad Mamdani,<sup>2,4,7,16, 21,22</sup> Kevin Thorpe,<sup>2,23</sup> Christopher Allen,<sup>10</sup> Dalah Mason,<sup>13</sup> Christine Kowal,<sup>13</sup> Farnaz Bazeghi,<sup>2,13</sup> Patricia Parkin,<sup>7, 9,11,12,13</sup> and The TARGet Kids! Collaboration

### Author affiliations

1. Department of Family and Community Medicine, St Michael's Hospital, Toronto, Canada
2. Li Ka Shing Knowledge Institute, St Michael's Hospital, Toronto, Ontario, Canada
3. Department of Family and Community Medicine, University of Toronto, Toronto, Ontario, Canada
4. Institute for Clinical Evaluative Sciences (ICES), Toronto, Canada
5. Faculty of Dentistry, University of Toronto, Toronto, Canada.
6. Department of Dentistry, Mount Sinai Hospital, Toronto, Canada.
7. Institute of Health Policy, Management and Evaluation, University of Toronto, Toronto, Ontario Canada.
8. Toronto Health Economics and Technology Assessment Collaborative, University of Toronto, Toronto, Canada.
9. Department of Paediatrics, The Hospital for Sick Children (SickKids), University of Toronto, Canada
10. The Applied Health Research Centre of the Li Ka Shing Knowledge Institute, St Michael's Hospital, Toronto, Canada.
11. Pediatric Outcomes Research Team, Division of Pediatric Medicine, Department of Pediatrics, the Hospital for Sick Children, Toronto, Ontario, Canada
12. Department of Pediatrics, Faculty of Medicine, University of Toronto, Toronto, Ontario, Canada
13. Child Health Evaluative Sciences, SickKids Research Institute, Toronto, Ontario, Canada
14. Department of Public Health Sciences, School of Medicine, University of California, Davis, CA, United States
15. Center for Health Policy and Research, University of California, Davis, CA, United States.
16. Leslie Dan Faculty of Pharmacy, University of Toronto, Toronto, Canada
17. Department of Public Health Sciences, University of California, Davis, CA, United States
18. Centre for Excellence in Economic Analysis Research (CLEAR), St. Michael's Hospital, Toronto, ON, Canada.
19. Paediatric Outcomes Research Team, The Hospital for Sick Children (SickKids), University of Toronto, Canada
20. Department of Paediatrics, St Michael's Hospital, Toronto, Canada.
21. Department of Medicine, University of Toronto Faculty of Medicine, Toronto, Ontario, Canada
22. Centre for Healthcare Analytics Research and Training, St Michael's Hospital, Toronto, Canada
23. Dalla Lana School of Public Health, University of Toronto, Toronto, Ontario, Canada

Key words: otitis media, upper respiratory tract infection, dental caries, xylitol, sorbitol

Correspondence to Dr. Nav Persaud; [nav.persaud@utoronto.ca](mailto:nav.persaud@utoronto.ca).

Word count: 4596

## ABSTRACT

### Introduction

Xylitol (or “birch sugar”) is a naturally occurring sugar with antibacterial properties that has been used as a natural non-sugar sweetener in chewing gums, confectionery, toothpaste and medicines. In this preventative randomized trial, Xylitol will be tested for the prevention of acute otitis media (AOM), a common and costly condition in young children. The primary outcome will be the incidence of AOM. Secondary outcomes will include upper respiratory tract infections (URTIs) and dental caries.

### Methods and analysis

This study will be a pragmatic, blinded (participant and parents, practitioners and analyst), two-armed superiority; placebo randomized controlled trial (RCT) with 1:1 allocation, stratified by clinical site. The trial will be conducted in the eleven primary care group practices participating in the TARGet Kids! research network in Canada. Eligible participants between the ages of 2-4 years will be randomly assigned to the intervention arm of regular xylitol syrup use or the control arm of regular sorbitol use for 6 months. We expect to recruit 236 participants, per treatment arm, to detect a 20% relative risk reduction in AOM episodes. AOM will be identified through chart review. The secondary outcomes of URTIs and dental caries will be identified through monthly phone calls with specified questions.

### Ethics and dissemination

Ethics approval from the Research Ethics Boards at the Hospital for Sick Children and St. Michael's Hospital has been obtained for this study and also for the TARGet Kids! research network. Results will be submitted for publication to a peer-reviewed journal and will be discussed with decision makers.

**Trial registration number:** NCT03055091 (clinicaltrials.gov)

### Strengths and limitations of this study

- This is the first pragmatic trial in Canada determining whether regular xylitol syrup use is effective in preventing AOM in children under the age of 4 years (who are most likely to have AOM).
- The trial will be conducted through the TARGet Kids! primary care research network allowing for a multicenter study performed through routine primary care visits.
- The six months of treatment and outcome assessment will allow the evaluation of the longer term effects of xylitol.
- A challenge for trials with acute otitis media as an outcome is that parents may not distinguish AOM from other URTIs with similar symptoms and may not seek care; we will include both clinician-diagnosed AOM and parent-reported URTIs as separate outcomes.

## INTRODUCTION

1  
2  
3 Acute otitis media (AOM) is a common and costly condition in young children.<sup>1</sup> The annual  
4 global incidence of AOM is 700 million per year and 50% of those affected are children under  
5 the age of 5 years.<sup>2</sup> By age 3 years, 84% of children have had at least one episode of AOM and  
6 46% have had 3 or more episodes.<sup>3</sup> Antibiotic treatment has only a modest effect on AOM  
7 duration<sup>4</sup> and does not prevent serious complications such as mastoiditis or meningitis which can  
8 rarely be fatal.<sup>5 6</sup> Most (>80%) children with AOM presenting for care have spontaneous  
9 symptom resolution within 3 days and the number needed to treat for antibiotic treatment to  
10 reduce symptom duration is 20 days, which must be balanced by a number needed to harm (with  
11 adverse effects of antibiotics such as diarrhea) of 14 days.<sup>4</sup> The incidence of mastoiditis has not  
12 changed over time despite changes in antibiotic prescribing.<sup>5 6 7</sup> Rare sequelae of AOM include  
13 delayed cognitive development, impaired communication skills and permanent hearing loss.<sup>3</sup>  
14 Parents of children with otitis media report missing 2-3 days of work per episode.<sup>1</sup>

15  
16 Another common and costly infectious disease amongst North American pre-school aged  
17 children is upper respiratory tract infections (URTIs).<sup>8 9 10-12</sup> URTIs are the most common reason  
18 for emergency department visits and unscheduled outpatient visits in Canada, accounting for  
19 10% of emergency department visits for children under 10 years of age.<sup>13 14 15</sup> URTIs are also the  
20 most common reason for unscheduled visits to a care provider and Canadian children experience  
21 3-8 URTIs per year at a cost to the healthcare system of several hundred million dollars per year.  
22  
23  
24

25 Nearly 30% of 2-5 year old children have dental caries.<sup>19</sup> Dental caries may lead to pain,  
26 difficulty eating and speaking, and can harm a child's self-esteem.<sup>20</sup> Treating dental caries in  
27 young children is challenging for practitioners, painful for the children and caries cost thousands  
28 of dollars to treat, with complicated caries requiring hospitalization costing several times more  
29 (and rarely resulting in death).<sup>21 22 23 24 25 26</sup>

30  
31 *In vitro* studies have shown that xylitol can reduce the attachment of bacteria that cause  
32 AOM, URTIs, and dental caries such as *Streptococcus Pneumoniae* and *Haemophilus Influenzae*  
33 to nasopharyngeal cells. AOM occurs when the upper airway is colonized with bacteria, viruses  
34 or a combination of both that travel from the nasopharynx to the middle ear by way of the  
35 Eustachian tube.<sup>27</sup> A Cochrane systematic review of the safety and efficacy of xylitol in  
36 preventing AOM in children up to 12 years of age found that there is fair evidence supporting the  
37 use of xylitol for the prevention of AOM (risk ratio, 0.75; 95% CI, 0.65 to 0.88 based on 3 RCTs  
38 from the same research group, studying 1826 children in total), but concluded that an adequately-  
39 powered, well designed trial is necessary.<sup>28</sup> Previous trials have not established whether regular  
40 xylitol syrup use is effective at preventing AOM in young children (<4 years) who are most  
41 likely to have AOM. Several RCTs of xylitol for the prevention of dental caries indicate that the  
42 antimicrobial effect of xylitol (which is posited to account for its efficacy in preventing AOM)  
43 increases with duration of use.<sup>29 30 31</sup> Therefore, the effect of the same dose of xylitol may be  
44 more effective at preventing AOM over the 6 month study period in the proposed study than it  
45 was in the previous trials that lasted 2 or 3 months.<sup>32</sup> The longer trials of xylitol for the  
46 prevention of dental caries also demonstrate that daily xylitol administration is safe, feasible and  
47 well tolerated for the 6 month study period in the proposed trial.<sup>29 30 31</sup> A pilot study of higher  
48 concentrations of xylitol syrup in young children found good compliance and tolerability.<sup>33</sup> In  
49 summary, regular xylitol syrup used for the 6 month study period is safe and feasible, and there  
50 is clinical equipoise over its effectiveness at preventing AOM in young children. There is no  
51 recommendation for or against the use of xylitol in the United States or in Canada. The paucity  
52  
53  
54  
55  
56  
57  
58  
59  
60

1  
2  
3 of high quality randomized controlled trials has been cited as a reason for the lack of consistent  
4 recommendations regarding the use of xylitol in young children.<sup>34</sup>

5 The primary purpose of this study is to determine if regular use of xylitol syrup  
6 effectively prevents AOM in unselected 2-4 year old children. Such an intervention could  
7 increase the productivity of parents and caregivers, reduce serious complications and reduce the  
8 suffering of young children - each episode of AOM involves several excess hours of crying for  
9 two to seven days.<sup>35</sup> This trial could change clinical practice if the results are positive. In several  
10 other countries xylitol is recommended for the prevention of dental caries. For example, the  
11 *American Academy of Pediatric Dentists* recommends regular xylitol use for the prevention of  
12 dental caries based on the results of eight clinical trials.<sup>36</sup> However, a survey of American  
13 pediatricians found that few physicians (12%) recommend xylitol to patients and that most  
14 would either definitely (68%) or possibly (29%) recommend xylitol if there was additional  
15 evidence that it prevented AOM.<sup>37</sup>

## 18 19 **AIMS AND OBJECTIVES**

### 21 22 **Primary Question**

23 Does regular xylitol syrup use for 6 months reduce the number of physician-diagnosed AOM  
24 episodes in children aged 2-4 years?

### 25 26 27 **Secondary Questions**

28 (1) Does regular xylitol syrup use reduce the number of parent-reported upper respiratory tract  
29 infection (URTI) episodes in children aged 2-4 years?

30 (2) Does regular xylitol syrup use reduce parent-reported dental caries in children aged 2-4  
31 years?  
32

## 33 34 35 **METHODS AND ANALYSIS**

### 36 37 **Study Design**

38 This will be a pragmatic, blinded (participant and parents, practitioners and analyst), two-armed  
39 superiority; placebo controlled randomized trial with 1:1 allocation, stratified by clinical site.

### 40 41 42 **Setting**

43 The trial will be conducted in the eleven primary care group practices currently participating in  
44 the TARGet Kids! research network ([www.targetkids.ca](http://www.targetkids.ca)) in Canada. There are no sites outside of  
45 Canada.  
46

### 47 48 **Eligibility Criteria**

49 The patients in this study are healthy children aged 2-4 years who are participants of The  
50 Applied Research Group for Kids (TARGet Kids!), the largest pediatric primary care practice-  
51 based research network in Canada focused on child health ([www.targetkids.ca](http://www.targetkids.ca)).  
52

53  
54 **Inclusion criteria:** age 24-48 months at start of intervention, and parent or care provider able to  
55 give consent for participation including being able to understand the information provided in  
56  
57  
58  
59

English. All children recruited to this study will also be participants in the TARGet Kids! research network.

**Exclusion criteria:** craniofacial malformations, structural middle ear abnormalities, sibling or any other child living at the same address already enrolled in the trial (in order to prevent contamination), insertion of ventilation tubes prior to study period, current use of a xylitol product or reported xylitol sensitivity.

## Consent

Consent will be obtained by one of two methods:

1. For participants with an upcoming scheduled health visit: An invitation to participate will be mailed to participants along with the consent form two weeks prior to their scheduled health visit. At the visit a trained TARGet Kids! Research Assistant will review the eligibility criteria and the consent form with the parents/caregivers. Research Assistants will answer any questions in person.
  2. For eligible TARGet Kids! participants without a scheduled visit: An invitation to participate will be mailed to participants along with the consent form. Parents/caregivers will have the opportunity to contact the Study Coordinator at any time (by email/phone) to answer questions. The consent form will be mailed back to the site.
- Any participant that no longer wishes to participate in TARGet Kids! will not be approached.

## Intervention arm

Xylitol (or “birch sugar”) is a naturally occurring sugar with antibacterial properties that has been used as a natural non-sugar sweetener in chewing gums, confectionery, toothpaste and medicines.<sup>27 38 39</sup>

The investigational agents will be provided by XLEAR, a producer of commercial xylitol products that are sold in Canada. The product specifications used for this agent is that of their syrup or “tooth gel” products sold in 60 mL tubes. The product is approved by Health Canada as a food additive. The product has a shelf life of 2 years based on stability studies. Each tube is labeled with a best before date and a lot number on the tube crimp.

The experimental intervention is the provision of xylitol syrup (35% Xylitol concentration per weight) and instructions to ingest is 3-5 times per day. Each dose will be 5 mL of 350 g/L, therefore the maximum possible daily dose will be 9 g of xylitol per day. This is the daily dose that may be effective from previous trials.<sup>32</sup>

## Control Arm

The control intervention is the provision of sorbitol syrup (looks, smells and tastes like the xylitol syrup but is not an antimicrobial). Sorbitol is unlikely to have an effect on our primary outcome of AOM or the secondary outcomes of URTIs and dental caries; therefore it can be used as a placebo. The sorbitol syrup formulation is the same as the xylitol syrup except the concentration of sorbitol will be 30% by weight. The instructions for use are 3-5 times per day. Each dose will be 5 mL of 300 g/L of sorbitol; therefore the maximum daily dose will be 7.5 g of sorbitol.

XLEAR will produce the investigational agents through a dedicated production run and ship the products to the research pharmacy in a timely manner. This will allow preparation and shipment of the kits for each participant prior to the intervention period.

1  
2  
3  
4 The data coordinating center will create master randomization tables and send these to  
5 the research pharmacy for dispensing. The study statistician will create the master randomization  
6 table using a computer-generated, site-stratified, block randomization design. The research  
7 pharmacy will use the randomization table for the dispensation of the investigational agents to  
8 each participant.  
9

### 10 **Intervention period**

11 The treatment period will be 6 months for all participants. The intervention will be given during  
12 the winter season.

13 The follow-up period is identical to the treatment period, and so will also be 6 months for all  
14 participants (see Figure 1).

15 Conducting the trial during winter months will maximize the efficiency of the trial because  
16 AOM and URTI incidences are highest during that time.<sup>40</sup> Since xylitol is not a treatment for  
17 infections, care will be provided as normal for any suspected infections.  
18  
19

### 20 **Premature Withdrawal/Discontinuation Criteria**

21 Xylitol is sweet and children generally enjoy consuming it.<sup>33</sup> The number of missed doses in  
22 previous trials with frequent daily dosing was around 10%.

23 Parents will be called two weeks after they have been given the package to discuss any  
24 challenges with compliance, as well as during monthly follow-up calls.

25 Based on data from previous trials conducted in the TARGet Kids! research network and  
26 the fact that the primary outcome will be determined using a chart review, we anticipate a low (<  
27 5%) rate of being lost to follow-up in this trial where follow-up does not require any special  
28 visits for research purposes only. If a participant leaves the primary care practice, we will  
29 attempt to obtain the name of the current care provider and obtain the chart for review. If a  
30 participant has left the primary care practice and we are unable to contact the parents or  
31 caregivers, we will treat the data as missing. Despite this, the sample size calculation assumes  
32 10% of participants will not complete follow-up.  
33  
34  
35

### 36 **Outcome Measures**

#### 37 **Primary outcome**

38 The primary outcome of the total number of physician-diagnosed AOM episodes will be  
39 assessed by reviewing charts of the primary care provider and any other care providers reported  
40 by parents or caregiver at monthly phone calls.

41 Three methods for determining the diagnosis of AOM have been used in trials: clinical  
42 signs (bulging and red tympanic membrane), clinical signs with tympanometry, and clinical signs  
43 with tympanocentesis.<sup>41</sup> In this trial, the number of AOM episodes will be assessed using both  
44 objective clinical signs of AOM recorded in the chart and a physician's diagnosis of AOM. In  
45 order to make a diagnosis of AOM for this trial, the chart must contain *both* the documentation  
46 of signs of AOM (e.g. erythematous tympanic membrane) plus the practitioners' diagnosis that  
47 the patient had AOM. The addition of tympanometry to clinical signs does not necessarily  
48 improve the accuracy of AOM diagnosis.<sup>42</sup> Although tympanometry is recommended by some  
49 guidelines, it is not employed in routine clinical practice at any of the TARGet Kids! sites.  
50 Tympanocentesis is therapeutic and can prevent subsequent AOM episodes<sup>41</sup> so it cannot be used  
51 in this trial of AOM prevention (and it requires instruments not present in primary care sites).  
52  
53  
54  
55  
56  
57  
58  
59

1  
2  
3 Four of the five previous trials of xylitol for the prevention of AOM employed clinical signs with  
4 tympanometry, and one used clinical signs to determine the number of AOM episodes.<sup>32</sup>

5 Previous RCTs of AOM *management* in young children have relied on the diagnoses  
6 made by primary care providers (who are generally the clinicians who diagnose AOM for  
7 clinical purposes).<sup>43 44</sup> The studies, involving longer study periods, used chart reviews to  
8 determine the number of AOM episodes just as we will in this trial (*Appendix 1*).<sup>44</sup>

9 We have conducted a chart review of 1,637 patients in the TARGet Kids! research network using  
10 a method similar to those in completed RCTs of AOM that involves reviewing charts for  
11 physical examination findings consistent with AOM and a diagnosis or assessment of AOM.<sup>45 43</sup>

12  
13  
14  
15  
16  
17  
18  
19  
20  
21  
22  
23  
24  
25  
26  
27  
28  
29  
30  
31  
32  
33  
34  
35  
36  
37  
38  
39  
40  
41  
42  
43  
44  
45  
46  
47  
48  
49  
50  
51  
52  
53  
54  
55  
56  
57  
58  
59  
60  
44 In all of the episodes, the physical examination findings and the diagnosis were clearly  
documented in the chart (the term “AOM” was usually recorded in the assessment portion of the  
note), and there was perfect agreement between independent reviewers.

In addition to reviews of the patient’s primary care provider medical record, the primary  
outcome will also include AOM episodes diagnosed by other care providers (e.g., at walk-in  
clinics or emergency rooms). Parental consent for release of this information will be obtained,  
and charts will be reviewed upon the end of follow-up period.  
The primary analysis will be the total number of AOM episodes during the study period. We will  
also summarize the time to first AOM using survival curves.

A limitation of employing physician-diagnosed episodes of AOM is that parents may not  
seek care when their child has AOM symptoms. This limitation is addressed with the secondary  
outcome of parent reported URTIs (*see secondary outcomes below*). Another limitation of  
physician-diagnosed AOM is that there is variability in the diagnosis of AOM by clinicians, with  
one study of administrative data indicating that some clinicians diagnose AOM twice as often as  
others.<sup>41 46 47</sup> Since the clinicians will be blinded to the allocated group, differences in clinical  
assessment will not bias the results. If there is a substantial number of incorrect physician  
diagnosed episodes of AOM (false positives), there results will be biased against the efficacy of  
xylitol.

Note that our sample size calculation incorporates the incidence of AOM in the TARGet  
Kids! study population and so it takes into consideration the rate of AOM diagnosis by the same  
clinicians who will diagnose AOM in these study participants.

## Secondary outcomes

The secondary outcome parent-reported URTI episodes will be assessed during monthly phone  
calls. A challenge in all trials that employ AOM as an outcome is the combined effect of two  
factors: (1) parents often decide not to seek care when a child has symptoms that may indicate  
AOM and (2) parents cannot distinguish between AOM and other URTIs because the symptoms  
are similar. We will address this challenge with our secondary outcome: parent-reported URTIs,  
a very common and costly (in aggregate) condition in early childhood.<sup>17 48</sup> The previous shorter  
(2 to 3 month) trials of xylitol found a non-significant trend towards fewer URTI episodes in  
children receiving xylitol.<sup>32</sup>

A cohort study of children aged 2 months to 12 years receiving care at Toronto primary  
care sites found that medical consultation was sought in only 56% of episodes of URTI  
symptoms.<sup>49</sup> This is not surprising given that guidelines recommend against antibiotics for AOM  
and other URTIs in many cases. As many parents are aware of this recommendation from  
previous clinic visits, they may decide to treat children with analgesics and antipyretics without  
seeking care even if they believe the child has an AOM.<sup>50</sup> Thus, information about the total

1  
2  
3 number of URTI episodes must be obtained directly from parents and caregivers as it will not be  
4 found in a patient's medical record even if it includes records from all institutions and clinics.  
5 Parents may not diagnose AOM accurately based on symptoms because they overlap  
6 substantially with symptoms of URTIs.<sup>51</sup> Irritability and crying are the most common symptoms  
7 in AOM and URTI episodes.<sup>52</sup> Forty percent of children *with* AOM do *not* have an earache and  
8 31% do *not* have a fever,<sup>51</sup> while 72% of children *without* AOM exhibit symptoms of AOM  
9 (crying, fever or ear ache).<sup>52</sup>

10  
11 Like previous studies, we will employ structured telephone interviews to assess the  
12 number of URTI episodes.<sup>53 54 55</sup> Parents or caregivers will be contacted every month and asked  
13 to report the number of URTIs the child has experienced since the last call (or since the  
14 beginning of the trial for the first call) using validated questions (*Appendix 1*).<sup>55</sup> We will employ  
15 the symptoms in the Canadian Acute Respiratory Illness and Flu (CARIF) scale that has been  
16 validated in this population.<sup>56</sup>

17  
18 The secondary outcome, parent-reported dental caries, will also be assessed during the  
19 monthly phone calls. Parents or caregivers will be asked if they have been informed by a dentist  
20 or a physician that their child has or has had at least one or more dental caries (*Appendix 1*). This  
21 question has been used and validated in several epidemiological studies.<sup>57 58 59 60</sup> The dental  
22 caries secondary outcome will be binary (at least one versus none). Those with caries at baseline  
23 will be excluded from this analysis but included in all other analyses.

## 24 25 26 Other measures

27 Health economics measures will be collected for an economic evaluation. We will compare the  
28 cost-effectiveness of the xylitol syrup against the control group using the net benefit regression  
29 framework from the perspective of the parents (who will be the payer for the syrup).<sup>61</sup> Costs will  
30 include costs incurred to the parents or caregivers such as their usual mode of transportation for  
31 attending medical appointments (collected during an extended phone call at the four month call).  
32 <sup>61</sup> The parent or caregiver hours of productivity (including employment) lost due to the child's  
33 AOM episodes (including, for example, the days the child could not attend daycare) will also be  
34 assessed during the monthly calls. The use of net benefit regression allows the economic  
35 evaluation to be conducted using regression methods (adjusting for potential confounders). The  
36 main outcome of the economic evaluation will be an incremental net benefit of xylitol syrup (in  
37 term of cost and number of physician-diagnosed AOM episodes) compared to control. In  
38 addition, we will estimate incremental cost-effectiveness ratios (e.g., an incremental cost per one  
39 physician-diagnosed AOM episode avoided and an incremental cost per one URTI episode  
40 avoided). Statistical uncertainty will be characterized using a 95% confidence interval and cost-  
41 effectiveness acceptability curves.<sup>62</sup>

42  
43  
44  
45 Compliance (reported number of doses given per week) will be assessed during the  
46 monthly calls and by tallying the number of returned doses at the end of the study.

## 47 48 Sample size rationale

49 We used the results of three previous RCTs of xylitol for the prevention of AOM and data from  
50 participants in the TARGet Kids! research network to estimate the sample size.

51 In a chart review of TARGet Kids! research network participants, we found a comparable  
52 event rate as the control groups in the trials above: 670 episodes of AOM in 1637 patients (41%)  
53 over a three month period (0.14 AOM episodes per patient-month).  
54  
55  
56  
57  
58  
59



1  
2  
3 Since the data currently available suggest that the AOM rate is about 1.6 episodes per  
4 patient-year, we will somewhat conservatively assume a control event rate of 1.5. We will aim to  
5 detect a relative risk of 0.8 (i.e. relative risk reduction of 20%) with 80% power and  $\alpha = 0.05$   
6 (two-sided). A 20% RRR was chosen based on previous surveys of reasons physicians do not  
7 currently recommend xylitol and the RRR used in previous trials.<sup>32 37</sup> The sample size  
8 calculations assumed a Poisson distribution for the number of AOM episodes and were based on  
9 the asymptotic distribution of the likelihood ratio test statistic. Calculations were performed in R  
10 (2.15.3) using the *asypow* package and power was confirmed via 10,000 simulations. The  
11 required sample size is 236 per group. (Note that while the number of participants is less than  
12 one of the previous trials<sup>63</sup>, the mean treatment and follow-up period in our study will be  
13 longer.) The above calculations take into consideration non-compliance and a loss to follow-up  
14 of 10% of participants only completing 50% of the follow-up period. These calculations assume  
15 there will be no substantial contamination. While xylitol preparations are commercially  
16 available, the dose of xylitol is less than one-tenth the dose found in trials to be effective at  
17 preventing AOM. A survey of TARGeT Kids! participants showed that xylitol use is rare (< 5%).  
18 Siblings of those already enrolled in the trial will be excluded since contamination would be  
19 likely if two members of the family are enrolled and allocated to different arms.  
20  
21  
22

23 We expect to recruit 40 participants per month. Thus sufficient patients will be recruited  
24 during two calendar years for the intervention to take place over two winter seasons. A previous  
25 RCT in the TARGeT Kids! research network with similar inclusion criteria, exclusion criteria and  
26 recruitment strategy successfully recruited more than 66 children each month for two years when  
27 the network was smaller.<sup>64</sup> Parents of children who are participating in the TARGeT Kids!  
28 research network's longitudinal study will be approached by research assistants regarding this  
29 RCT during routine primary care visits throughout the year. Randomization will take place just  
30 before the intervention begins so the small number of patients who are recruited but leave the  
31 practice before the intervention period will not be randomized.  
32

33 We will determine if xylitol is more effective in younger children (24-36 months old  
34 versus >36 months old at time of recruitment).  
35  
36

### 37 **Statistical Analysis**

38 The primary analysis will be performed based on the intention to treat population. The primary  
39 outcome will be analyzed with a Poisson regression model. To account for participants who do  
40 not complete the entire planned follow-up and slight variations in the observation time for  
41 completers, the logarithm of follow-up time will be added as an offset term to the model. The  
42 treatment effect, expressed as a rate ratio (relative risk), and 95% confidence interval will be  
43 obtained from the model. A secondary analysis will adjust for characteristics with an imbalance  
44 between groups at baseline. Patient demographics will be summarized descriptively (e.g., means  
45 and SD or median and IQR for continuous variables and frequency and percentages for  
46 categorical). Although randomization guarantees balance in the long-run, there is a chance of  
47 imbalances in any sample. The demographics will be reviewed for clinically important  
48 imbalances that may be adjusted for in a secondary analysis. The secondary outcomes, number of  
49 URTI episodes and dental caries, will be analyzed similarly to the primary outcome.  
50  
51  
52

### 53 **Safety Analysis**

54 A data safety monitoring board is not necessary because xylitol has been demonstrated to be safe  
55 in previous trials for the prevention of AOM and dental caries, and the maximum possible  
56  
57  
58  
59  
60

1  
2  
3 efficacy can be estimated from previous trials. We therefore do not anticipate any reason to stop  
4 the trial early.

5  
6 Xylitol can rarely cause osmotic diarrhea and abdominal discomfort. In previous trials,  
7 approximately 1% of children exposed to xylitol experienced diarrhea and slightly less than 1%  
8 of children exposed to control substances (e.g., sorbitol) experienced diarrhea (difference not  
9 statistically significant).<sup>45</sup> The vast majority of children, including 2-4 year olds, are able to  
10 tolerate total daily doses of 45g of xylitol without significant gastrointestinal side effects.<sup>32 35</sup> The  
11 maximum total daily dose of xylitol in this trial will be 10g per day.

12  
13 In previous trials, a total of more than 1000 children were exposed to various  
14 formulations of xylitol or control substances and there were no reported episodes of choking or  
15 aspiration. The control intervention is the provision of sorbitol syrup which can cause diarrhea  
16 but at similar rates as xylitol.<sup>65</sup> Despite this, the consent form will alert parents to the potential  
17 of diarrhea.

### 18 19 **Adverse events**

20 All adverse events will be reported to the Hospital for Sick Children or St. Michael's Hospital  
21 Research Ethics Board according to their adverse event reporting requirements. All adverse drug  
22 reactions to the study medication will be reported to Health Canada within 15 calendar days or  
23 for death or life-threatening events, within 7 calendar days. In the latter case, a follow-up report  
24 must be filed within 8 calendar days. Serious adverse events and serious unexpected adverse  
25 events will be reported to the Natural and Non-prescription Health Products Directorate  
26 (NNHPD) in an expedited manner.

27  
28 To maintain the overall quality of the trial, unblinding will only be performed in  
29 exceptional circumstances when knowledge of the actual treatment is essential for management  
30 of the patient. If unblinding is deemed to be necessary by the investigator, the investigator will  
31 contact the coordinating center by telephone to ascertain the allocation group and communicate  
32 this to the participant's clinician and caregiver. The research staff will not be informed of the  
33 allocation group. Unblinding will not necessarily be a reason for discontinuation or exclusion  
34 from the analysis.

### 35 36 37 **Management**

38 The Applied Health Research Centre (AHRC) will be responsible for trial data coordination,  
39 database development, data management and statistical analysis. Study data and patient surveys  
40 will be entered and maintained on a secure password protected database developed using  
41 REDCap® ([www.project-redcap.org](http://www.project-redcap.org)) and will be accessible via the internet for data entry  
42 purposes. Quality and completeness of data entry will be reviewed as soon as possible after data  
43 entry, within 5 business days of data entry for the first 5 participants randomized at each site, and  
44 within 15 days of data entry thereafter. Corrections or changes in REDCap® are tracked with  
45 the retention of the original data and the corrected data with the date of data entry and submitting  
46 personnel.

### 47 48 49 **Patient and Public Involvement**

50 Patients were not directly involved in the development of the research question or the design of  
51 the study. A written summary of the study results will be sent to participants by email or by mail.  
52 The burden of the intervention on patients was not assessed prior to the start of the trial.  
53  
54  
55  
56  
57  
58  
59

### Ethics and dissemination

The *TARGet Kids!* research platform has been approved by the Research Ethics Board at the Hospital for Sick Children and St Michael's Hospital, as well as the other affiliated sites. Ethics approval for this study has been obtained for all participating sites. Results of the study will be submitted for publication to a peer-reviewed journal and will be discussed policy and decision makers.

### SUMMARY

In summary, AOM, URTIs and dental caries are common and costly conditions in young children that might be prevented by regular xylitol use. Existing evidence indicates clinical equipoise on the efficacy of xylitol syrup in preventing AOM, URTIs and dental caries in preschool aged children. Evidence from previous long-term trials of xylitol for the prevention of dental caries has demonstrated that the intervention is well tolerated and feasible in this age group. The *TARGet Kids!* research network has a demonstrated record of conducting RCTs in young children and its existing research infrastructure will be mobilized to ensure that this trial will be completed efficiently and on schedule.

AOM and URTIs are commonly viewed as unavoidable during early childhood. This trial has the potential to transform the approach to these three common conditions.

### Author Contributions

The following authors contributed substantially to conception and the design of the protocol: NP, AL, AA, CB, JH, WI, JM, MM, KT, CA, DM, CK, FB, and PP.

The following authors drafted the manuscript: NP and FB.

The following authors revised the manuscript critically for important intellectual content: NP, AL, AA, CB, JH, WI, JM, MM, KT, CA, DM, CK, FB, and PP.

The following authors approved the final manuscript: NP, AL, AA, CB, JH, WI, JM, MM, KT, CA, DM, CK, FB, PP.

The following authors are accountable for all aspects of the work in ensuring that questions related to the accuracy or integrity of any part of the work are appropriately investigated and resolved: NP, AL, AA, CB, JH, WI, JM, MM, KT, CA, DM, CK, FB, and PP.

Members of the *TARGet Kids!* Collaboration contribute to data collection and provide general input on research directions.

### Funding

The study is funded by the Canadian Institutes of Health Research (CIHR). NP received salary support from a CIHR RCT training grant and from a PSI Graham Farquharson Knowledge Translation Fellowship. There was no role of the manufacturer in the concept, design, implementation, data collection and analysis and permission to publish. The products were purchased from the manufacturer using public research funding.

### Competing interests

There are no competing interests. PP reports receiving the following grants unrelated to this study: a grant from Hospital for Sick Children Foundation during the conduct of the study; a

grant from Canadian Institutes of Health Research (FRN # 115059) for an ongoing investigator-initiated trial of iron deficiency in young children, for which Mead Johnson Nutrition provides non-financial support (Fer-In-Sol® liquid iron supplement). These agencies had no role in the design, collection, analyses or interpretation of the results of this study or in the preparation, review, or approval of the manuscript.

## REFERENCES

1. Dube E, De Wals P, Gilca V, et al. Burden of acute otitis media on Canadian families. *Can Fam Physician* 2011;57(1):60-5.
2. Monasta L, Ronfani L, Marchetti F, et al. Burden of disease caused by otitis media: systematic review and global estimates. *PLoS One* 2012;7(4):e36226. doi: 10.1371/journal.pone.0036226
3. Teele DW, Klein JO, Rosner B. Epidemiology of otitis media during the first seven years of life in children in greater Boston: a prospective, cohort study. *J Infect Dis* 1989;160(1):83-94.
4. Venekamp RP, Sanders S, Glasziou PP, et al. Antibiotics for acute otitis media in children. *Cochrane Database Syst Rev* 2013(1):CD000219. doi: 10.1002/14651858.CD000219.pub3
5. Anthonsen K, Hostmark K, Hansen S, et al. Acute mastoiditis in children: a 10-year retrospective and validated multicenter study. *Pediatr Infect Dis J* 2013;32(5):436-40. doi: 10.1097/INF.0b013e31828abd13
6. Palma S, Bovo R, Benatti A, et al. Mastoiditis in adults: a 19-year retrospective study. *Eur Arch Otorhinolaryngol* 2014;271(5):925-31. doi: 10.1007/s00405-013-2454-8
7. Kvaerner KJ, Austeng ME, Abdelnoor M. Hospitalization for acute otitis media as a useful marker for disease severity. *Pediatr Infect Dis J* 2013;32(9):946-9. doi: 10.1097/INF.0b013e318297c436
8. Heikkinen T, Jarvinen A. The common cold. *Lancet* 2003;361(9351):51-9. doi: 10.1016/S0140-6736(03)12162-9
9. Lambert SB, Allen KM, Druce JD, et al. Community epidemiology of human metapneumovirus, human coronavirus NL63, and other respiratory viruses in healthy preschool-aged children using parent-collected specimens. *Pediatrics* 2007;120(4):e929-37. doi: 10.1542/peds.2006-3703
10. Lambert SB, Allen KM, Carter RC, et al. The cost of community-managed viral respiratory illnesses in a cohort of healthy preschool-aged children. *Respir Res* 2008;9:11. doi: 10.1186/1465-9921-9-11
11. Kvaerner KJ, Nafstad P, Jaakkola JJ. Upper respiratory morbidity in preschool children: a cross-sectional study. *Arch Otolaryngol Head Neck Surg* 2000;126(10):1201-6.
12. Hendley JO. Epidemiology, pathogenesis, and treatment of the common cold. *Seminars in Pediatric Infectious Diseases* 1998;9(1):50-55. doi: 10.1016/S1045-1870(98)80051-4
13. Burt CW, McCaig LF, Rechtsteiner EA. Ambulatory medical care utilization estimates for 2005. *Adv Data* 2007(388):1-15.
14. Schanzer DL, Langley JM, Tam TW. Hospitalization attributable to influenza and other viral respiratory illnesses in Canadian children. *Pediatr Infect Dis J* 2006;25(9):795-800. doi: 10.1097/01.inf.0000232632.86800.8c
15. Canadian Institute of Health Information. National Ambulatory Care Reporting System. 2005
16. Public Health Agency of Canada. Economic Burden of Illness in Canada, 2005-2008, 2014.
17. Thomas E. Recent trends in upper respiratory infections, ear infections and asthma among young Canadian children *Health Reports* 2010;21(4)
18. Schanzer DL, Langley JM, Tam TW. Role of influenza and other respiratory viruses in admissions of adults to Canadian hospitals. *Influenza Other Respir Viruses* 2008;2(1):1-8. doi: 10.1111/j.1750-2659.2008.00035.x

19. National Center for Caries Disease Prevention and Health Promotion. Oral Health Resources - Children's Oral Health Overview. 2006
20. Nunn ME, Dietrich T, Singh HK, et al. Prevalence of early childhood caries among very young urban Boston children compared with US children. *J Public Health Dent* 2009;69(3):156-62. doi: 10.1111/j.1752-7325.2008.00116.x
21. Griffin SO, Gooch BF, Beltran E, et al. Dental services, costs, and factors associated with hospitalization for Medicaid-eligible children, Louisiana 1996-97. *J Public Health Dent* 2000;60(1):21-7.
22. Casamassimo PS, Thikkurissy S, Edelstein BL, et al. Beyond the dmft: the human and economic cost of early childhood caries. *J Am Dent Assoc* 2009;140(6):650-7.
23. Ettelbrick KL, Webb MD, Seale NS. Hospital charges for dental caries related emergency admissions. *Pediatr Dent* 2000;22(1):21-5.
24. Colak H, Dulgergil CT, Dalli M, et al. Early childhood caries update: A review of causes, diagnoses, and treatments. *J Nat Sci Biol Med* 2013;4(1):29-38. doi: 10.4103/0976-9668.107257
25. Association of Dental Surgeons of British Columbia. Children's dentistry task force report. 2001
26. Bertness JH, K. Promoting awareness, preventing pain: Facts on early childhood caries (ECC) (2nd ed.). *National Maternal and Child Oral Health Resource Center* 2004
27. Kontiokari T, Uhari M, Koskela M. Antiadhesive effects of xylitol on otopathogenic bacteria. *J Antimicrob Chemother* 1998;41(5):563-5.
28. Azarpazhooh A, Lawrence HP, Shah PS. Xylitol for preventing acute otitis media in children up to 12 years of age. *Cochrane Database Syst Rev* 2016(8):CD007095. doi: 10.1002/14651858.CD007095.pub3
29. Kandelman D, Gagnon G. A 24-month clinical study of the incidence and progression of dental caries in relation to consumption of chewing gum containing xylitol in school preventive programs. *J Dent Res* 1990;69(11):1771-5. doi: 10.1177/00220345900690111201
30. Mickenautsch S, Leal SC, Yengopal V, et al. Sugar-free chewing gum and dental caries: a systematic review. *J Appl Oral Sci* 2007;15(2):83-8.
31. Makinen KK, Jarvinen KL, Anttila CH, et al. Topical xylitol administration by parents for the promotion of oral health in infants: a caries prevention experiment at a Finnish Public Health Centre. *Int Dent J* 2013;63(4):210-24. doi: 10.1111/idj.12038
32. Azarpazhooh A, Limeback H, Lawrence HP, et al. Xylitol for preventing acute otitis media in children up to 12 years of age. *Cochrane Database Syst Rev* 2011(11):CD007095. doi: 10.1002/14651858.CD007095.pub2
33. Vernacchio L, Vezina RM, Mitchell AA. Tolerability of oral xylitol solution in young children: implications for otitis media prophylaxis. *Int J Pediatr Otorhinolaryngol* 2007;71(1):89-94. doi: 10.1016/j.ijporl.2006.09.008
34. Soderling E. Controversies around Xylitol. *Eur J Dent* 2009;3(2):81-2.
35. Tahtinen PA, Laine MK, Ruuskanen O, et al. Delayed versus immediate antimicrobial treatment for acute otitis media. *Pediatr Infect Dis J* 2012;31(12):1227-32. doi: 10.1097/INF.0b013e318266af2c
36. American Academy of Pediatric Dentistry. Guideline on Xylitol Use in Caries Prevention. 2011
37. Danhauer JL, Johnson CE, Rotan SN, et al. National survey of pediatricians' opinions about and practices for acute otitis media and xylitol use. *J Am Acad Audiol* 2010;21(5):329-46. doi: 10.3766/jaaa.21.5.5
38. Ly KA, Milgrom P, Rothen M. The potential of dental-protective chewing gum in oral health interventions. *J Am Dent Assoc* 2008;139(5):553-63.
39. Maguire A, Rugg-Gunn AJ. Xylitol and caries prevention--is it a magic bullet? *Br Dent J* 2003;194(8):429-36. doi: 10.1038/sj.bdj.4810022

- 1
- 2
- 3
- 4 40. Stockmann C, Ampofo K, Hersh AL, et al. Seasonality of acute otitis media and the role of respiratory
- 5 viral activity in children. *Pediatr Infect Dis J* 2013;32(4):314-9. doi:
- 6 10.1097/INF.0b013e31827d104e
- 7 41. Pichichero ME, Casey JR. Comparison of study designs for acute otitis media trials. *Int J Pediatr*
- 8 *Otorhinolaryngol* 2008;72(6):737-50. doi: 10.1016/j.ijporl.2008.02.020
- 9 42. Spiro DM, King WD, Arnold DH, et al. A randomized clinical trial to assess the effects of
- 10 tympanometry on the diagnosis and treatment of acute otitis media. *Pediatrics*
- 11 2004;114(1):177-81.
- 12 43. Spurling GK, Del Mar CB, Dooley L, et al. Delayed antibiotics for respiratory infections. *Cochrane*
- 13 *Database Syst Rev* 2013(4):CD004417. doi: 10.1002/14651858.CD004417.pub4
- 14 44. Little P, Gould C, Williamson I, et al. Pragmatic randomised controlled trial of two prescribing
- 15 strategies for childhood acute otitis media. *BMJ* 2001;322(7282):336-42.
- 16 45. Uhari M, Kontiokari T, Koskela M, et al. Xylitol chewing gum in prevention of acute otitis media:
- 17 double blind randomised trial. *BMJ* 1996;313(7066):1180-4.
- 18 46. Lyon JL, Ashton A, Turner B, et al. Variation in the diagnosis of upper respiratory tract infections and
- 19 otitis media in an urgent medical care practice. *Arch Fam Med* 1998;7(3):249-54.
- 20 47. Pichichero ME. Acute otitis media: Part I. Improving diagnostic accuracy. *Am Fam Physician*
- 21 2000;61(7):2051-6.
- 22 48. Canadian Institute for Health Information. The cost of acute care hospital stays by medical condition
- 23 in Canada: 2004-2005. Canada, 2008.
- 24 49. Saunders NR, Tennis O, Jacobson S, et al. Parents' responses to symptoms of respiratory tract
- 25 infection in their children. *CMAJ* 2003;168(1):25-30.
- 26 50. McWilliams CJ, Goldman RD. Update on acute otitis media in children younger than 2 years of age.
- 27 *Can Fam Physician* 2011;57(11):1283-5.
- 28 51. Heikkinen T, Ruuskanen O. Signs and symptoms predicting acute otitis media. *Arch Pediatr Adolesc*
- 29 *Med* 1995;149(1):26-9.
- 30 52. Niemela M, Uhari M, Mottonen M, et al. Costs arising from otitis media. *Acta Paediatr*
- 31 1999;88(5):553-6.
- 32 53. Dales RE, Cakmak S, Brand K, et al. Respiratory illness in children attending daycare. *Pediatr*
- 33 *Pulmonol* 2004;38(1):64-9. doi: 10.1002/ppul.20034
- 34 54. Quach C, Moore D, Ducharme F, et al. Do pediatric emergency departments pose a risk of infection?
- 35 *BMC Pediatr* 2011;11:2. doi: 10.1186/1471-2431-11-2
- 36 55. Vissing NH, Jensen SM, Bisgaard H. Validity of information on atopic disease and other illness in
- 37 young children reported by parents in a prospective birth cohort study. *BMC Med Res Methodol*
- 38 2012;12:160. doi: 10.1186/1471-2288-12-160
- 39 56. Jacobs B, Young NL, Dick PT, et al. Canadian Acute Respiratory Illness and Flu Scale (CARIFS):
- 40 development of a valid measure for childhood respiratory infections. *J Clin Epidemiol*
- 41 2000;53(8):793-9.
- 42 57. Roberts CR, Warren JJ, Weber-Gasparoni K. Relationships between caregivers' responses to oral
- 43 health screening questions and early childhood caries. *J Public Health Dent* 2009;69(4):290-3.
- 44 doi: 10.1111/j.1752-7325.2009.00126.x
- 45 58. Sealy PA, Farrell N, Hoogenboom A. Caregiver self-report of children's use of the sippy cup among
- 46 children 1 to 4 years of age. *J Pediatr Nurs* 2011;26(3):200-5. doi: 10.1016/j.pedn.2009.11.001
- 47 59. Nelson DE, Holtzman D, Bolen J, et al. Reliability and validity of measures from the Behavioral Risk
- 48 Factor Surveillance System (BRFSS). *Soz Praventivmed* 2001;46 Suppl 1:S3-42.
- 49 60. Toronto Public Health. Toronto Perinatal and Child Health Survey 2003. 2005
- 50
- 51
- 52
- 53
- 54
- 55
- 56
- 57
- 58
- 59
- 60

- 1  
2  
3 61. Hoch JS, Briggs AH, Willan AR. Something old, something new, something borrowed, something blue:  
4 a framework for the marriage of health econometrics and cost-effectiveness analysis. *Health*  
5 *Econ* 2002;11(5):415-30. doi: 10.1002/hec.678  
6  
7 62. Hoch JS, Rockx MA, Krahn AD. Using the net benefit regression framework to construct cost-  
8 effectiveness acceptability curves: an example using data from a trial of external loop recorders  
9 versus Holter monitoring for ambulatory monitoring of "community acquired" syncope. *BMC*  
10 *Health Serv Res* 2006;6:68. doi: 10.1186/1472-6963-6-68  
11  
12 63. Hautalahti O, Renko M, Tapiainen T, et al. Failure of xylitol given three times a day for preventing  
13 acute otitis media. *Pediatr Infect Dis J* 2007;26(5):423-7. doi:  
14 10.1097/01.inf.0000259956.21859.dd  
15  
16 64. Maguire JL, Birken CS, Loeb MB, et al. DO IT Trial: vitamin D Outcomes and Interventions in Toddlers  
17 - a TARGet Kids! randomized controlled trial. *BMC Pediatr* 2014;14:37. doi: 10.1186/1471-2431-  
18 14-37  
19  
20 65. Vernacchio L, Corwin MJ, Vezina RM, et al. Xylitol syrup for the prevention of acute otitis media.  
21 *Pediatrics* 2014;133(2):289-95. doi: 10.1542/peds.2013-2373  
22  
23

## 24 Figure Legend

25  
26 Figure 1. Timeline for intervention and follow-up.  
27  
28  
29  
30  
31  
32  
33  
34  
35  
36  
37  
38  
39  
40  
41  
42  
43  
44  
45  
46  
47  
48  
49  
50  
51  
52  
53  
54  
55  
56  
57  
58  
59  
60

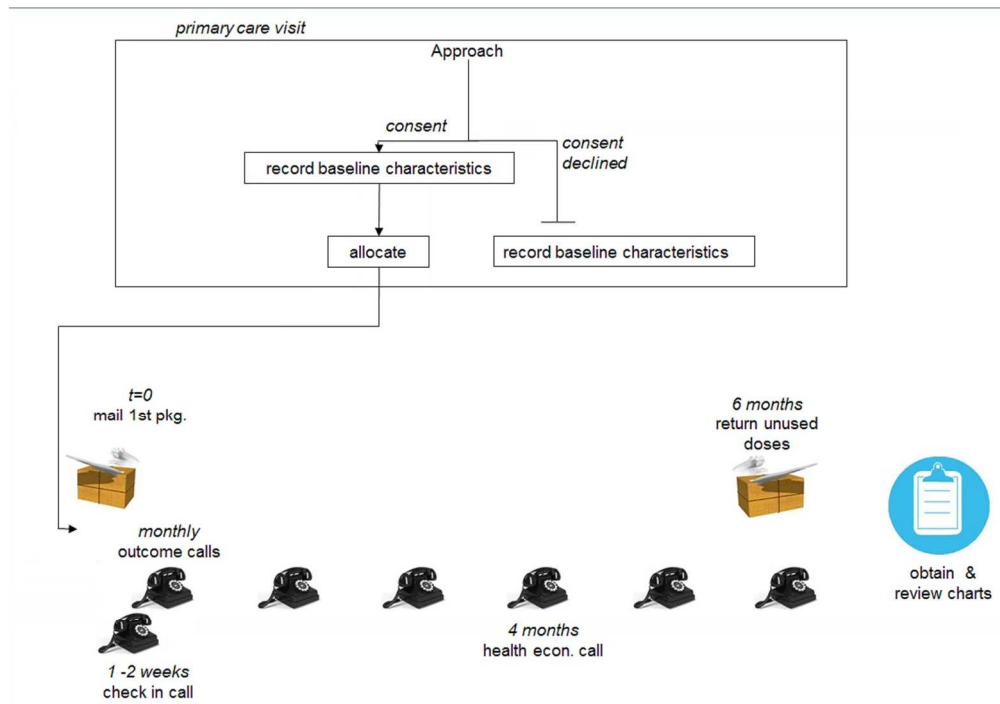

Figure 1. Timeline for intervention and follow up.

169x120mm (300 x 300 DPI)



## Appendix 1. Outcome determinations

### Primary outcome: number of episodes of physician diagnosed AOM

Information will be obtained from the chart review at the end of the study period.

(1) Does chart entry included diagnosis or assessment of “AOM” or “acute otitis media”? [Yes or No]

(2) Does a chart entry within 48 hours record physical examination findings of the tympanic membrane? [Yes or No]

*If, and only if, answers to both question are “Yes”, add one to total number of AOM episodes. Proceed to review the next chart entry until all chart entries during the study period have been reviewed.*

### Secondary outcome: number of parent reported URTIs

Information will be obtained via monthly telephone calls.

(1) Has the child had any of the symptoms for two consecutive days?

- stuffy nose or congestion or rhinorrhea
- cough
- sore throat
- wheeze
- shortness of breath

*If the child has had any of the above symptoms for two consecutive days, add one to the total number of parent reported URTI episodes.*

(2) Was the child well (symptom free) for two consecutive days during the illness?

*If the child was well for two consecutive days, add another one to the total number of parent reported URTI episodes (as this is a separate URTI) and repeat step (2) if needed.*

### Secondary outcome: parent reported dental caries (binary)

Information will be obtained via monthly telephone calls.

Have the parents or caregivers ever been told by a dentist or a physician that the child has or has had:

- dental caries
- multiple dental caries
- early childhood caries or ECC

1  
2  
3 *If the parents or caregivers have been told that the child has any of the above record the child as*  
4 *having dental caries (and in this case the parents and caregivers do not need to be asked about*  
5 *this on subsequent calls).*  
6

7  
8 Note that this outcome will also be assessed at baseline so that children with dental caries at  
9 baseline can be excluded from the dental caries analysis. This is because the outcome is binary  
10 (caries or not). Based on information available about children in the TARGet Kids! network, we  
11 expect 5-8 % of children to have caries at baseline and to be excluded from the dental caries  
12 analysis. Of course, all children will be included in the primary AOM analysis (and in the URTI  
13 analysis) regardless of whether they have had dental caries.  
14  
15  
16  
17  
18  
19  
20  
21  
22  
23  
24  
25  
26  
27  
28  
29  
30  
31  
32  
33  
34  
35  
36  
37  
38  
39  
40  
41  
42  
43  
44  
45  
46  
47  
48  
49  
50  
51  
52  
53  
54  
55  
56  
57  
58  
59  
60



SPIRIT 2013 Checklist: Recommended items to address in a clinical trial protocol and related documents\*

| Section/item                      | Item No | Description                                                                                                                                                                                                                                                                              | Addressed on page number |
|-----------------------------------|---------|------------------------------------------------------------------------------------------------------------------------------------------------------------------------------------------------------------------------------------------------------------------------------------------|--------------------------|
| <b>Administrative information</b> |         |                                                                                                                                                                                                                                                                                          |                          |
| Title                             | 1       | Descriptive title identifying the study design, population, interventions, and, if applicable, trial acronym                                                                                                                                                                             | 1                        |
| Trial registration                | 2a      | Trial identifier and registry name. If not yet registered, name of intended registry                                                                                                                                                                                                     | 2                        |
|                                   | 2b      | All items from the World Health Organization Trial Registration Data Set                                                                                                                                                                                                                 | N/A                      |
| Protocol version                  | 3       | Date and version identifier                                                                                                                                                                                                                                                              | N/A                      |
| Funding                           | 4       | Sources and types of financial, material, and other support                                                                                                                                                                                                                              | 11                       |
| Roles and responsibilities        | 5a      | Names, affiliations, and roles of protocol contributors                                                                                                                                                                                                                                  | 1                        |
|                                   | 5b      | Name and contact information for the trial sponsor                                                                                                                                                                                                                                       | 1                        |
|                                   | 5c      | Role of study sponsor and funders, if any, in study design; collection, management, analysis, and interpretation of data; writing of the report; and the decision to submit the report for publication, including whether they will have ultimate authority over any of these activities | 12                       |
|                                   | 5d      | Composition, roles, and responsibilities of the coordinating centre, steering committee, endpoint adjudication committee, data management team, and other individuals or groups overseeing the trial, if applicable (see Item 21a for data monitoring committee)                         | 5,10                     |

## Introduction

|                          |    |                                                                                                                                                                                                           |     |
|--------------------------|----|-----------------------------------------------------------------------------------------------------------------------------------------------------------------------------------------------------------|-----|
| Background and rationale | 6a | Description of research question and justification for undertaking the trial, including summary of relevant studies (published and unpublished) examining benefits and harms for each intervention        | 2-4 |
|                          | 6b | Explanation for choice of comparators                                                                                                                                                                     | 2-4 |
| Objectives               | 7  | Specific objectives or hypotheses                                                                                                                                                                         | 4   |
| Trial design             | 8  | Description of trial design including type of trial (eg, parallel group, crossover, factorial, single group), allocation ratio, and framework (eg, superiority, equivalence, noninferiority, exploratory) | 4   |

## Methods: Participants, interventions, and outcomes

|                      |     |                                                                                                                                                                                                                                                                                                                                                                                |      |
|----------------------|-----|--------------------------------------------------------------------------------------------------------------------------------------------------------------------------------------------------------------------------------------------------------------------------------------------------------------------------------------------------------------------------------|------|
| Study setting        | 9   | Description of study settings (eg, community clinic, academic hospital) and list of countries where data will be collected. Reference to where list of study sites can be obtained                                                                                                                                                                                             | 4    |
| Eligibility criteria | 10  | Inclusion and exclusion criteria for participants. If applicable, eligibility criteria for study centres and individuals who will perform the interventions (eg, surgeons, psychotherapists)                                                                                                                                                                                   | 4-5  |
| Interventions        | 11a | Interventions for each group with sufficient detail to allow replication, including how and when they will be administered                                                                                                                                                                                                                                                     | 5-6  |
|                      | 11b | Criteria for discontinuing or modifying allocated interventions for a given trial participant (eg, drug dose change in response to harms, participant request, or improving/worsening disease)                                                                                                                                                                                 | 6    |
|                      | 11c | Strategies to improve adherence to intervention protocols, and any procedures for monitoring adherence (eg, drug tablet return, laboratory tests)                                                                                                                                                                                                                              | 5-6  |
|                      | 11d | Relevant concomitant care and interventions that are permitted or prohibited during the trial                                                                                                                                                                                                                                                                                  | 5,10 |
| Outcomes             | 12  | Primary, secondary, and other outcomes, including the specific measurement variable (eg, systolic blood pressure), analysis metric (eg, change from baseline, final value, time to event), method of aggregation (eg, median, proportion), and time point for each outcome. Explanation of the clinical relevance of chosen efficacy and harm outcomes is strongly recommended | 6-8  |
| Participant timeline | 13  | Time schedule of enrolment, interventions (including any run-ins and washouts), assessments, and visits for participants. A schematic diagram is highly recommended (see Figure)                                                                                                                                                                                               | 5-6  |

|    |                                                                     |     |                                                                                                                                                                                                                                                                                                                                                                                                              |             |
|----|---------------------------------------------------------------------|-----|--------------------------------------------------------------------------------------------------------------------------------------------------------------------------------------------------------------------------------------------------------------------------------------------------------------------------------------------------------------------------------------------------------------|-------------|
| 1  |                                                                     |     |                                                                                                                                                                                                                                                                                                                                                                                                              |             |
| 2  |                                                                     |     |                                                                                                                                                                                                                                                                                                                                                                                                              |             |
| 3  | Sample size                                                         | 14  | Estimated number of participants needed to achieve study objectives and how it was determined, including clinical and statistical assumptions supporting any sample size calculations                                                                                                                                                                                                                        | 8-9         |
| 4  |                                                                     |     |                                                                                                                                                                                                                                                                                                                                                                                                              |             |
| 5  | Recruitment                                                         | 15  | Strategies for achieving adequate participant enrolment to reach target sample size                                                                                                                                                                                                                                                                                                                          | 2,9,        |
| 6  |                                                                     |     |                                                                                                                                                                                                                                                                                                                                                                                                              |             |
| 7  |                                                                     |     |                                                                                                                                                                                                                                                                                                                                                                                                              |             |
| 8  | <b>Methods: Assignment of interventions (for controlled trials)</b> |     |                                                                                                                                                                                                                                                                                                                                                                                                              |             |
| 9  |                                                                     |     |                                                                                                                                                                                                                                                                                                                                                                                                              |             |
| 10 | Allocation:                                                         |     |                                                                                                                                                                                                                                                                                                                                                                                                              |             |
| 11 |                                                                     |     |                                                                                                                                                                                                                                                                                                                                                                                                              |             |
| 12 | Sequence generation                                                 | 16a | Method of generating the allocation sequence (eg, computer-generated random numbers), and list of any factors for stratification. To reduce predictability of a random sequence, details of any planned restriction (eg, blocking) should be provided in a separate document that is unavailable to those who enrol participants or assign interventions                                                     | 4-5,9       |
| 13 |                                                                     |     |                                                                                                                                                                                                                                                                                                                                                                                                              |             |
| 14 |                                                                     |     |                                                                                                                                                                                                                                                                                                                                                                                                              |             |
| 15 |                                                                     |     |                                                                                                                                                                                                                                                                                                                                                                                                              |             |
| 16 |                                                                     |     |                                                                                                                                                                                                                                                                                                                                                                                                              |             |
| 17 | Allocation concealment mechanism                                    | 16b | Mechanism of implementing the allocation sequence (eg, central telephone; sequentially numbered, opaque, sealed envelopes), describing any steps to conceal the sequence until interventions are assigned                                                                                                                                                                                                    | 2, 5, 9, 10 |
| 18 |                                                                     |     |                                                                                                                                                                                                                                                                                                                                                                                                              |             |
| 19 |                                                                     |     |                                                                                                                                                                                                                                                                                                                                                                                                              |             |
| 20 |                                                                     |     |                                                                                                                                                                                                                                                                                                                                                                                                              |             |
| 21 | Implementation                                                      | 16c | Who will generate the allocation sequence, who will enrol participants, and who will assign participants to interventions                                                                                                                                                                                                                                                                                    | 5           |
| 22 |                                                                     |     |                                                                                                                                                                                                                                                                                                                                                                                                              |             |
| 23 |                                                                     |     |                                                                                                                                                                                                                                                                                                                                                                                                              |             |
| 24 | Blinding (masking)                                                  | 17a | Who will be blinded after assignment to interventions (eg, trial participants, care providers, outcome assessors, data analysts), and how                                                                                                                                                                                                                                                                    | 4           |
| 25 |                                                                     |     |                                                                                                                                                                                                                                                                                                                                                                                                              |             |
| 26 |                                                                     |     |                                                                                                                                                                                                                                                                                                                                                                                                              |             |
| 27 |                                                                     | 17b | If blinded, circumstances under which unblinding is permissible, and procedure for revealing a participant's allocated intervention during the trial                                                                                                                                                                                                                                                         | 10          |
| 28 |                                                                     |     |                                                                                                                                                                                                                                                                                                                                                                                                              |             |
| 29 |                                                                     |     |                                                                                                                                                                                                                                                                                                                                                                                                              |             |
| 30 |                                                                     |     |                                                                                                                                                                                                                                                                                                                                                                                                              |             |
| 31 | <b>Methods: Data collection, management, and analysis</b>           |     |                                                                                                                                                                                                                                                                                                                                                                                                              |             |
| 32 |                                                                     |     |                                                                                                                                                                                                                                                                                                                                                                                                              |             |
| 33 | Data collection methods                                             | 18a | Plans for assessment and collection of outcome, baseline, and other trial data, including any related processes to promote data quality (eg, duplicate measurements, training of assessors) and a description of study instruments (eg, questionnaires, laboratory tests) along with their reliability and validity, if known. Reference to where data collection forms can be found, if not in the protocol | 6-8         |
| 34 |                                                                     |     |                                                                                                                                                                                                                                                                                                                                                                                                              |             |
| 35 |                                                                     |     |                                                                                                                                                                                                                                                                                                                                                                                                              |             |
| 36 |                                                                     |     |                                                                                                                                                                                                                                                                                                                                                                                                              |             |
| 37 |                                                                     |     |                                                                                                                                                                                                                                                                                                                                                                                                              |             |
| 38 |                                                                     | 18b | Plans to promote participant retention and complete follow-up, including list of any outcome data to be collected for participants who discontinue or deviate from intervention protocols                                                                                                                                                                                                                    | 6-8         |
| 39 |                                                                     |     |                                                                                                                                                                                                                                                                                                                                                                                                              |             |
| 40 |                                                                     |     |                                                                                                                                                                                                                                                                                                                                                                                                              |             |
| 41 |                                                                     |     |                                                                                                                                                                                                                                                                                                                                                                                                              |             |
| 42 |                                                                     |     |                                                                                                                                                                                                                                                                                                                                                                                                              |             |
| 43 |                                                                     |     |                                                                                                                                                                                                                                                                                                                                                                                                              |             |
| 44 |                                                                     |     |                                                                                                                                                                                                                                                                                                                                                                                                              |             |
| 45 |                                                                     |     |                                                                                                                                                                                                                                                                                                                                                                                                              |             |
| 46 |                                                                     |     |                                                                                                                                                                                                                                                                                                                                                                                                              |             |
| 47 |                                                                     |     |                                                                                                                                                                                                                                                                                                                                                                                                              |             |

|    |                                 |     |                                                                                                                                                                                                                                                                                                                                       |       |
|----|---------------------------------|-----|---------------------------------------------------------------------------------------------------------------------------------------------------------------------------------------------------------------------------------------------------------------------------------------------------------------------------------------|-------|
| 1  |                                 |     |                                                                                                                                                                                                                                                                                                                                       |       |
| 2  |                                 |     |                                                                                                                                                                                                                                                                                                                                       |       |
| 3  | Data management                 | 19  | Plans for data entry, coding, security, and storage, including any related processes to promote data quality (eg, double data entry; range checks for data values). Reference to where details of data management procedures can be found, if not in the protocol                                                                     | 10    |
| 4  |                                 |     |                                                                                                                                                                                                                                                                                                                                       |       |
| 5  |                                 |     |                                                                                                                                                                                                                                                                                                                                       |       |
| 6  |                                 |     |                                                                                                                                                                                                                                                                                                                                       |       |
| 7  | Statistical methods             | 20a | Statistical methods for analysing primary and secondary outcomes. Reference to where other details of the statistical analysis plan can be found, if not in the protocol                                                                                                                                                              | 9     |
| 8  |                                 |     |                                                                                                                                                                                                                                                                                                                                       |       |
| 9  |                                 |     |                                                                                                                                                                                                                                                                                                                                       |       |
| 10 |                                 | 20b | Methods for any additional analyses (eg, subgroup and adjusted analyses)                                                                                                                                                                                                                                                              | 9     |
| 11 |                                 |     |                                                                                                                                                                                                                                                                                                                                       |       |
| 12 |                                 | 20c | Definition of analysis population relating to protocol non-adherence (eg, as randomised analysis), and any statistical methods to handle missing data (eg, multiple imputation)                                                                                                                                                       | 9     |
| 13 |                                 |     |                                                                                                                                                                                                                                                                                                                                       |       |
| 14 |                                 |     |                                                                                                                                                                                                                                                                                                                                       |       |
| 15 | <b>Methods: Monitoring</b>      |     |                                                                                                                                                                                                                                                                                                                                       |       |
| 16 |                                 |     |                                                                                                                                                                                                                                                                                                                                       |       |
| 17 | Data monitoring                 | 21a | Composition of data monitoring committee (DMC); summary of its role and reporting structure; statement of whether it is independent from the sponsor and competing interests; and reference to where further details about its charter can be found, if not in the protocol. Alternatively, an explanation of why a DMC is not needed | N/A   |
| 18 |                                 |     |                                                                                                                                                                                                                                                                                                                                       |       |
| 19 |                                 |     |                                                                                                                                                                                                                                                                                                                                       |       |
| 20 |                                 |     |                                                                                                                                                                                                                                                                                                                                       |       |
| 21 |                                 |     |                                                                                                                                                                                                                                                                                                                                       |       |
| 22 |                                 | 21b | Description of any interim analyses and stopping guidelines, including who will have access to these interim results and make the final decision to terminate the trial                                                                                                                                                               | 10    |
| 23 |                                 |     |                                                                                                                                                                                                                                                                                                                                       |       |
| 24 |                                 |     |                                                                                                                                                                                                                                                                                                                                       |       |
| 25 | Harms                           | 22  | Plans for collecting, assessing, reporting, and managing solicited and spontaneously reported adverse events and other unintended effects of trial interventions or trial conduct                                                                                                                                                     | 10    |
| 26 |                                 |     |                                                                                                                                                                                                                                                                                                                                       |       |
| 27 |                                 |     |                                                                                                                                                                                                                                                                                                                                       |       |
| 28 | Auditing                        | 23  | Frequency and procedures for auditing trial conduct, if any, and whether the process will be independent from investigators and the sponsor                                                                                                                                                                                           | N/A   |
| 29 |                                 |     |                                                                                                                                                                                                                                                                                                                                       |       |
| 30 |                                 |     |                                                                                                                                                                                                                                                                                                                                       |       |
| 31 |                                 |     |                                                                                                                                                                                                                                                                                                                                       |       |
| 32 | <b>Ethics and dissemination</b> |     |                                                                                                                                                                                                                                                                                                                                       |       |
| 33 |                                 |     |                                                                                                                                                                                                                                                                                                                                       |       |
| 34 | Research ethics approval        | 24  | Plans for seeking research ethics committee/institutional review board (REC/IRB) approval                                                                                                                                                                                                                                             | 10-11 |
| 35 |                                 |     |                                                                                                                                                                                                                                                                                                                                       |       |
| 36 |                                 |     |                                                                                                                                                                                                                                                                                                                                       |       |
| 37 | Protocol amendments             | 25  | Plans for communicating important protocol modifications (eg, changes to eligibility criteria, outcomes, analyses) to relevant parties (eg, investigators, REC/IRBs, trial participants, trial registries, journals, regulators)                                                                                                      | 10-11 |
| 38 |                                 |     |                                                                                                                                                                                                                                                                                                                                       |       |
| 39 |                                 |     |                                                                                                                                                                                                                                                                                                                                       |       |
| 40 |                                 |     |                                                                                                                                                                                                                                                                                                                                       |       |
| 41 |                                 |     |                                                                                                                                                                                                                                                                                                                                       |       |
| 42 |                                 |     |                                                                                                                                                                                                                                                                                                                                       |       |
| 43 |                                 |     |                                                                                                                                                                                                                                                                                                                                       |       |
| 44 |                                 |     |                                                                                                                                                                                                                                                                                                                                       |       |
| 45 |                                 |     |                                                                                                                                                                                                                                                                                                                                       |       |
| 46 |                                 |     |                                                                                                                                                                                                                                                                                                                                       |       |
| 47 |                                 |     |                                                                                                                                                                                                                                                                                                                                       |       |



|    |                               |     |                                                                                                                                                                                                                                                                                     |       |
|----|-------------------------------|-----|-------------------------------------------------------------------------------------------------------------------------------------------------------------------------------------------------------------------------------------------------------------------------------------|-------|
| 1  |                               |     |                                                                                                                                                                                                                                                                                     |       |
| 2  |                               |     |                                                                                                                                                                                                                                                                                     |       |
| 3  | Consent or assent             | 26a | Who will obtain informed consent or assent from potential trial participants or authorised surrogates, and how (see Item 32)                                                                                                                                                        | 9     |
| 4  |                               |     |                                                                                                                                                                                                                                                                                     |       |
| 5  |                               |     |                                                                                                                                                                                                                                                                                     |       |
| 6  |                               | 26b | Additional consent provisions for collection and use of participant data and biological specimens in ancillary studies, if applicable                                                                                                                                               | N/A   |
| 7  |                               |     |                                                                                                                                                                                                                                                                                     |       |
| 8  | Confidentiality               | 27  | How personal information about potential and enrolled participants will be collected, shared, and maintained in order to protect confidentiality before, during, and after the trial                                                                                                | 6,10  |
| 9  |                               |     |                                                                                                                                                                                                                                                                                     |       |
| 10 |                               |     |                                                                                                                                                                                                                                                                                     |       |
| 11 | Declaration of interests      | 28  | Financial and other competing interests for principal investigators for the overall trial and each study site                                                                                                                                                                       | 11    |
| 12 |                               |     |                                                                                                                                                                                                                                                                                     |       |
| 13 |                               |     |                                                                                                                                                                                                                                                                                     |       |
| 14 | Access to data                | 29  | Statement of who will have access to the final trial dataset, and disclosure of contractual agreements that limit such access for investigators                                                                                                                                     | 10,11 |
| 15 |                               |     |                                                                                                                                                                                                                                                                                     |       |
| 16 |                               |     |                                                                                                                                                                                                                                                                                     |       |
| 17 | Ancillary and post-trial care | 30  | Provisions, if any, for ancillary and post-trial care, and for compensation to those who suffer harm from trial participation                                                                                                                                                       | N/A   |
| 18 |                               |     |                                                                                                                                                                                                                                                                                     |       |
| 19 |                               |     |                                                                                                                                                                                                                                                                                     |       |
| 20 | Dissemination policy          | 31a | Plans for investigators and sponsor to communicate trial results to participants, healthcare professionals, the public, and other relevant groups (eg, via publication, reporting in results databases, or other data sharing arrangements), including any publication restrictions | 11    |
| 21 |                               |     |                                                                                                                                                                                                                                                                                     |       |
| 22 |                               |     |                                                                                                                                                                                                                                                                                     |       |
| 23 |                               |     |                                                                                                                                                                                                                                                                                     |       |
| 24 |                               |     |                                                                                                                                                                                                                                                                                     |       |
| 25 |                               | 31b | Authorship eligibility guidelines and any intended use of professional writers                                                                                                                                                                                                      | 11    |
| 26 |                               |     |                                                                                                                                                                                                                                                                                     |       |
| 27 |                               | 31c | Plans, if any, for granting public access to the full protocol, participant-level dataset, and statistical code                                                                                                                                                                     | N/A   |
| 28 |                               |     |                                                                                                                                                                                                                                                                                     |       |
| 29 | <b>Appendices</b>             |     |                                                                                                                                                                                                                                                                                     |       |
| 30 |                               |     |                                                                                                                                                                                                                                                                                     |       |
| 31 | Informed consent materials    | 32  | Model consent form and other related documentation given to participants and authorised surrogates                                                                                                                                                                                  | N/A   |
| 32 |                               |     |                                                                                                                                                                                                                                                                                     |       |
| 33 |                               |     |                                                                                                                                                                                                                                                                                     |       |
| 34 | Biological specimens          | 33  | Plans for collection, laboratory evaluation, and storage of biological specimens for genetic or molecular analysis in the current trial and for future use in ancillary studies, if applicable                                                                                      | N/A   |
| 35 |                               |     |                                                                                                                                                                                                                                                                                     |       |
| 36 |                               |     |                                                                                                                                                                                                                                                                                     |       |

37 \*It is strongly recommended that this checklist be read in conjunction with the SPIRIT 2013 Explanation & Elaboration for important clarification on the items.  
 38 Amendments to the protocol should be tracked and dated. The SPIRIT checklist is copyrighted by the SPIRIT Group under the Creative Commons  
 39 "[Attribution-NonCommercial-NoDerivs 3.0 Unported](https://creativecommons.org/licenses/by-nc-nd/3.0/)" license.  
 40
